# Supplementary material for: In silico characterisation of the complete Ly6 protein family in Fasciola gigantica supported through transcriptomics of the newly-excysted juveniles
Source: Royal Society of Chemistry journal article supplement (doi:10.1039/d1mo00254f), 2021-11-08
Supplement: d1mo00254f4.pdf [file d1mo00254f4.pdf]

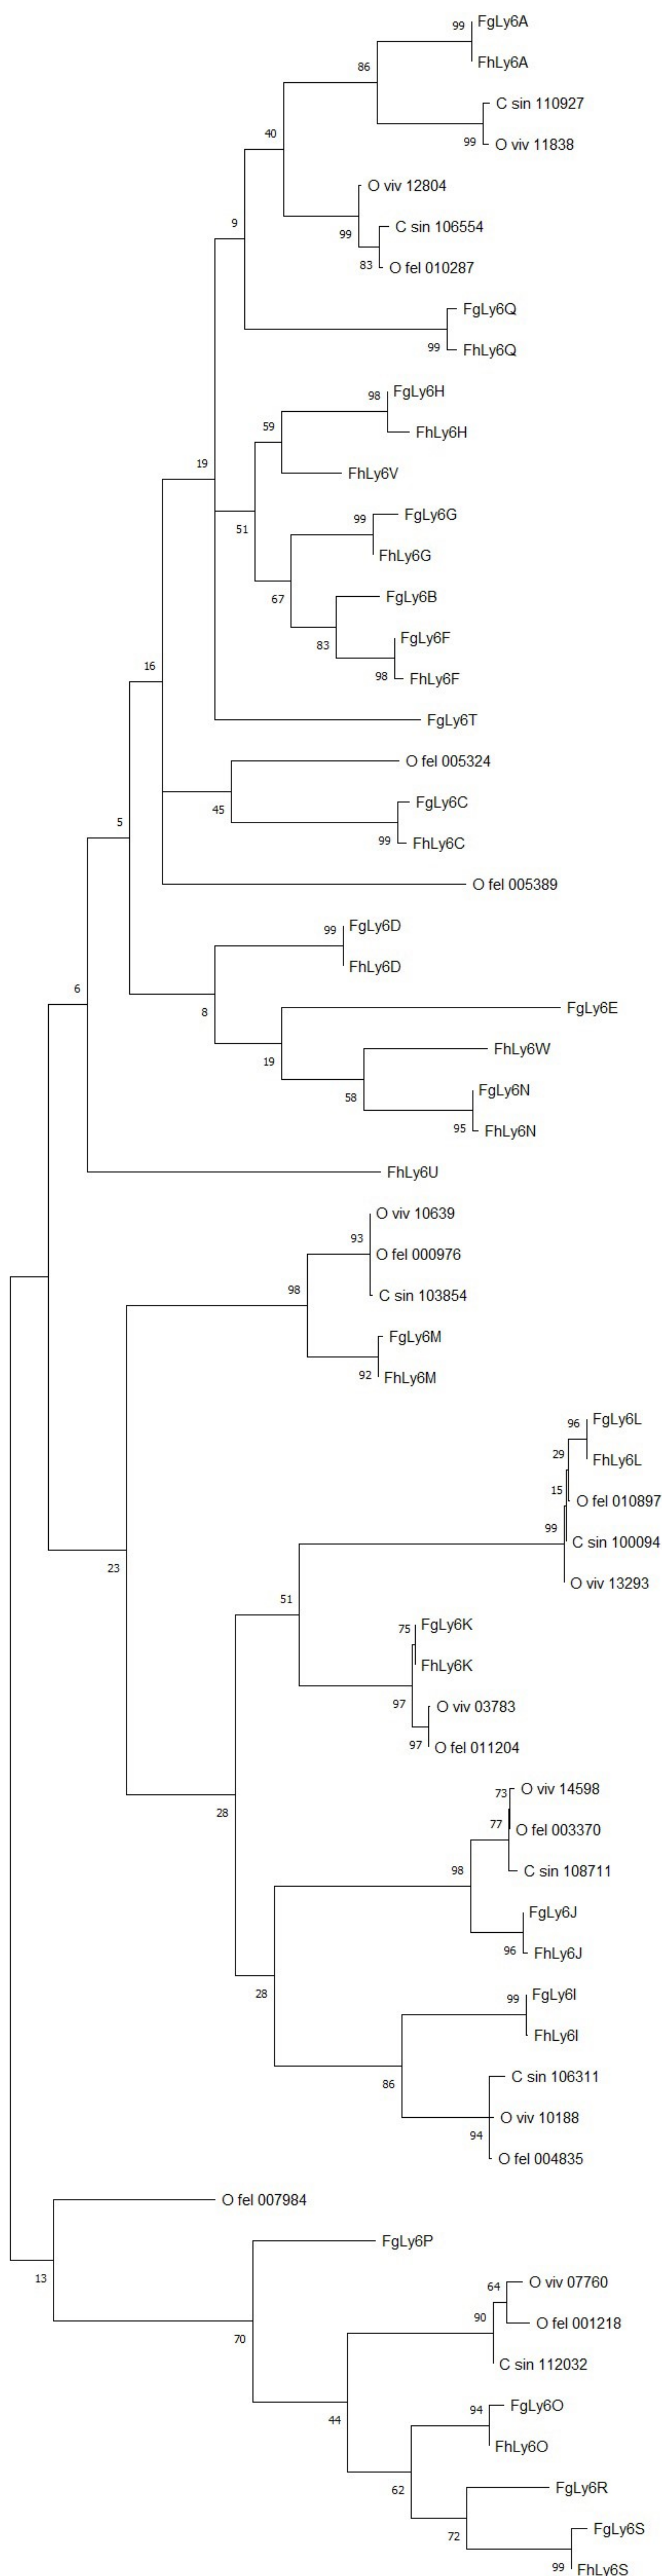

0.50
