# Supplementary material for: In silico characterisation of the complete Ly6 protein family in Fasciola gigantica supported through transcriptomics of the newly-excysted juveniles
Source: Mol Omics. 2021 Nov 8;18(1):45–56. doi: 10.1039/d1mo00254f (PMC8763315; doi:10.1039/d1mo00254f)
Supplement: MO-018-D1MO00254F-s001 [file MO-018-D1MO00254F-s001.xlsx]

## Sheet: fgiganticaRNAseqBlastAllPacHitP
NEJ transcriptome 454 RNAseqID	F. gigantica genome (GenBank accession GCA_006461475.1) mapping For term definitions, please visit: https://www.metagenomics.wiki/tools/blast/blastn-output-format-6
contigid	sseqid	pident	length	mismatch	gapopen	qstart	qend	sstart	send	evalue	bitscore
contig00005	SUNJ01009935.1	99.643	561	2	0	1	561	26163	26723	0	1026
contig00015	SUNJ01003722.1	99.698	331	1	0	127	457	95653	95323	4.85e-171	606
contig00021	SUNJ01007360.1	97.803	1866	37	3	1	1864	3234	5097	0	3216
contig00025	SUNJ01010371.1	96.5	200	2	5	234	429	2427	2229	4.76e-87	326
contig00028	SUNJ01005853.1	99.754	406	1	0	349	754	52617	52212	0	745
contig00030	SUNJ01002056.1	99.931	1439	1	0	1	1439	64666	63228	0	2652
contig00031	SUNJ01007654.1	100	294	0	0	919	1212	33712	34005	2.57e-152	544
contig00035	SUNJ01012772.1	98.547	826	11	1	269	1094	44907	45731	0	1458
contig00037	SUNJ01007597.1	99.384	1299	5	3	226	1524	3710	2415	0	2351
contig00038	SUNJ01015244.1	99.02	204	2	0	2	205	19783	19986	3.24e-99	366
contig00040	SUNJ01013018.1	99.465	374	2	0	1	374	16590	16963	0	680
contig00045	SUNJ01001591.1	98.565	209	3	0	321	529	166951	167159	5.29e-100	370
contig00046	SUNJ01008338.1	99.331	299	2	0	345	643	52387	52089	4.22e-152	542
contig00055	SUNJ01000587.1	100	674	0	0	1	674	57848	57175	0	1245
contig00063	SUNJ01009309.1	99.185	368	2	1	1538	1905	43559	43925	0	662
contig00064	SUNJ01012609.1	100	408	0	0	512	919	83041	83448	0	754
contig00077	SUNJ01001814.1	99.502	201	1	0	580	780	140631	140431	3.33e-99	366
contig00078	SUNJ01001814.1	99.492	197	1	0	565	761	130666	130470	5.44e-97	359
contig00080
contig00093	SUNJ01007916.1	98.509	872	12	1	1	872	32308	33178	0	1537
contig00095	SUNJ01009507.1	98.9	1364	13	1	1	1362	105493	106856	0	2435
contig00097	SUNJ01010756.1	99.465	374	2	0	842	1215	117509	117882	0	680
contig00100	SUNJ01004416.1	99.054	317	3	0	330	646	111726	111410	1.94e-160	569
contig00101	SUNJ01001683.1	95.775	213	1	5	467	672	14830	15041	2.24e-90	337
contig00106	SUNJ01015778.1	99.828	583	1	0	1	583	14005	13423	0	1072
contig00108	SUNJ01013359.1	98.101	632	7	2	1	627	99852	100483	0	1096
contig00116	SUNJ01005190.1	99.354	929	6	0	1	929	122182	121254	0	1683
contig00123	SUNJ01007993.1	99.29	704	2	1	3	706	159287	158587	0	1269
contig00127	SUNJ01006071.1	98.94	283	3	0	82	364	11589	11871	2.36e-141	507
contig00129	SUNJ01012117.1	99.074	324	3	0	167	490	120799	121122	2.92e-164	582
contig00134	SUNJ01011660.1	99.684	632	2	0	1	632	62582	63213	0	1157
contig00136	SUNJ01011746.1	99.329	149	0	1	1033	1181	175919	175772	1.56e-69	268
contig00137	SUNJ01001646.1	99.505	202	1	0	6	207	117733	117934	1.11e-99	368
contig00149	SUNJ01005855.1	98.667	300	3	1	143	442	115045	114747	9.56e-149	531
contig00151	SUNJ01004705.1	99.528	212	1	0	1	212	34949	34738	2.04e-105	387
contig00161	SUNJ01012617.1	100	235	0	0	1043	1277	49544	49310	1.51e-119	435
contig00164	SUNJ01001015.1	95.523	1385	58	2	1	1384	19047	17666	0	2211
contig00168	SUNJ01013450.1	96.667	180	2	4	216	391	162595	162774	3.07e-78	296
contig00170	SUNJ01006725.1	92.851	1147	70	11	18	1156	10072	11214	0	1653
contig00171	SUNJ01006279.1	99.279	416	2	1	1	415	31831	31416	0	750
contig00175	SUNJ01006273.1	98.538	342	4	1	564	905	72762	72422	3.05e-170	603
contig00179	SUNJ01012097.1	98.772	733	9	0	309	1041	264864	264132	0	1304
contig00186	SUNJ01002602.1	91.379	1392	41	67	1	1342	122529	121167	0	1832
contig00195	SUNJ01005503.1	99.176	364	3	0	1	364	173242	173605	0	656
contig00196	SUNJ01003059.1	99.827	577	1	0	1	577	35032	34456	0	1061
contig00199	SUNJ01003050.1	98.94	2452	19	7	1	2449	18300	15853	0	4377
contig00210	SUNJ01013771.1	100	518	0	0	147	664	131023	130506	0	957
contig00221	SUNJ01004061.1	98.746	319	4	0	442	760	83974	84292	8.3e-160	568
contig00233	SUNJ01004478.1	100	222	0	0	441	662	150217	150438	1.74e-112	411
contig00237	SUNJ01014649.1	98.943	473	2	1	191	663	53629	53160	0	843
contig00239	SUNJ01014649.1	100	383	0	0	263	645	21191	20809	0	708
contig00256	SUNJ01004291.1	99.09	659	5	1	26	684	4170	3513	0	1182
contig00258	SUNJ01005553.1	99.812	533	1	0	3	535	210459	209927	0	979
contig00259	SUNJ01008203.1	98.692	841	10	1	987	1826	80378	81218	0	1491
contig00261	SUNJ01015461.1	99.638	276	1	0	537	812	122993	123268	7.06e-141	505
contig00262	SUNJ01000287.1	99.606	507	2	0	5	511	13119	12613	0	926
contig00265	SUNJ01015324.1	99.735	378	1	0	284	661	11296	11673	0	693
contig00276	SUNJ01012422.1	98.84	431	2	3	105	534	175309	174881	0	765
contig00277	SUNJ01012422.1	99.368	475	1	1	1	475	181706	181234	0	859
contig00281	SUNJ01009106.1	97.365	835	7	1	2	836	459087	459906	0	1406
contig00282	SUNJ01005853.1	99.54	652	3	0	327	978	15856	15205	0	1188
contig00284	SUNJ01006006.1	99.675	922	2	1	1	922	104221	105141	0	1685
contig00287	SUNJ01003788.1	99.022	920	9	0	1109	2028	189506	188587	0	1650
contig00288	SUNJ01002694.1	100	859	0	0	1	859	49557	48699	0	1587
contig00289	SUNJ01013695.1	94.484	562	14	15	211	765	144746	144195	0	850
contig00291	SUNJ01013438.1	99.414	512	2	1	282	793	30357	29847	0	928
contig00296	SUNJ01006271.1	100	265	0	0	636	900	65104	65368	2.33e-136	490
contig00298	SUNJ01003847.1	99.394	330	1	1	524	853	14772	15100	1.2e-168	597
contig00300
contig00302	SUNJ01012354.1	99.14	465	4	0	59	523	118807	118343	0	837
contig00303	SUNJ01005221.1	99.828	583	0	1	35	617	48201	48782	0	1070
contig00304	SUNJ01001142.1	84.393	1211	167	10	11	1217	35070	33878	0	1170
contig00305	SUNJ01007889.1	99.574	705	2	1	305	1008	18932	19636	0	1284
contig00306	SUNJ01004643.1	99.011	1314	11	1	1	1312	132598	133911	0	2353
contig00311	SUNJ01012444.1	98.67	376	5	0	509	884	158998	159373	0	667
contig00324	SUNJ01006741.1	100	321	0	0	432	752	39049	38729	2.51e-167	593
contig00326	SUNJ01011456.1	99.811	530	1	0	50	579	29096	29625	0	974
contig00334	SUNJ01010526.1	99.811	530	0	1	1	530	64752	64224	0	972
contig00336	SUNJ01005815.1	99.753	405	1	0	1330	1734	47104	47508	0	743
contig00350	SUNJ01003201.1	99.751	402	1	0	579	980	24536	24937	0	737
contig00351	SUNJ01012763.1	98.618	868	10	1	1	868	86315	85450	0	1535
contig00352	SUNJ01005770.1	97.904	811	8	7	299	1105	20287	19482	0	1395
contig00353	SUNJ01008845.1	100	295	0	0	382	676	85898	85604	5.82e-153	545
contig00361	SUNJ01004188.1	100	293	0	0	504	796	276433	276141	6.97e-152	542
contig00381	SUNJ01006937.1	100	628	0	0	1	628	53089	53716	0	1160
contig00410	SUNJ01000902.1	100	477	0	0	634	1110	16051	15575	0	881
contig00417	SUNJ01014754.1	99.677	620	2	0	8	627	51560	50941	0	1134
contig00420	SUNJ01015622.1	99.62	263	1	0	376	638	144022	144284	2.96e-133	481
contig00441	SUNJ01009056.1	100	571	0	0	1	571	28522	27952	0	1055
contig00445	SUNJ01012168.1	99.215	382	3	0	1	382	35338	35719	0	689
contig00446	SUNJ01002138.1	98.556	277	4	0	490	766	71737	72013	2.84e-136	490
contig00447	SUNJ01008536.1	98.966	580	6	0	1	580	27908	27329	0	1038
contig00450	SUNJ01002769.1	99.479	192	1	0	170	361	69031	68840	2.32e-94	350
contig00453	SUNJ01003793.1	99.753	1213	3	0	2	1214	396354	397566	0	2224
contig00454	SUNJ01007651.1	99.789	474	1	0	562	1035	181774	182247	0	870
contig00461	SUNJ01015203.1	98.841	345	4	0	1	345	243520	243864	2.08e-174	616
contig00463	SUNJ01010445.1	100	355	0	0	285	639	62120	62474	0	656
contig00467	SUNJ01001898.1	99.43	526	3	0	40	565	77432	77957	0	955
contig00488	SUNJ01007651.1	99.716	352	1	0	9	360	180612	180261	0	645
contig00514	SUNJ01014401.1	99.24	263	2	0	641	903	277900	278162	7.28e-132	475
contig00533	SUNJ01006108.1	99.685	317	1	0	2	318	84425	84741	1.3e-163	580
contig00553	SUNJ01010010.1	86.517	712	42	40	73	741	1094	394	0	734
contig00577	SUNJ01001167.1	99.107	784	3	3	928	1710	356046	356826	0	1406
contig00586	SUNJ01015736.1	99.662	296	1	0	10	305	36855	36560	9.01e-152	542
contig00624	SUNJ01013836.1	99.747	792	2	0	501	1292	66581	67372	0	1452
contig00635	SUNJ01010010.1	83.717	565	45	36	11	539	13980	14533	1.29e-136	490
contig00638	SUNJ01004121.1	95.922	564	23	0	1	564	89535	90098	0	915
contig00645	SUNJ01006697.1	99.576	472	2	0	501	972	72900	73371	0	861
contig00652	SUNJ01008106.1	89.204	1695	65	92	1	1610	36819	35158	0	2008
contig00680	SUNJ01012489.1	98.675	453	6	0	1	453	94081	94533	0	804
contig00687	SUNJ01009989.1	100	229	0	0	1	229	83879	84107	1.76e-116	424
contig00700	SUNJ01002277.1	100	161	0	0	30	190	16368	16208	8.9e-79	298
contig00705	SUNJ01008191.1	96.512	86	0	3	1	86	17363	17281	5.27e-31	139
contig00755	SUNJ01002873.1	86.639	726	38	45	2	692	2527	1826	0	749
contig00780	SUNJ01008542.1	99.405	168	1	0	455	622	131226	131393	5.84e-81	305
contig00784	SUNJ01008042.1	99.876	2422	2	1	32	2452	87324	89745	0	4455
contig00791	SUNJ01006333.1	98.769	731	9	0	598	1328	296337	297067	0	1301
contig00795	SUNJ01002005.1	100	285	0	0	1339	1623	742826	742542	3.06e-147	527
contig00798	SUNJ01008562.1	98.703	617	7	1	4	619	50801	50185	0	1094
contig00958	SUNJ01014330.1	99.219	384	3	0	1	384	14322	14705	0	693
contig00964	SUNJ01008106.1	89.197	722	30	37	22	702	37929	37215	0	857
contig02209	SUNJ01012494.1	98.864	1584	9	7	1	1577	2657	4238	0	2817
contig02211	SUNJ01012494.1	98.361	610	8	2	1	610	1660	2267	0	1070
contig02710	SUNJ01010027.1	98.042	613	12	0	1	613	95738	95126	0	1066
contig03987	SUNJ01008908.1	99.481	578	3	0	741	1318	19869	19292	0	1051
contig04471	SUNJ01002899.1	99.845	644	1	0	56	699	18565	17922	0	1184
contig06121	SUNJ01006291.1	93.503	354	5	15	472	813	352516	352169	1.78e-142	510
contig06904	SUNJ01009261.1	100	410	0	0	618	1027	363305	362896	0	758
contig06907	SUNJ01007318.1	99.359	312	2	0	3	314	59397	59708	2.27e-159	566
contig13021	SUNJ01004092.1	99.527	634	3	0	190	823	12767	12134	0	1155
contig13024	SUNJ01003122.1	98.586	778	2	1	1	778	40689	41457	0	1367
isotig00010	SUNJ01015996.1	97.717	438	5	4	12	447	87707	88141	0	749
isotig00013	SUNJ01015996.1	95.434	438	9	5	12	441	87707	88141	0	688
isotig00015	SUNJ01005849.1	99.826	574	1	0	543	1116	35938	36511	0	1055
isotig00016	SUNJ01005849.1	99.826	574	1	0	543	1116	35938	36511	0	1055
isotig00017	SUNJ01005849.1	99.826	574	1	0	544	1117	35938	36511	0	1055
isotig00019	SUNJ01000976.1	99.588	243	1	0	596	838	2327	2085	1.62e-122	444
isotig00020	SUNJ01000976.1	99.588	243	1	0	533	775	2327	2085	1.49e-122	444
isotig00021	SUNJ01000976.1	99.588	243	1	0	504	746	2327	2085	1.44e-122	444
isotig00022	SUNJ01000976.1	99.588	243	1	0	504	746	2327	2085	1.44e-122	444
isotig00023	SUNJ01005230.1	99.636	275	1	0	202	476	79494	79768	2.72e-140	503
isotig00024	SUNJ01002557.1	100	569	0	0	1	569	3675	3107	0	1051
isotig00025	SUNJ01009203.1	99.053	528	5	0	1	528	111786	111259	0	948
isotig00039	SUNJ01001343.1	97.615	629	3	4	880	1496	32943	32315	0	1068
isotig00040	SUNJ01001681.1	99.337	754	2	1	706	1456	92930	92177	0	1362
isotig00070	SUNJ01001349.1	100	211	0	0	183	393	180845	180635	9.61e-107	390
isotig00071	SUNJ01001343.1	99.482	193	1	0	77	269	36495	36303	5.72e-95	351
isotig00072	SUNJ01009900.1	99.451	2550	7	7	741	3288	200739	198195	0	4625
isotig00073	SUNJ01009900.1	99.489	2544	7	6	704	3245	200734	198195	0	4621
isotig00074	SUNJ01009900.1	99.499	2597	7	6	109	2704	200786	198195	0	4719
isotig00075	SUNJ01013630.1	99.787	469	1	0	865	1333	200635	200167	0	861
isotig00076	SUNJ01013630.1	99.787	469	1	0	864	1332	200635	200167	0	861
isotig00077	SUNJ01009900.1	99.442	717	1	3	741	1456	200739	200025	0	1299
isotig00078	SUNJ01013630.1	99.787	469	1	0	786	1254	200635	200167	0	861
isotig00079	SUNJ01013630.1	99.787	469	1	0	785	1253	200635	200167	0	861
isotig00080	SUNJ01009900.1	99.578	711	1	2	704	1413	200734	200025	0	1295
isotig00084	SUNJ01009900.1	99.607	764	1	2	109	872	200786	200025	0	1393
isotig00085	SUNJ01005549.1	100	389	0	0	410	798	43191	42803	0	719
isotig00096
isotig00097
isotig00098
isotig00099
isotig00100	SUNJ01002050.1	99.306	288	1	1	5	291	65119	64832	1.59e-145	520
isotig00101	SUNJ01003819.1	87.057	649	21	51	561	1154	66688	67328	0	675
isotig00102	SUNJ01003819.1	86.769	650	22	52	561	1155	66688	67328	0	665
isotig00103	SUNJ01003819.1	87.057	649	21	51	436	1029	66688	67328	0	675
isotig00104	SUNJ01003819.1	86.769	650	22	52	436	1030	66688	67328	0	665
isotig00105	SUNJ01003819.1	87.057	649	21	51	463	1056	66688	67328	0	675
isotig00106	SUNJ01012202.1	99.725	364	1	0	1	364	65621	65984	0	667
isotig00107	SUNJ01001101.1	99.351	1695	8	3	1	1693	133711	135404	0	3066
isotig00108	SUNJ01003819.1	87.057	649	21	51	410	1003	66688	67328	0	675
isotig00109	SUNJ01003819.1	86.769	650	22	52	410	1004	66688	67328	0	665
isotig00110	SUNJ01008997.1	95.858	338	13	1	1	338	81540	81876	5.3e-153	545
isotig00111	SUNJ01008997.1	95.846	337	14	0	1	337	81540	81876	5.3e-153	545
isotig00112	SUNJ01012202.1	100	198	0	0	265	462	65787	65984	3.83e-99	366
isotig00113	SUNJ01012202.1	100	198	0	0	140	337	65787	65984	3.28e-99	366
isotig00114	SUNJ01003819.1	86.733	701	23	57	124	762	66636	67328	0	715
isotig00115	SUNJ01003819.1	86.467	702	24	58	124	763	66636	67328	0	704
isotig00116	SUNJ01012202.1	99.725	364	1	0	1	364	65621	65984	0	667
isotig00117	SUNJ01003819.1	86.704	707	23	58	113	757	66631	67328	0	719
isotig00118	SUNJ01003819.1	86.441	708	24	59	113	758	66631	67328	0	710
isotig00119	SUNJ01012202.1	100	198	0	0	114	311	65787	65984	3.16e-99	366
isotig00120	SUNJ01001101.1	98.868	530	5	1	1	529	135404	134875	0	944
isotig00121	SUNJ01001101.1	98.868	530	5	1	1	529	135404	134875	0	944
isotig00122	SUNJ01005020.1	98.913	184	1	1	161	343	412151	411968	1.11e-87	327
isotig00123	SUNJ01003420.1	88.053	226	19	6	24	245	12276	12497	1.02e-67	261
isotig00124	SUNJ01003819.1	86.628	172	6	15	113	268	66631	66801	1.35e-41	174
isotig00125	SUNJ01008997.1	96.5	400	13	1	1	400	81540	81938	0	660
isotig00126	SUNJ01008997.1	96.491	399	14	0	1	399	81540	81938	0	660
isotig00127	SUNJ01005020.1	98.913	184	1	1	161	343	412151	411968	7.31e-88	327
isotig00128	SUNJ01014659.1	96.937	457	12	2	166	620	85347	85803	0	765
isotig00129	SUNJ01001961.1	95.787	356	14	1	273	628	16614	16968	1.46e-161	573
isotig00130	SUNJ01007095.1	97.71	655	14	1	10	664	79713	79060	0	1125
isotig00131	SUNJ01004347.1	97.84	463	10	0	17	479	37483	37945	0	800
isotig00132	SUNJ01003941.1	96.768	495	14	2	17	509	333242	333736	0	824
isotig00133	SUNJ01005694.1	92.424	462	14	11	17	457	57018	56557	0	640
isotig00134	SUNJ01014402.1	97.154	492	8	5	17	504	44141	44630	0	826
isotig00135	SUNJ01000105.1	93.173	249	15	2	166	412	116293	116045	6.13e-99	364
isotig00136	SUNJ01000105.1	92.369	249	17	2	179	425	116293	116045	1.37e-95	353
isotig00137	SUNJ01013365.1	95.532	470	18	2	17	485	10003	10470	0	749
isotig00138	SUNJ01003941.1	96.552	290	9	1	173	461	333447	333736	2.37e-133	479
isotig00139	SUNJ01000105.1	90.043	462	37	8	17	472	116503	116045	1.07e-166	590
isotig00140	SUNJ01003941.1	96.914	324	9	1	17	339	333242	333565	2.96e-152	542
isotig00141	SUNJ01003075.1	96.352	466	12	4	10	474	27582	28043	0	761
isotig00142	SUNJ01004974.1	95.991	449	15	2	2	447	148628	149076	0	726
isotig00143	SUNJ01013365.1	98.137	161	2	1	17	176	10003	10163	2.28e-73	279
isotig00144	SUNJ01014402.1	100	164	0	0	17	180	44141	44304	1.3e-80	303
isotig00145	SUNJ01014402.1	98.921	278	1	1	17	294	44141	44416	2.26e-138	496
isotig00146	SUNJ01004974.1	97.455	275	7	0	2	276	148628	148902	1.32e-130	470
isotig00147	SUNJ01003482.1	97.625	1137	19	6	2508	3642	2038	3168	0	1943
isotig00148	SUNJ01003482.1	97.625	1137	19	6	2475	3609	2038	3168	0	1943
isotig00149	SUNJ01003482.1	97.625	1137	19	6	2467	3601	2038	3168	0	1943
isotig00150	SUNJ01003482.1	97.625	1137	19	6	2434	3568	2038	3168	0	1943
isotig00151	SUNJ01003482.1	97.625	1137	19	6	1576	2710	2038	3168	0	1943
isotig00152	SUNJ01003482.1	97.625	1137	19	6	1543	2677	2038	3168	0	1943
isotig00153	SUNJ01003482.1	97.625	1137	19	6	1535	2669	2038	3168	0	1943
isotig00154	SUNJ01003482.1	97.625	1137	19	6	1456	2590	2038	3168	0	1943
isotig00155	SUNJ01003482.1	97.625	1137	19	6	1502	2636	2038	3168	0	1943
isotig00156	SUNJ01003482.1	97.625	1137	19	6	1423	2557	2038	3168	0	1943
isotig00157	SUNJ01003482.1	97.625	1137	19	6	1415	2549	2038	3168	0	1943
isotig00158	SUNJ01003482.1	97.625	1137	19	6	1382	2516	2038	3168	0	1943
isotig00159	SUNJ01015226.1	99.822	562	1	0	1	562	357213	357774	0	1033
isotig00160	SUNJ01015226.1	99.822	562	1	0	1	562	357213	357774	0	1033
isotig00161	SUNJ01015226.1	99.822	562	1	0	1	562	357213	357774	0	1033
isotig00162	SUNJ01003482.1	97.625	1137	19	6	1463	2597	2038	3168	0	1943
isotig00163	SUNJ01015226.1	99.822	562	1	0	1	562	357213	357774	0	1033
isotig00164	SUNJ01003482.1	97.625	1137	19	6	1430	2564	2038	3168	0	1943
isotig00165	SUNJ01003482.1	97.625	1137	19	6	1330	2464	2038	3168	0	1943
isotig00166	SUNJ01003482.1	97.625	1137	19	6	1297	2431	2038	3168	0	1943
isotig00167	SUNJ01010181.1	95.76	566	21	1	139	701	5691	6256	0	909
isotig00168	SUNJ01010181.1	95.76	566	21	1	139	701	5691	6256	0	909
isotig00169	SUNJ01010717.1	96.986	365	8	1	139	500	278602	278966	3.02e-172	610
isotig00170	SUNJ01015226.1	99.822	562	1	0	1	562	357213	357774	0	1033
isotig00171	SUNJ01010563.1	96.034	353	14	0	229	581	36873	37225	1.05e-161	575
isotig00172	SUNJ01010717.1	96.986	365	8	1	139	500	278602	278966	2.95e-172	610
isotig00173	SUNJ01015226.1	99.822	562	1	0	1	562	357213	357774	0	1033
isotig00174	SUNJ01010563.1	96.034	353	14	0	229	581	36873	37225	1.02e-161	575
isotig00175	SUNJ01010717.1	99.663	297	1	0	749	1045	56154	56450	2.87e-152	544
isotig00176	SUNJ01010717.1	98.477	197	3	0	1305	1501	56849	57045	2.36e-93	348
isotig00177	SUNJ01015226.1	99.822	562	1	0	1	562	357213	357774	0	1033
isotig00178	SUNJ01015226.1	99.822	562	1	0	1	562	357213	357774	0	1033
isotig00179	SUNJ01015226.1	99.822	562	1	0	1	562	357213	357774	0	1033
isotig00180	SUNJ01015226.1	99.822	562	1	0	1	562	357213	357774	0	1033
isotig00181	SUNJ01010717.1	99.663	297	1	0	797	1093	56154	56450	2.96e-152	544
isotig00182	SUNJ01015658.1	100	198	0	0	521	718	134366	134563	6.74e-99	366
isotig00183	SUNJ01015226.1	99.822	562	1	0	1	562	357213	357774	0	1033
isotig00184	SUNJ01015226.1	99.822	562	1	0	1	562	357213	357774	0	1033
isotig00185	SUNJ01010717.1	99.663	297	1	0	664	960	56154	56450	2.71e-152	544
isotig00186	SUNJ01015658.1	100	198	0	0	388	585	134366	134563	6.16e-99	366
isotig00187	SUNJ01015226.1	99.822	562	1	0	1	562	357213	357774	0	1033
isotig00188	SUNJ01010181.1	96.165	704	24	1	139	839	5691	6394	0	1147
isotig00189	SUNJ01010717.1	96.986	365	8	1	139	500	278602	278966	1.56e-172	610
isotig00190	SUNJ01010563.1	96.341	492	18	0	229	720	36873	37364	0	809
isotig00191	SUNJ01010181.1	96.321	299	11	0	380	678	6096	6394	5.07e-137	492
isotig00192	SUNJ01010181.1	95.677	532	20	1	139	667	5691	6222	0	852
isotig00193	SUNJ01010181.1	96.989	631	16	1	139	766	5691	6321	0	1057
isotig00194	SUNJ01010717.1	96.986	365	8	1	139	500	278602	278966	1.27e-172	610
isotig00195	SUNJ01010563.1	95.925	319	13	0	229	547	36873	37191	7e-145	518
isotig00196	SUNJ01010717.1	96.986	365	8	1	139	500	278602	278966	1.29e-172	610
isotig00197	SUNJ01010563.1	97.847	418	9	0	229	646	36873	37290	0	723
isotig00198	SUNJ01010563.1	97.368	152	4	0	229	380	36873	37024	4.38e-67	259
isotig00199	SUNJ01015240.1	99.115	226	2	0	380	605	365077	364852	1.51e-111	407
isotig00200	SUNJ01007552.1	96.667	300	7	1	139	435	6363	6662	3.43e-138	496
isotig00201	SUNJ01010717.1	97.531	486	9	1	139	621	278602	279087	0	828
isotig00202	SUNJ01001108.1	97.436	273	6	1	229	501	450	179	7.25e-129	464
isotig00203	SUNJ01007552.1	96.61	295	7	1	139	430	6363	6657	1.67e-135	486
isotig00204	SUNJ01005427.1	96.825	126	3	1	164	288	4584	4459	2.59e-52	209
isotig00211	SUNJ01015308.1	99.132	576	4	1	11	585	181417	181992	0	1035
isotig00212	SUNJ01015308.1	99.132	576	4	1	11	585	181417	181992	0	1035
isotig00213	SUNJ01015308.1	99.472	379	1	1	146	523	181614	181992	0	688
isotig00214	SUNJ01015308.1	99.472	379	1	1	146	523	181614	181992	0	688
isotig00218	SUNJ01015308.1	99.132	576	4	1	11	585	181417	181992	0	1035
isotig00219	SUNJ01015308.1	99.132	576	4	1	11	585	181417	181992	0	1035
isotig00220	SUNJ01015308.1	99.472	379	1	1	146	523	181614	181992	0	688
isotig00221	SUNJ01015308.1	99.472	379	1	1	146	523	181614	181992	0	688
isotig00223	SUNJ01015308.1	99.158	594	4	1	11	603	181417	182010	0	1068
isotig00224	SUNJ01007035.1	99.702	336	0	1	260	594	43472	43137	1.21e-173	614
isotig00225	SUNJ01007035.1	99.702	336	0	1	260	594	43472	43137	1.27e-173	614
isotig00226	SUNJ01015308.1	99.496	397	1	1	146	541	181614	182010	0	721
isotig00227	SUNJ01007035.1	100	333	0	0	260	592	43472	43140	2.62e-174	616
isotig00228	SUNJ01007035.1	100	331	0	0	260	590	43472	43142	3.39e-173	612
isotig00230	SUNJ01015308.1	97.917	144	3	0	11	154	181417	181560	2.69e-64	250
isotig00231	SUNJ01015308.1	98.485	198	3	0	1	198	181432	181629	2.85e-94	350
isotig00232	SUNJ01008440.1	99.254	134	1	0	1	134	43716	43849	4.71e-62	243
isotig00234	SUNJ01002022.1	99.323	739	3	2	3	739	163886	163148	0	1336
isotig00235	SUNJ01002022.1	99.323	739	3	2	3	739	163886	163148	0	1336
isotig00236	SUNJ01002022.1	99.323	739	3	2	3	739	163886	163148	0	1336
isotig00237	SUNJ01002022.1	99.323	739	3	2	3	739	163886	163148	0	1336
isotig00238	SUNJ01002022.1	99.323	739	3	2	3	739	163886	163148	0	1336
isotig00239	SUNJ01002022.1	99.323	739	3	2	3	739	163886	163148	0	1336
isotig00240	SUNJ01010695.1	99.351	1079	4	3	683	1759	61949	63026	0	1951
isotig00241	SUNJ01010695.1	99.445	1081	4	2	683	1761	61949	63029	0	1962
isotig00242	SUNJ01008501.1	98.706	541	4	3	367	905	131928	131389	0	957
isotig00243	SUNJ01008501.1	98.704	540	4	3	367	903	131928	131389	0	955
isotig00244	SUNJ01008501.1	98.954	478	3	2	367	842	131928	131451	0	854
isotig00245	SUNJ01008501.1	98.9	727	6	2	217	941	132115	131389	0	1297
isotig00246	SUNJ01008501.1	98.624	727	7	3	217	940	132115	131389	0	1284
isotig00247	SUNJ01008501.1	98.742	477	3	3	367	840	131928	131452	0	845
isotig00248	SUNJ01008501.1	98.501	667	6	4	217	881	132115	131451	0	1173
isotig00249	SUNJ01008501.1	98.706	541	4	3	374	912	131928	131389	0	957
isotig00250	SUNJ01008501.1	98.704	540	4	3	374	910	131928	131389	0	955
isotig00251	SUNJ01008501.1	98.954	478	3	2	374	849	131928	131451	0	854
isotig00252	SUNJ01008501.1	98.797	665	5	3	217	879	132115	131452	0	1181
isotig00253	SUNJ01008501.1	99.156	948	6	2	3	948	132336	131389	0	1705
isotig00254	SUNJ01008501.1	98.945	948	7	3	3	947	132336	131389	0	1692
isotig00255	SUNJ01008501.1	98.742	477	3	3	374	847	131928	131452	0	845
isotig00256	SUNJ01008501.1	98.874	888	6	4	3	888	132336	131451	0	1581
isotig00257	SUNJ01008501.1	99.097	886	5	3	3	886	132336	131452	0	1589
isotig00258	SUNJ01006791.1	99.31	580	1	3	2	579	80807	81385	0	1046
isotig00260	SUNJ01001848.1	96.61	885	29	1	345	1229	33531	34414	0	1467
isotig00261	SUNJ01001848.1	96.61	885	29	1	345	1229	33531	34414	0	1467
isotig00262	SUNJ01001848.1	96.61	885	29	1	309	1193	33531	34414	0	1467
isotig00264	SUNJ01001848.1	96.61	885	29	1	309	1193	33531	34414	0	1467
isotig00266	SUNJ01001848.1	96.61	885	29	1	245	1129	33531	34414	0	1467
isotig00267	SUNJ01001848.1	96.61	885	29	1	245	1129	33531	34414	0	1467
isotig00268	SUNJ01012029.1	99.107	112	1	0	1	112	221332	221221	7.72e-50	202
isotig00269	SUNJ01012029.1	99.107	112	1	0	1	112	221332	221221	7.72e-50	202
isotig00270
isotig00271
isotig00272
isotig00273
isotig00274	SUNJ01012029.1	99.107	112	1	0	1	112	221332	221221	7.06e-50	202
isotig00275
isotig00276	SUNJ01012029.1	99.107	112	1	0	1	112	221332	221221	7.06e-50	202
isotig00278
isotig00279
isotig00281
isotig00282	SUNJ01012029.1	99.107	112	1	0	1	112	221332	221221	7.03e-50	202
isotig00283	SUNJ01012029.1	99.107	112	1	0	1	112	221332	221221	7.03e-50	202
isotig00285
isotig00287
isotig00288
isotig00289
isotig00290	SUNJ01012029.1	99.107	112	1	0	1	112	221332	221221	6.97e-50	202
isotig00291	SUNJ01012029.1	99.107	112	1	0	1	112	221332	221221	6.97e-50	202
isotig00294
isotig00295	SUNJ01012029.1	99.107	112	1	0	1	112	221332	221221	5.99e-50	202
isotig00298
isotig00299	SUNJ01012029.1	99.107	112	1	0	1	112	221332	221221	5.99e-50	202
isotig00301
isotig00303
isotig00304	SUNJ01012029.1	99.107	112	1	0	1	112	221332	221221	5.71e-50	202
isotig00305
isotig00306	SUNJ01012029.1	99.107	112	1	0	1	112	221332	221221	5.71e-50	202
isotig00307	SUNJ01001848.1	85.915	71	10	0	124	194	34806	34876	4.02e-12	76.8
isotig00309
isotig00310
isotig00311
isotig00313	SUNJ01012029.1	99.107	112	1	0	1	112	221332	221221	5.4e-50	202
isotig00314
isotig00315
isotig00316	SUNJ01012029.1	99.107	112	1	0	1	112	221332	221221	5.4e-50	202
isotig00318
isotig00320
isotig00321
isotig00322	SUNJ01001848.1	85.915	71	10	0	124	194	34806	34876	3.58e-12	76.8
isotig00323
isotig00324
isotig00325	SUNJ01001848.1	85.915	71	10	0	124	194	34806	34876	3.57e-12	76.8
isotig00326
isotig00327	SUNJ01001938.1	97.917	528	11	0	1066	1593	28338	27811	0	915
isotig00328	SUNJ01007540.1	98.547	344	4	1	400	743	53354	53012	3.38e-171	606
isotig00329	SUNJ01007540.1	98.547	344	4	1	400	743	53354	53012	3.38e-171	606
isotig00330	SUNJ01007540.1	98.547	344	4	1	400	743	53354	53012	3.38e-171	606
isotig00331	SUNJ01007540.1	98.547	344	4	1	400	743	53354	53012	3.38e-171	606
isotig00332	SUNJ01007540.1	96.783	373	8	3	903	1275	34056	33688	3.88e-175	619
isotig00333	SUNJ01007540.1	97.305	371	8	2	903	1273	34056	33688	6.43e-178	628
isotig00334	SUNJ01007540.1	97.305	371	8	2	903	1273	34056	33688	6.43e-178	628
isotig00335	SUNJ01007540.1	96.524	374	8	4	903	1276	34056	33688	1.81e-173	614
isotig00336	SUNJ01007540.1	96.774	372	9	2	903	1274	34056	33688	1.39e-174	617
isotig00337	SUNJ01007540.1	97.305	371	8	2	903	1273	34056	33688	6.43e-178	628
isotig00338	SUNJ01007540.1	97.297	370	9	1	903	1272	34056	33688	2.31e-177	627
isotig00339	SUNJ01007540.1	97.297	370	9	1	903	1272	34056	33688	2.31e-177	627
isotig00340	SUNJ01007540.1	96.515	373	9	3	903	1275	34056	33688	1.8e-173	614
isotig00341	SUNJ01007540.1	97.297	370	9	1	903	1272	34056	33688	2.31e-177	627
isotig00342	SUNJ01007540.1	98.547	344	4	1	400	743	53354	53012	3.38e-171	606
isotig00343	SUNJ01007540.1	98.547	344	4	1	400	743	53354	53012	3.38e-171	606
isotig00344	SUNJ01007540.1	96.783	373	8	2	903	1275	34056	33688	3.88e-175	619
isotig00345	SUNJ01007540.1	97.043	372	8	2	903	1274	34056	33688	3e-176	623
isotig00346	SUNJ01007540.1	97.568	370	8	1	903	1272	34056	33688	4.97e-179	632
isotig00347	SUNJ01007540.1	97.568	370	8	1	903	1272	34056	33688	4.97e-179	632
isotig00348	SUNJ01007540.1	96.774	372	9	1	903	1274	34056	33688	1.39e-174	617
isotig00349	SUNJ01007540.1	96.783	373	8	3	903	1275	34056	33688	3.88e-175	619
isotig00350	SUNJ01007540.1	97.305	371	8	2	903	1273	34056	33688	6.43e-178	628
isotig00351	SUNJ01007540.1	97.568	370	8	1	903	1272	34056	33688	4.97e-179	632
isotig00352	SUNJ01007540.1	97.297	370	9	1	903	1272	34056	33688	2.31e-177	627
isotig00353	SUNJ01007540.1	97.043	372	8	1	903	1274	34056	33688	3e-176	623
isotig00354	SUNJ01007540.1	97.568	370	8	1	903	1272	34056	33688	4.97e-179	632
isotig00355	SUNJ01007540.1	98.547	344	4	1	400	743	53354	53012	2.91e-171	606
isotig00356	SUNJ01001938.1	98.623	944	13	0	1	944	28754	27811	0	1672
isotig00357	SUNJ01007540.1	96.694	363	9	2	1	363	34047	33688	3.87e-170	601
isotig00358	SUNJ01004390.1	97.855	606	5	8	1	603	146445	147045	0	1040
isotig00359	SUNJ01004390.1	97.525	606	4	10	1	600	146445	147045	0	1026
isotig00360	SUNJ01004390.1	97.03	606	4	12	1	597	146445	147045	0	1007
isotig00361	SUNJ01004390.1	96.205	606	3	11	1	591	146445	147045	0	974
isotig00362	SUNJ01004390.1	97.36	606	8	8	1	603	146445	147045	0	1024
isotig00363	SUNJ01004390.1	97.03	606	7	10	1	600	146445	147045	0	1009
isotig00364	SUNJ01004390.1	96.535	606	7	12	1	597	146445	147045	0	990
isotig00365	SUNJ01004390.1	95.71	606	6	11	1	591	146445	147045	0	957
isotig00366	SUNJ01004390.1	97.778	495	4	7	1	493	146445	146934	0	846
isotig00367	SUNJ01004390.1	97.764	492	4	7	1	490	146445	146931	0	841
isotig00368	SUNJ01004390.1	97.751	489	4	7	1	487	146445	146928	0	835
isotig00369	SUNJ01004390.1	97.741	487	4	7	1	485	146445	146926	0	832
isotig00370	SUNJ01004390.1	97.737	486	9	2	1	485	145406	145890	0	835
isotig00371	SUNJ01004390.1	97.723	483	4	7	1	481	146445	146922	0	824
isotig00372	SUNJ01004390.1	97.723	483	9	2	1	482	145406	145887	0	830
isotig00373	SUNJ01004390.1	97.737	486	9	2	1	485	145406	145890	0	835
isotig00374	SUNJ01004390.1	97.172	495	7	7	1	493	146445	146934	0	830
isotig00375	SUNJ01004390.1	97.154	492	7	7	1	490	146445	146931	0	824
isotig00376	SUNJ01004390.1	97.137	489	7	7	1	487	146445	146928	0	819
isotig00377	SUNJ01004390.1	97.125	487	7	7	1	485	146445	146926	0	815
isotig00378	SUNJ01004390.1	97.119	486	12	2	1	485	145406	145890	0	819
isotig00379	SUNJ01004390.1	97.101	483	7	7	1	481	146445	146922	0	808
isotig00380	SUNJ01004390.1	97.101	483	12	2	1	482	145406	145887	0	813
isotig00381	SUNJ01004390.1	97.119	486	12	2	1	485	145406	145890	0	819
isotig00382	SUNJ01004390.1	97.49	478	4	7	1	475	146445	146917	0	809
isotig00383	SUNJ01004390.1	96.862	478	7	7	1	475	146445	146917	0	793
isotig00384	SUNJ01004390.1	97.018	570	10	5	2	566	145446	146013	0	952
isotig00385	SUNJ01004390.1	96.491	570	10	7	2	563	145446	146013	0	933
isotig00386	SUNJ01004390.1	96.14	570	9	9	2	560	145446	146013	0	918
isotig00387	SUNJ01004390.1	95.263	570	8	9	2	554	145446	146013	0	885
isotig00388	SUNJ01004390.1	97.149	456	10	3	2	456	145446	145899	0	767
isotig00389	SUNJ01004390.1	97.13	453	10	3	2	453	145446	145896	0	761
isotig00390	SUNJ01004390.1	97.327	449	10	2	2	450	145446	145892	0	761
isotig00391	SUNJ01004390.1	97.315	447	10	2	2	448	145446	145890	0	758
isotig00392	SUNJ01004390.1	97.539	447	9	2	2	448	145446	145890	0	763
isotig00393	SUNJ01004390.1	97.291	443	10	2	2	444	145446	145886	0	750
isotig00394	SUNJ01004390.1	97.523	444	9	2	2	445	145446	145887	0	758
isotig00395	SUNJ01004390.1	97.539	447	9	2	2	448	145446	145890	0	763
isotig00396	SUNJ01004390.1	97.032	438	10	3	2	438	145446	145881	0	734
isotig00397	SUNJ01004390.1	96.853	286	4	3	107	387	145728	146013	9.13e-132	473
isotig00398	SUNJ01004390.1	95.804	286	4	5	107	384	145728	146013	3.28e-126	455
isotig00399	SUNJ01004390.1	95.105	286	3	7	107	381	145728	146013	9.1e-122	440
isotig00400	SUNJ01004390.1	93.357	286	2	7	107	375	145728	146013	9.07e-112	407
isotig00401	SUNJ01004390.1	95.804	286	7	3	107	387	145728	146013	9.19e-127	457
isotig00402	SUNJ01004390.1	94.755	286	7	5	107	384	145728	146013	3.3e-121	438
isotig00403	SUNJ01004390.1	94.056	286	6	7	107	381	145728	146013	9.17e-117	424
isotig00404	SUNJ01004390.1	92.308	286	5	7	107	375	145728	146013	9.14e-107	390
isotig00405	SUNJ01004390.1	97.093	172	4	1	107	277	145728	145899	2.51e-76	289
isotig00406	SUNJ01004390.1	97.041	169	4	1	107	274	145728	145896	1.16e-74	283
isotig00407	SUNJ01004390.1	97.576	165	4	0	107	271	145728	145892	1.14e-74	283
isotig00408	SUNJ01004390.1	97.546	163	4	0	107	269	145728	145890	1.44e-73	279
isotig00409	SUNJ01004390.1	98.16	163	3	0	107	269	145728	145890	3.09e-75	285
isotig00410	SUNJ01004390.1	97.484	159	4	0	107	265	145728	145886	2.42e-71	272
isotig00411	SUNJ01004390.1	98.125	160	3	0	107	266	145728	145887	1.42e-73	279
isotig00412	SUNJ01004390.1	98.16	163	3	0	107	269	145728	145890	3.09e-75	285
isotig00413	SUNJ01004390.1	95.349	172	7	1	107	277	145728	145899	2.53e-71	272
isotig00414	SUNJ01004390.1	95.266	169	7	1	107	274	145728	145896	1.17e-69	267
isotig00415	SUNJ01004390.1	95.758	165	7	0	107	271	145728	145892	1.15e-69	267
isotig00416	SUNJ01004390.1	95.706	163	7	0	107	269	145728	145890	1.45e-68	263
isotig00417	SUNJ01004390.1	96.319	163	6	0	107	269	145728	145890	3.12e-70	268
isotig00418	SUNJ01004390.1	95.597	159	7	0	107	265	145728	145886	2.44e-66	255
isotig00419	SUNJ01004390.1	96.25	160	6	0	107	266	145728	145887	1.43e-68	263
isotig00420	SUNJ01004390.1	96.319	163	6	0	107	269	145728	145890	3.12e-70	268
isotig00421	SUNJ01004390.1	96.753	154	4	1	107	259	145728	145881	2.33e-66	255
isotig00422	SUNJ01004390.1	94.805	154	7	1	107	259	145728	145881	2.34e-61	239
isotig00423	SUNJ01001681.1	98.214	112	1	1	1	112	92594	92484	1.91e-48	195
isotig00474	SUNJ01000917.1	99.282	557	4	0	1	557	279442	279998	0	1007
isotig00475	SUNJ01003074.1	97.896	713	15	0	1	713	38711	39423	0	1234
isotig00495	SUNJ01015999.1	100	141	0	0	31	171	23018	23158	2.08e-67	261
isotig00496	SUNJ01015999.1	100	141	0	0	31	171	23018	23158	2.1e-67	261
isotig00497
isotig00498
isotig00499
isotig00500
isotig00503	SUNJ01015999.1	100	303	0	0	31	333	23018	23320	9.07e-158	560
isotig00504	SUNJ01002071.1	99.212	1015	7	1	58	1072	49058	48045	0	1829
isotig00505	SUNJ01002071.1	99.212	1015	7	1	58	1072	49058	48045	0	1829
isotig00506	SUNJ01002071.1	99.212	1015	7	1	58	1072	49058	48045	0	1829
isotig00507	SUNJ01006818.1	90.091	989	29	32	162	1091	48445	47467	0	1219
isotig00508	SUNJ01006818.1	90.091	989	22	34	162	1084	48445	47467	0	1214
isotig00509	SUNJ01006818.1	90.496	968	26	29	162	1074	48445	47489	0	1218
isotig00510	SUNJ01002071.1	99.212	1015	7	1	58	1072	49058	48045	0	1829
isotig00511	SUNJ01006818.1	89.8	1049	33	37	54	1042	48501	47467	0	1277
isotig00512	SUNJ01006818.1	89.8	1049	26	39	54	1035	48501	47467	0	1269
isotig00513	SUNJ01006818.1	90.175	1028	30	34	54	1025	48501	47489	0	1273
isotig00514	SUNJ01006818.1	87.682	1096	45	53	2	1030	48224	47152	0	1194
isotig00515	SUNJ01006818.1	87.58	1095	41	56	2	1023	48224	47152	0	1181
isotig00516	SUNJ01006818.1	86.355	1092	39	65	2	1002	48224	47152	0	1090
isotig00517	SUNJ01006818.1	86.264	1092	38	66	2	1000	48224	47152	0	1083
isotig00518	SUNJ01006818.1	92.888	703	21	16	2	683	48224	47530	0	994
isotig00519	SUNJ01006818.1	92.888	703	21	16	2	683	48224	47530	0	994
isotig00520	SUNJ01006818.1	91.525	767	31	21	2	743	48224	47467	0	1026
isotig00521	SUNJ01006818.1	91.525	767	24	23	2	736	48224	47467	0	1018
isotig00522	SUNJ01006818.1	92.091	746	28	18	2	726	48224	47489	0	1022
isotig00523	SUNJ01006818.1	89.474	342	6	8	162	480	48445	48111	4.25e-111	405
isotig00524	SUNJ01006818.1	88.806	402	10	13	54	431	48501	48111	7.98e-128	460
isotig00525	SUNJ01006229.1	99.669	1810	4	1	730	2537	6878	8687	0	3308
isotig00526	SUNJ01006229.1	99.669	1810	4	1	687	2494	6878	8687	0	3308
isotig00533	SUNJ01010881.1	100	255	0	0	141	395	13321	13067	1.08e-130	472
isotig00536	SUNJ01010881.1	99.605	253	1	0	88	340	13319	13067	6.21e-128	462
isotig00537	SUNJ01010881.1	100	255	0	0	141	395	13321	13067	9.85e-131	472
isotig00539	SUNJ01010881.1	99.605	253	1	0	88	340	13319	13067	5.62e-128	462
isotig00542	SUNJ01007124.1	98.075	831	12	4	1	830	32501	33328	0	1443
isotig00543	SUNJ01012871.1	99.389	491	2	1	302	792	308066	307577	0	889
isotig00544	SUNJ01012871.1	99.593	491	2	0	3	493	307577	308067	0	896
isotig00545	SUNJ01012871.1	95.012	421	20	1	302	722	308066	307647	0	660
isotig00546	SUNJ01001664.1	99.079	543	3	1	1	543	83937	84477	0	974
isotig00547	SUNJ01012871.1	95.012	421	21	0	378	798	308067	307647	0	662
isotig00548	SUNJ01007124.1	97.88	283	6	0	215	497	36733	37015	1.77e-136	490
isotig00549	SUNJ01001078.1	99.333	450	1	2	345	793	47624	47176	0	813
isotig00550	SUNJ01005003.1	97.81	548	7	5	1	543	86225	86772	0	941
isotig00551	SUNJ01004029.1	92.87	575	36	5	2	574	108999	108428	0	830
isotig00552	SUNJ01001078.1	99.177	243	0	2	286	527	47417	47176	1.66e-120	436
isotig00553	SUNJ01012871.1	98.571	490	6	1	2	490	308066	307577	0	865
isotig00554	SUNJ01004219.1	94.286	420	23	1	2	420	31171	30752	0	641
isotig00555	SUNJ01000650.1	99.561	1368	5	1	1439	2806	104009	105375	0	2492
isotig00556	SUNJ01000650.1	99.479	959	5	0	1439	2397	104009	104967	0	1744
isotig00557	SUNJ01000650.1	99.561	683	3	0	1439	2121	104009	104691	0	1245
isotig00558	SUNJ01000650.1	99.561	1368	5	1	1046	2413	104009	105375	0	2492
isotig00559	SUNJ01000650.1	99.479	959	5	0	1046	2004	104009	104967	0	1744
isotig00560	SUNJ01000650.1	99.561	1368	5	1	881	2248	104009	105375	0	2492
isotig00561	SUNJ01000650.1	99.561	683	3	0	1046	1728	104009	104691	0	1245
isotig00562	SUNJ01000650.1	99.561	1368	5	1	1030	2397	104009	105375	0	2492
isotig00563	SUNJ01000650.1	99.479	959	5	0	881	1839	104009	104967	0	1744
isotig00564	SUNJ01000650.1	99.561	1368	5	1	812	2179	104009	105375	0	2492
isotig00565	SUNJ01000650.1	99.561	683	3	0	881	1563	104009	104691	0	1245
isotig00566	SUNJ01000650.1	99.479	959	5	0	1030	1988	104009	104967	0	1744
isotig00567	SUNJ01000650.1	99.561	683	3	0	1030	1712	104009	104691	0	1245
isotig00568	SUNJ01000650.1	99.479	959	5	0	812	1770	104009	104967	0	1744
isotig00569	SUNJ01000650.1	99.561	683	3	0	812	1494	104009	104691	0	1245
isotig00570	SUNJ01004816.1	100	560	0	0	359	918	9263	9822	0	1035
isotig00571	SUNJ01004816.1	100	167	0	0	359	525	9263	9429	5.14e-82	309
isotig00572	SUNJ01004816.1	96.774	186	0	5	179	360	8772	8955	5.04e-81	305
isotig00573	SUNJ01004816.1	95.008	641	20	12	1	633	10650	11286	0	996
isotig00574	SUNJ01010165.1	96.819	503	16	0	1	503	31507	31005	0	841
isotig00575	SUNJ01010133.1	100	180	0	0	3	182	216120	216299	2e-89	333
isotig00576	SUNJ01011332.1	99.527	423	0	2	1	423	167723	168143	0	769
isotig00580
isotig00581
isotig00582
isotig00583
isotig00584
isotig00585
isotig00586
isotig00587
isotig00588
isotig00589
isotig00590
isotig00591
isotig00592
isotig00593	SUNJ01004639.1	99.292	424	2	1	1	424	46923	47345	0	765
isotig00594
isotig00595
isotig00596
isotig00597
isotig00598
isotig00599	SUNJ01004639.1	99.371	159	0	1	1	159	46923	47080	7.93e-76	287
isotig00600	SUNJ01010786.1	94.309	1933	107	3	3	1935	177890	175961	0	2957
isotig00601	SUNJ01010786.1	94.206	1933	107	4	3	1933	177890	175961	0	2944
isotig00602	SUNJ01012672.1	94.902	1942	86	8	1	1932	140791	138853	0	3025
isotig00603	SUNJ01014221.1	95.765	921	33	2	6	926	412148	413062	0	1480
isotig00604	SUNJ01014221.1	95.548	921	33	3	6	924	412148	413062	0	1467
isotig00605	SUNJ01014221.1	93.92	921	35	4	6	911	412148	413062	0	1371
isotig00606	SUNJ01014221.1	93.702	921	35	5	6	909	412148	413062	0	1358
isotig00607	SUNJ01014221.1	96.204	922	19	5	6	923	412148	413057	0	1495
isotig00608	SUNJ01007728.1	94.342	919	30	8	1	899	389796	390712	0	1389
isotig00609	SUNJ01007276.1	96.055	507	20	0	1	507	5787	6293	0	826
isotig00610	SUNJ01007276.1	95.661	507	20	1	1	505	5787	6293	0	813
isotig00611	SUNJ01008770.1	93.265	683	42	4	1	681	167161	166481	0	1003
isotig00612	SUNJ01007572.1	97.143	420	10	2	8	426	86794	87212	0	708
isotig00613	SUNJ01010142.1	96.68	241	8	0	1	241	21642	21402	3.61e-110	401
isotig00614	SUNJ01004141.1	98.246	228	4	0	1	228	37063	36836	8.84e-110	399
isotig00615	SUNJ01000883.1	98.414	1009	15	1	663	1670	3883	4891	0	1773
isotig00616	SUNJ01000883.1	97.768	224	5	0	1112	1335	4668	4891	4.7e-105	387
isotig00617	SUNJ01000883.1	97.768	224	5	0	1110	1333	4668	4891	4.7e-105	387
isotig00618	SUNJ01003199.1	99.023	307	3	0	842	1148	47743	48049	1.41e-154	551
isotig00619	SUNJ01003199.1	99.023	307	3	0	839	1145	47743	48049	1.41e-154	551
isotig00620	SUNJ01013160.1	92.529	937	42	23	40	952	258324	257392	0	1317
isotig00621	SUNJ01003199.1	100	145	0	0	673	817	23392	23536	1.35e-69	268
isotig00622	SUNJ01003199.1	100	148	0	0	668	815	23389	23536	2.9e-71	274
isotig00623	SUNJ01013160.1	93.743	879	40	12	40	910	258324	257453	0	1304
isotig00624	SUNJ01009595.1	99.5	200	1	0	635	834	25551	25352	1.29e-98	364
isotig00625
isotig00626	SUNJ01003199.1	99.023	307	3	0	103	409	47743	48049	5.7e-155	551
isotig00627	SUNJ01003199.1	98.324	179	3	0	112	290	47871	48049	6.2e-84	315
isotig00628	SUNJ01014144.1	99.455	734	2	2	11	743	63454	64186	0	1332
isotig00629	SUNJ01014144.1	99.591	734	2	1	2	735	63454	64186	0	1338
isotig00630	SUNJ01014144.1	99.588	728	2	1	4	731	63460	64186	0	1327
isotig00631	SUNJ01014144.1	99.046	734	4	3	11	742	63454	64186	0	1314
isotig00632	SUNJ01014144.1	99.046	734	4	3	11	742	63454	64186	0	1314
isotig00633	SUNJ01014144.1	99.183	734	4	2	2	734	63454	64186	0	1321
isotig00634	SUNJ01014144.1	99.183	734	4	2	2	734	63454	64186	0	1321
isotig00635	SUNJ01014144.1	99.176	728	4	2	4	730	63460	64186	0	1310
isotig00636	SUNJ01014144.1	99.176	728	4	2	4	730	63460	64186	0	1310
isotig00637	SUNJ01014144.1	98.638	734	7	3	11	742	63454	64186	0	1297
isotig00638	SUNJ01014144.1	98.774	734	7	2	2	734	63454	64186	0	1304
isotig00639	SUNJ01014144.1	98.764	728	7	2	4	730	63460	64186	0	1293
isotig00640	SUNJ01014144.1	98.774	734	8	1	2	735	63454	64186	0	1304
isotig00641	SUNJ01013046.1	96.927	716	12	9	1	712	34642	35351	0	1192
isotig00642	SUNJ01011191.1	99.2	250	1	1	11	259	27031	26782	1.92e-124	449
isotig00643	SUNJ01011191.1	99.6	250	1	0	2	251	27031	26782	1.13e-126	457
isotig00644	SUNJ01011191.1	99.59	244	1	0	4	247	27025	26782	2.42e-123	446
isotig00645	SUNJ01011191.1	98	250	3	2	11	258	27031	26782	1.93e-119	433
isotig00646	SUNJ01014583.1	98.79	248	1	2	11	257	50614	50368	1.16e-121	440
isotig00647	SUNJ01004356.1	98.785	247	3	0	2	248	19816	19570	1.13e-121	440
isotig00648	SUNJ01014583.1	99.194	248	1	1	2	249	50614	50368	2.44e-123	446
isotig00649	SUNJ01004356.1	98.755	241	3	0	4	244	19810	19570	2.43e-118	429
isotig00650	SUNJ01014583.1	99.174	242	1	1	4	245	50608	50368	5.23e-120	435
isotig00651	SUNJ01006568.1	97.581	248	4	2	11	257	65636	65390	1.16e-116	424
isotig00652	SUNJ01006568.1	97.984	248	4	1	2	249	65636	65390	2.46e-118	429
isotig00653	SUNJ01006568.1	97.934	242	4	1	4	245	65630	65390	5.27e-115	418
isotig00654	SUNJ01006568.1	97.992	249	3	2	2	250	65636	65390	6.84e-119	431
isotig00655	SUNJ01013046.1	93.913	230	7	6	1	226	34642	34868	1.12e-91	340
isotig00657	SUNJ01002111.1	98.799	916	7	4	3	915	353257	352343	0	1628
isotig00658	SUNJ01014134.1	98.8	917	6	5	3	914	93495	94411	0	1628
isotig00659	SUNJ01014134.1	98.21	894	13	3	3	893	93518	94411	0	1559
isotig00660	SUNJ01014134.1	99.217	894	4	3	3	893	93518	94411	0	1609
isotig00663	SUNJ01003929.1	92.746	896	22	30	3	876	43341	44215	0	1254
isotig00666	SUNJ01010029.1	91.822	538	34	9	3	533	204695	204161	0	743
isotig00667	SUNJ01013115.1	98.456	259	3	1	3	260	200748	201006	3.49e-126	455
isotig00668	SUNJ01001819.1	98.17	601	11	0	3	603	280674	281274	0	1050
isotig00669	SUNJ01002543.1	99.148	352	3	0	8	359	6820	6469	5.16e-180	634
isotig00670	SUNJ01001819.1	97.917	384	8	0	3	386	280674	281057	0	665
isotig00671	SUNJ01010029.1	86.667	555	57	16	3	551	204695	204152	5.85e-170	601
isotig00672	SUNJ01010046.1	97.504	561	12	2	8	567	121586	121027	0	957
isotig00673	SUNJ01010029.1	98.011	352	6	1	8	358	204678	204327	9.36e-173	610
isotig00674	SUNJ01010029.1	91.321	530	28	11	8	529	204678	204159	0	710
isotig00675	SUNJ01014596.1	96.97	165	5	0	229	393	9487	9651	8.13e-73	278
isotig00676	SUNJ01014668.1	94.249	313	17	1	128	439	233321	233633	8.08e-133	477
isotig00677	SUNJ01014596.1	96.97	165	5	0	192	356	9487	9651	7.34e-73	278
isotig00678	SUNJ01014668.1	94.265	279	16	0	124	402	233355	233633	7.51e-118	427
isotig00679	SUNJ01011445.1	99.048	315	1	2	453	766	66586	66273	1.09e-158	564
isotig00680	SUNJ01011445.1	99.354	774	2	3	100	871	67045	66273	0	1399
isotig00681	SUNJ01001755.1	98.02	202	3	1	456	656	28262	28061	2.8e-94	350
isotig00682	SUNJ01012970.1	98.02	202	4	0	263	464	40751	40550	6.59e-95	351
isotig00684	SUNJ01003826.1	98.522	203	3	0	278	480	19572	19370	3.95e-97	359
isotig00687	SUNJ01012970.1	97.525	202	5	0	263	464	40751	40550	2.55e-93	346
isotig00688	SUNJ01000941.1	97.613	377	9	0	137	513	241885	241509	0	647
isotig00689	SUNJ01009106.1	100	406	0	0	23	428	187387	187792	0	750
isotig00690	SUNJ01009106.1	100	406	0	0	23	428	187387	187792	0	750
isotig00691	SUNJ01009106.1	99.65	286	1	0	107	392	187507	187792	1.3e-146	523
isotig00692	SUNJ01009106.1	100	336	0	0	23	358	187387	187722	4.44e-176	621
isotig00693	SUNJ01009106.1	100	336	0	0	23	358	187387	187722	4.44e-176	621
isotig00694	SUNJ01009106.1	100	156	0	0	304	459	187843	187998	4.3e-76	289
isotig00695	SUNJ01009106.1	100	156	0	0	303	458	187843	187998	4.29e-76	289
isotig00696	SUNJ01009106.1	100	156	0	0	304	459	187843	187998	4.3e-76	289
isotig00697	SUNJ01009106.1	100	156	0	0	303	458	187843	187998	4.29e-76	289
isotig00698	SUNJ01009106.1	99.537	216	1	0	107	322	187507	187722	9.79e-108	394
isotig00699	SUNJ01009106.1	100	156	0	0	268	423	187843	187998	3.94e-76	289
isotig00700	SUNJ01009106.1	100	581	0	0	23	603	187387	187967	0	1074
isotig00701	SUNJ01009106.1	100	156	0	0	267	422	187843	187998	3.93e-76	289
isotig00702	SUNJ01009106.1	100	156	0	0	261	416	187843	187998	3.87e-76	289
isotig00703	SUNJ01009106.1	100	581	0	0	23	603	187387	187967	0	1074
isotig00704	SUNJ01009106.1	100	156	0	0	260	415	187843	187998	3.86e-76	289
isotig00705	SUNJ01009106.1	100	156	0	0	261	416	187843	187998	3.87e-76	289
isotig00706	SUNJ01009106.1	100	156	0	0	260	415	187843	187998	3.86e-76	289
isotig00707	SUNJ01009106.1	99.783	461	1	0	107	567	187507	187967	0	846
isotig00708	SUNJ01009106.1	100	156	0	0	225	380	187843	187998	3.52e-76	289
isotig00709	SUNJ01009106.1	100	336	0	0	23	358	187387	187722	4.58e-176	621
isotig00710	SUNJ01009106.1	100	156	0	0	224	379	187843	187998	3.51e-76	289
isotig00711	SUNJ01009106.1	100	336	0	0	23	358	187387	187722	4.58e-176	621
isotig00712	SUNJ01009106.1	100	263	0	0	216	478	187705	187967	1.48e-135	486
isotig00713	SUNJ01009106.1	100	262	0	0	216	477	187706	187967	5.3e-135	484
isotig00714	SUNJ01009106.1	100	269	0	0	23	291	187387	187655	7e-139	497
isotig00715	SUNJ01009106.1	100	263	0	0	216	478	187705	187967	1.48e-135	486
isotig00716	SUNJ01009106.1	100	262	0	0	216	477	187706	187967	5.3e-135	484
isotig00717	SUNJ01009106.1	99.537	216	1	0	107	322	187507	187722	1.01e-107	394
isotig00718	SUNJ01009106.1	100	269	0	0	23	291	187387	187655	7e-139	497
isotig00719	SUNJ01009106.1	100	263	0	0	180	442	187705	187967	1.36e-135	486
isotig00720	SUNJ01009106.1	100	262	0	0	180	441	187706	187967	4.87e-135	484
isotig00721	SUNJ01009106.1	100	156	0	0	299	454	187843	187998	4.23e-76	289
isotig00722	SUNJ01009106.1	100	204	0	0	232	435	187764	187967	8.39e-103	377
isotig00723	SUNJ01009106.1	100	204	0	0	231	434	187764	187967	8.37e-103	377
isotig00724	SUNJ01009106.1	100	204	0	0	232	435	187764	187967	8.39e-103	377
isotig00725	SUNJ01009106.1	100	204	0	0	231	434	187764	187967	8.37e-103	377
isotig00726	SUNJ01009106.1	100	204	0	0	196	399	187764	187967	7.65e-103	377
isotig00727	SUNJ01009106.1	100	204	0	0	195	398	187764	187967	7.63e-103	377
isotig00728	SUNJ01009106.1	100	156	0	0	260	415	187843	187998	3.84e-76	289
isotig00729	SUNJ01009106.1	100	156	0	0	260	415	187843	187998	3.84e-76	289
isotig00730	SUNJ01009106.1	100	156	0	0	224	379	187843	187998	3.49e-76	289
isotig00731	SUNJ01009106.1	100	146	0	0	23	168	187387	187532	1.11e-70	270
isotig00732	SUNJ01009106.1	100	146	0	0	23	168	187387	187532	1.11e-70	270
isotig00733	SUNJ01009106.1	100	125	0	0	176	300	187843	187967	4.63e-59	231
isotig00740	SUNJ01012311.1	98.896	1359	14	1	499	1856	41743	43101	0	2425
isotig00748	SUNJ01007056.1	99.593	982	2	2	40	1021	94612	93633	0	1790
isotig00749
isotig00750
isotig00751	SUNJ01004806.1	99.31	145	1	0	2	146	81103	80959	6.39e-68	263
isotig00752	SUNJ01004806.1	99.31	145	1	0	2	146	81103	80959	6.39e-68	263
isotig00753
isotig00754	SUNJ01008252.1	75.14	358	72	15	791	1140	83264	82916	1.5e-34	152
isotig00755	SUNJ01004806.1	99.31	145	1	0	2	146	81103	80959	6.39e-68	263
isotig00756	SUNJ01004806.1	99.31	145	1	0	2	146	81103	80959	6.41e-68	263
isotig00757	SUNJ01008252.1	85.294	102	13	2	791	891	83264	83164	3.63e-20	104
isotig00758	SUNJ01004806.1	99.31	145	1	0	2	146	81103	80959	5.42e-68	263
isotig00759
isotig00760	SUNJ01004806.1	99.31	145	1	0	2	146	81103	80959	1.76e-68	263
isotig00761	SUNJ01004476.1	95.545	1010	34	10	1	1005	109146	110149	0	1605
isotig00763	SUNJ01004476.1	96.545	1013	21	11	1	1005	109146	110152	0	1664
isotig00764	SUNJ01007680.1	97.821	780	10	6	1	778	31421	32195	0	1339
isotig00765	SUNJ01009487.1	95.285	509	22	2	660	1167	102320	101813	0	806
isotig00767	SUNJ01004476.1	94.653	1010	40	11	1	1002	109146	110149	0	1554
isotig00768	SUNJ01007680.1	97.564	780	11	7	1	777	31421	32195	0	1328
isotig00771	SUNJ01015966.1	93.211	383	19	5	8	386	327508	327129	1.77e-156	556
isotig00772	SUNJ01009189.1	91.371	394	16	15	2	384	31194	31580	1.04e-146	523
isotig00777	SUNJ01005982.1	98.585	424	6	0	450	873	349821	350244	0	750
isotig00778	SUNJ01012688.1	99.273	275	0	1	4	276	39382	39656	3.15e-138	496
isotig00779	SUNJ01012688.1	100	275	0	0	4	278	39382	39656	4.06e-142	508
isotig00780	SUNJ01012688.1	99.273	275	0	1	4	276	39382	39656	2.5e-138	496
isotig00781	SUNJ01012688.1	100	275	0	0	4	278	39382	39656	3.22e-142	508
isotig00782	SUNJ01012688.1	99.273	275	0	1	4	276	39382	39656	2.47e-138	496
isotig00783	SUNJ01012688.1	100	275	0	0	4	278	39382	39656	3.19e-142	508
isotig00784	SUNJ01010137.1	98.628	802	8	3	83	882	77538	76738	0	1417
isotig00785	SUNJ01005982.1	97.391	575	14	1	243	817	349671	350244	0	977
isotig00786	SUNJ01005982.1	98.585	424	6	0	318	741	349821	350244	0	750
isotig00787	SUNJ01005760.1	99.294	425	3	0	307	731	122188	121764	0	769
isotig00788	SUNJ01008309.1	92.996	514	14	10	16	508	27102	27614	0	730
isotig00789	SUNJ01005380.1	94.559	533	19	10	1	531	3728	3204	0	815
isotig00790	SUNJ01015966.1	98.856	437	2	3	2	438	512664	513097	0	776
isotig00791	SUNJ01010004.1	97.846	325	4	3	1	325	267989	268310	4.47e-157	558
isotig00792	SUNJ01008309.1	92.727	495	14	10	16	489	27102	27595	0	695
isotig00793	SUNJ01013361.1	89.764	635	44	19	1	624	118328	117704	0	793
isotig00794	SUNJ01010004.1	98.63	365	5	0	292	656	268019	268383	0	647
isotig00795	SUNJ01005380.1	94.714	681	26	10	1	679	3728	3056	0	1050
isotig00796	SUNJ01015966.1	98.804	418	2	3	2	419	512664	513078	0	741
isotig00797	SUNJ01010004.1	98.291	585	7	3	2	586	267802	268383	0	1022
isotig00798	SUNJ01003756.1	93.993	283	9	6	16	297	70348	70073	3.99e-116	422
isotig00799	SUNJ01008309.1	91.924	421	15	8	16	417	27102	27522	3.49e-161	571
isotig00800	SUNJ01014118.1	96.667	90	3	0	90	179	60042	60131	7.4e-35	150
isotig00806	SUNJ01003921.1	99.471	189	0	1	694	882	167045	166858	7.88e-92	342
isotig00807	SUNJ01003921.1	99.038	104	1	0	142	245	181174	181071	1.95e-45	187
isotig00811	SUNJ01015378.1	99.516	1032	5	0	2	1033	213150	214181	0	1879
isotig00812	SUNJ01008423.1	98.98	294	2	1	96	388	275367	275660	3.29e-147	525
isotig00813	SUNJ01008423.1	98.99	297	2	1	96	391	275367	275663	7.02e-149	531
isotig00814	SUNJ01008423.1	98.94	283	2	1	96	377	275378	275660	4.19e-141	505
isotig00815	SUNJ01008423.1	98.951	286	2	1	96	380	275378	275663	8.93e-143	510
isotig00816	SUNJ01008423.1	100	136	0	0	218	353	275525	275660	5.72e-65	252
isotig00817	SUNJ01008423.1	100	139	0	0	218	356	275525	275663	1.22e-66	257
isotig00818	SUNJ01008423.1	100	136	0	0	207	342	275525	275660	5.58e-65	252
isotig00819	SUNJ01008423.1	98.98	294	2	1	80	372	275367	275660	3.18e-147	525
isotig00820	SUNJ01008423.1	100	139	0	0	207	345	275525	275663	1.19e-66	257
isotig00821	SUNJ01008423.1	98.99	297	2	1	80	375	275367	275663	6.78e-149	531
isotig00822	SUNJ01008423.1	100	136	0	0	202	337	275525	275660	5.51e-65	252
isotig00823	SUNJ01008423.1	100	139	0	0	202	340	275525	275663	1.17e-66	257
isotig00824	SUNJ01008423.1	91.628	215	2	1	80	278	297317	297531	1.16e-74	283
isotig00825	SUNJ01003941.1	97.015	201	2	2	64	260	605890	606090	2.92e-90	335
isotig00826	SUNJ01007168.1	94.578	3412	157	22	322	3726	235118	238508	0	5251
isotig00827	SUNJ01007168.1	94.576	3466	159	22	322	3778	235118	238563	0	5332
isotig00828	SUNJ01007168.1	94.606	3467	159	22	322	3781	235118	238563	0	5341
isotig00829	SUNJ01000189.1	95.498	2510	102	9	3	2506	13566	11062	0	3999
isotig00830	SUNJ01000189.1	95.4	2565	104	10	3	2558	13566	11007	0	4071
isotig00831	SUNJ01000189.1	95.517	2565	104	9	3	2561	13566	11007	0	4089
isotig00832	SUNJ01001023.1	89.337	1932	170	16	91	2018	173919	172020	0	2394
isotig00833	SUNJ01000189.1	96.02	804	31	1	3	806	13566	12764	0	1306
isotig00834	SUNJ01000189.1	97.244	508	12	1	92	597	11569	11062	0	859
isotig00835	SUNJ01000189.1	96.625	563	14	2	92	649	11569	11007	0	929
isotig00836	SUNJ01000189.1	97.158	563	14	1	92	652	11569	11007	0	950
isotig00837	SUNJ01006286.1	98.035	458	8	1	1	458	62948	62492	0	795
isotig00838	SUNJ01015596.1	98.833	514	6	0	133	646	20510	19997	0	917
isotig00839	SUNJ01006286.1	97.271	513	10	2	1	510	62948	62437	0	867
isotig00840	SUNJ01006286.1	97.856	513	10	1	1	513	62948	62437	0	885
isotig00841	SUNJ01005598.1	99.111	900	7	1	34	933	71768	72666	0	1616
isotig00842	SUNJ01005598.1	99.111	900	7	1	34	933	71768	72666	0	1616
isotig00843	SUNJ01005598.1	99.111	900	7	1	34	933	71768	72666	0	1616
isotig00844	SUNJ01003954.1	99.488	1757	6	3	267	2023	431553	429800	0	3192
isotig00845	SUNJ01005598.1	99.111	900	7	1	34	933	71768	72666	0	1616
isotig00846	SUNJ01005598.1	99.111	900	7	1	34	933	71768	72666	0	1616
isotig00847	SUNJ01002015.1	99.13	345	2	1	467	811	19711	19368	2.43e-175	619
isotig00848	SUNJ01002015.1	88.676	574	13	39	296	842	19916	19368	0	652
isotig00849	SUNJ01003351.1	96.121	232	6	2	83	311	4972	5203	5.75e-102	375
isotig00850	SUNJ01003351.1	96.121	232	6	2	83	311	4972	5203	5.99e-102	375
isotig00854	SUNJ01008805.1	98.056	720	8	6	2	717	805072	805789	0	1247
isotig00855	SUNJ01002807.1	94.637	634	26	6	12	642	101115	100487	0	976
isotig00858	SUNJ01008805.1	96.746	676	16	6	2	673	805072	805745	0	1122
isotig00860	SUNJ01013425.1	97.576	330	3	5	2	328	25920	26247	1.05e-157	560
isotig00862	SUNJ01010952.1	99.66	294	1	0	284	577	3185	2892	6.91e-151	538
isotig00863	SUNJ01010952.1	99.66	294	1	0	309	602	3185	2892	7.14e-151	538
isotig00865	SUNJ01015561.1	97.335	713	17	1	925	1637	206848	206138	0	1210
isotig00866	SUNJ01008263.1	94.698	547	24	4	1051	1596	6590	7132	0	845
isotig00867	SUNJ01015561.1	97.457	1455	30	6	925	2377	206848	205399	0	2475
isotig00868	SUNJ01015561.1	97.258	1240	27	6	1099	2336	206633	205399	0	2095
isotig00869	SUNJ01015561.1	97.454	707	16	1	184	890	206842	206138	0	1205
isotig00870	SUNJ01008263.1	94.698	547	24	4	304	849	6590	7132	0	845
isotig00871	SUNJ01015561.1	97.335	713	17	1	3	715	206848	206138	0	1210
isotig00872	SUNJ01015561.1	97.454	707	16	1	6	712	206842	206138	0	1205
isotig00873	SUNJ01008263.1	94.698	547	24	4	129	674	6590	7132	0	845
isotig00874	SUNJ01008263.1	94.698	547	24	4	126	671	6590	7132	0	845
isotig00875	SUNJ01007357.1	98.664	1198	15	1	685	1881	3043	1846	0	2122
isotig00876	SUNJ01015561.1	97.516	1449	29	6	184	1630	206842	205399	0	2470
isotig00877	SUNJ01015561.1	97.258	1240	27	6	352	1589	206633	205399	0	2095
isotig00878	SUNJ01015561.1	97.457	1455	30	6	3	1455	206848	205399	0	2475
isotig00879	SUNJ01015561.1	97.516	1449	29	6	6	1452	206842	205399	0	2470
isotig00880	SUNJ01015561.1	97.258	1240	27	6	177	1414	206633	205399	0	2095
isotig00881	SUNJ01015561.1	97.258	1240	27	6	174	1411	206633	205399	0	2095
isotig00882	SUNJ01014397.1	99.7	333	1	0	15	347	51822	51490	1.84e-172	610
isotig00886	SUNJ01001814.1	98.466	326	3	2	312	635	126489	126814	2.48e-161	573
isotig00887	SUNJ01001814.1	98.466	326	3	2	312	635	126489	126814	2.47e-161	573
isotig00888	SUNJ01001814.1	98.466	326	3	2	312	635	126489	126814	2.44e-161	573
isotig00889	SUNJ01001814.1	98.466	326	3	2	312	635	126489	126814	2.44e-161	573
isotig00890	SUNJ01001814.1	98.466	326	3	2	312	635	126489	126814	2.44e-161	573
isotig00891	SUNJ01001814.1	98.958	192	2	0	561	752	129103	129294	1.78e-92	344
isotig00892	SUNJ01001814.1	98.958	192	2	0	561	752	129103	129294	1.77e-92	344
isotig00893	SUNJ01001814.1	98.71	310	3	1	561	870	129103	129411	3.45e-154	549
isotig00894	SUNJ01001814.1	98.706	309	3	1	561	868	129103	129411	1.24e-153	547
isotig00895	SUNJ01001814.1	98.706	309	3	1	561	868	129103	129411	1.24e-153	547
isotig00896	SUNJ01004890.1	100	137	0	0	12	148	139586	139450	4.4e-66	254
isotig00897	SUNJ01004890.1	100	133	0	0	12	144	139586	139454	7.06e-64	246
isotig00898	SUNJ01010512.1	87.984	2813	75	236	2	2663	25622	28322	0	3079
isotig00899	SUNJ01009505.1	100	1509	0	0	79	1587	3824	5332	0	2787
isotig00900	SUNJ01009505.1	99.933	1501	1	0	76	1576	3832	5332	0	2767
isotig00901	SUNJ01009505.1	100	1560	0	0	282	1841	3773	5332	0	2881
isotig00902	SUNJ01009505.1	100	1509	0	0	79	1587	3824	5332	0	2787
isotig00903	SUNJ01009505.1	99.933	1501	1	0	76	1576	3832	5332	0	2767
isotig00904	SUNJ01009505.1	99.201	1251	6	4	966	2214	32440	33688	0	2252
isotig00905	SUNJ01009505.1	99.201	1251	6	4	952	2200	32440	33688	0	2252
isotig00906	SUNJ01009505.1	100	1033	0	0	360	1392	4300	5332	0	1908
isotig00907	SUNJ01009505.1	100	1033	0	0	346	1378	4300	5332	0	1908
isotig00908	SUNJ01008281.1	99.851	669	0	1	726	1393	156196	155528	0	1229
isotig00909	SUNJ01008281.1	99.501	1602	7	1	4	1605	157128	155528	0	2913
isotig00910	SUNJ01008281.1	99.851	669	0	1	472	1139	156196	155528	0	1229
isotig00911	SUNJ01008281.1	99.851	669	0	1	461	1128	156196	155528	0	1229
isotig00912	SUNJ01009505.1	98.727	707	6	3	2	707	32984	33688	0	1253
isotig00913	SUNJ01004231.1	100	942	0	0	16	957	52043	51102	0	1740
isotig00914	SUNJ01004231.1	100	943	0	0	16	958	52043	51101	0	1742
isotig00915	SUNJ01004231.1	100	942	0	0	16	957	52043	51102	0	1740
isotig00916	SUNJ01004231.1	100	943	0	0	16	958	52043	51101	0	1742
isotig00917	SUNJ01015080.1	99.659	881	3	0	130	1010	124871	123991	0	1611
isotig00918	SUNJ01015080.1	99.597	992	4	0	1	992	124982	123991	0	1810
isotig00919	SUNJ01015080.1	99.659	881	3	0	130	1010	124871	123991	0	1611
isotig00920	SUNJ01015080.1	99.597	992	4	0	1	992	124982	123991	0	1810
isotig00921	SUNJ01008753.1	99.504	1008	2	1	485	1492	31014	32018	0	1831
isotig00922	SUNJ01008753.1	99.504	1008	2	1	485	1492	31014	32018	0	1831
isotig00923	SUNJ01004231.1	98.295	821	13	1	1	820	37531	36711	0	1437
isotig00924	SUNJ01004231.1	98.295	821	13	1	1	820	37531	36711	0	1437
isotig00925	SUNJ01010537.1	100	223	0	0	649	871	78681	78459	4.74e-113	412
isotig00926	SUNJ01008939.1	99.383	324	2	0	3	326	20353	20676	6.36e-166	588
isotig00927	SUNJ01000693.1	96.58	614	2	1	1	614	46809	47403	0	1000
isotig00928	SUNJ01000693.1	98.161	435	7	1	201	634	46969	47403	0	758
isotig00929	SUNJ01000693.1	97.213	610	2	1	1	610	46809	47403	0	1018
isotig00930	SUNJ01000693.1	97.727	440	8	2	193	630	46964	47403	0	756
isotig00931	SUNJ01000693.1	99.496	595	2	1	1	594	46809	47403	0	1081
isotig00932	SUNJ01000693.1	96.254	614	4	2	1	614	46809	47403	0	989
isotig00933	SUNJ01000693.1	98.824	595	2	1	1	590	46809	47403	0	1055
isotig00934	SUNJ01000693.1	96.727	611	4	3	1	611	46809	47403	0	1003
isotig00935	SUNJ01000693.1	97.967	246	4	1	1	245	46809	47054	2.45e-117	425
isotig00936	SUNJ01000693.1	97.967	246	4	1	1	245	46809	47054	2.43e-117	425
isotig00937	SUNJ01000693.1	97.967	246	4	1	1	245	46809	47054	2.31e-117	425
isotig00938	SUNJ01000693.1	91.594	345	1	3	1	345	46809	47125	3.78e-125	451
isotig00939	SUNJ01005429.1	99.164	1196	9	1	1	1195	61105	59910	0	2152
isotig00940	SUNJ01005429.1	100	191	0	0	897	1087	55174	54984	4.78e-95	353
isotig00941	SUNJ01005429.1	99.262	1084	7	1	1	1083	61105	60022	0	1956
isotig00942	SUNJ01013602.1	86.207	348	43	4	528	874	58624	58967	8.37e-101	372
isotig00943	SUNJ01013602.1	97.309	446	6	3	121	561	58180	58624	0	752
isotig00944	SUNJ01013160.1	95.325	1262	40	17	149	1397	304064	305319	0	1986
isotig00945	SUNJ01013160.1	96.659	1347	31	14	1	1340	303980	305319	0	2226
isotig00946	SUNJ01007509.1	97.245	1343	29	8	1	1338	129603	130942	0	2268
isotig00947	SUNJ01013160.1	94.733	1348	51	19	1	1336	303980	305319	0	2078
isotig00948	SUNJ01010277.1	93.51	755	36	11	149	893	97631	98382	0	1110
isotig00949	SUNJ01013160.1	95.357	840	31	8	1	836	303980	304815	0	1328
isotig00950	SUNJ01001999.1	96.062	838	28	5	1	834	27486	26650	0	1360
isotig00951	SUNJ01013160.1	92.271	841	51	13	1	832	303980	304815	0	1181
isotig00952	SUNJ01008566.1	92.553	470	22	9	149	607	7137	7604	0	662
isotig00953	SUNJ01008049.1	95.429	700	21	9	1	694	23492	22798	0	1105
isotig00954	SUNJ01008049.1	92.286	700	39	14	1	690	23492	22798	0	979
isotig00955	SUNJ01013160.1	92.11	545	31	10	149	683	304064	304606	0	758
isotig00956	SUNJ01011302.1	95.541	628	23	5	1	626	59499	60123	0	1000
isotig00957	SUNJ01013160.1	91.284	631	42	12	1	622	303980	304606	0	848
isotig00958	SUNJ01001441.1	95.035	282	8	6	141	420	206385	206662	4.75e-121	438
isotig00959	SUNJ01001303.1	95.105	429	20	1	140	567	27973	28401	0	675
isotig00960	SUNJ01015582.1	96.053	152	5	1	224	374	101654	101805	2.81e-63	246
isotig00961	SUNJ01001303.1	96.656	299	9	1	224	521	28103	28401	2.69e-138	496
isotig00962	SUNJ01015582.1	96.078	153	5	1	87	239	101654	101805	5.55e-64	248
isotig00963	SUNJ01001303.1	96.667	300	9	1	87	386	28103	28401	5.45e-139	497
isotig00964	SUNJ01006426.1	97.987	149	2	1	91	239	76113	76260	9.22e-67	257
isotig00965	SUNJ01004901.1	97.521	121	3	0	202	322	69677	69557	8.4e-52	207
isotig00966	SUNJ01001303.1	97.315	298	7	1	89	386	28105	28401	3.25e-141	505
isotig00967	SUNJ01001303.1	96.97	264	8	0	87	350	28138	28401	6.48e-123	444
isotig00968	SUNJ01015582.1	94.079	152	9	0	86	237	101654	101805	5.46e-59	231
isotig00969	SUNJ01013149.1	98.333	180	2	1	61	239	208404	208583	5.35e-84	315
isotig00970	SUNJ01015203.1	97.11	692	7	2	954	1632	138830	139521	0	1155
isotig00971	SUNJ01015203.1	97.11	692	7	2	900	1578	138830	139521	0	1155
isotig00972	SUNJ01015203.1	97.11	692	7	2	485	1163	138830	139521	0	1155
isotig00973	SUNJ01007658.1	99.698	331	1	0	639	969	24533	24863	2.74e-171	606
isotig00974	SUNJ01004371.1	94.654	767	41	0	1	767	118949	119715	0	1190
isotig00975	SUNJ01007658.1	99.698	331	1	0	585	915	24533	24863	2.61e-171	606
isotig00976	SUNJ01007658.1	100	324	0	0	177	500	24540	24863	2.7e-169	599
isotig00977	SUNJ01001841.1	99.648	284	0	1	240	523	54951	54669	7.03e-145	518
isotig00978	SUNJ01001841.1	99.647	283	0	1	41	323	54950	54669	1.7e-144	516
isotig00979	SUNJ01009070.1	99.754	406	1	0	109	514	9216	8811	0	745
isotig00981	SUNJ01009070.1	99.754	406	1	0	109	514	9216	8811	0	745
isotig00983	SUNJ01007935.1	99.45	1090	6	0	1	1090	29493	28404	0	1980
isotig00984	SUNJ01007935.1	98.718	702	8	1	1	702	29493	28793	0	1245
isotig00985	SUNJ01015966.1	99.468	188	1	0	88	275	353927	354114	5.67e-92	342
isotig00986	SUNJ01007205.1	99.362	470	1	1	393	862	112945	112478	0	850
isotig00987	SUNJ01002382.1	99.742	388	1	0	846	1233	20624	21011	0	712
isotig00988	SUNJ01001363.1	99.396	828	5	0	1	828	199857	200684	0	1502
isotig00989	SUNJ01002382.1	99.742	388	1	0	937	1324	20624	21011	0	712
isotig00990	SUNJ01001363.1	97.403	154	3	1	1	154	199857	200009	1.09e-67	261
isotig00991	SUNJ01002382.1	99.711	346	1	0	134	479	18350	18695	6.81e-180	634
isotig00992	SUNJ01000885.1	99.02	204	2	0	33	236	299863	300066	2.42e-99	366
isotig00993	SUNJ01000885.1	99.02	204	2	0	33	236	299863	300066	2.42e-99	366
isotig00994	SUNJ01000885.1	99.02	204	2	0	33	236	299863	300066	2.42e-99	366
isotig00995	SUNJ01000885.1	99.02	204	2	0	33	236	299863	300066	2.42e-99	366
isotig00996	SUNJ01000885.1	99.02	204	2	0	33	236	299863	300066	2.13e-99	366
isotig00997	SUNJ01000885.1	99.02	204	2	0	33	236	299863	300066	2.13e-99	366
isotig00998	SUNJ01000885.1	95.855	193	3	5	66	257	317238	317426	6.82e-82	307
isotig00999	SUNJ01000433.1	96.373	193	2	5	130	321	564439	564251	1.73e-83	313
isotig01000	SUNJ01002228.1	98.649	518	6	1	7	524	101400	100884	0	917
isotig01001	SUNJ01001445.1	97.273	110	2	1	836	944	31100	31209	1.22e-44	185
isotig01002	SUNJ01002228.1	98.649	518	6	1	7	524	101400	100884	0	917
isotig01003	SUNJ01002228.1	98.456	518	7	1	7	524	101400	100884	0	911
isotig01004	SUNJ01002228.1	98.259	517	9	0	9	525	101400	100884	0	905
isotig01005	SUNJ01002228.1	98.649	518	7	0	7	524	101400	100883	0	918
isotig01006	SUNJ01002228.1	98	350	7	0	9	358	101400	101051	2.2e-172	608
isotig01007	SUNJ01013240.1	99.807	518	0	1	139	655	57966	58483	0	950
isotig01008	SUNJ01013240.1	99.807	518	0	1	139	655	57966	58483	0	950
isotig01009	SUNJ01013240.1	99.388	654	3	1	2	654	57830	58483	0	1184
isotig01010	SUNJ01013240.1	99.388	654	3	1	2	654	57830	58483	0	1184
isotig01011	SUNJ01013240.1	100	423	0	0	139	561	57966	58388	0	782
isotig01012	SUNJ01013240.1	100	423	0	0	139	561	57966	58388	0	782
isotig01013	SUNJ01013240.1	100	400	0	0	139	538	57966	58365	0	739
isotig01014	SUNJ01013240.1	100	400	0	0	139	538	57966	58365	0	739
isotig01015	SUNJ01013240.1	99.463	559	3	0	2	560	57830	58388	0	1016
isotig01016	SUNJ01013240.1	99.463	559	3	0	2	560	57830	58388	0	1016
isotig01017	SUNJ01013240.1	99.44	536	3	0	2	537	57830	58365	0	974
isotig01018	SUNJ01013240.1	99.44	536	3	0	2	537	57830	58365	0	974
isotig01019	SUNJ01000654.1	96.4	1778	43	6	153	1913	420	2193	0	2909
isotig01020	SUNJ01000654.1	96.567	1777	40	6	153	1911	420	2193	0	2924
isotig01021	SUNJ01014190.1	94.454	1749	74	5	152	1883	57382	55640	0	2671
isotig01025	SUNJ01000654.1	95.819	1411	53	6	1	1409	787	2193	0	2274
isotig01026	SUNJ01011341.1	96.105	1412	44	11	1	1408	49048	47644	0	2292
isotig01027	SUNJ01014190.1	94.424	1381	69	5	1	1379	57014	55640	0	2117
isotig01028	SUNJ01000654.1	94.048	924	34	4	153	1055	420	1343	0	1382
isotig01031	SUNJ01014710.1	99.573	234	1	0	143	376	8963	9196	2.36e-117	427
isotig01032	SUNJ01014710.1	99.573	234	1	0	143	376	8963	9196	2.36e-117	427
isotig01033	SUNJ01014710.1	99.573	234	1	0	143	376	8963	9196	2.36e-117	427
isotig01034	SUNJ01014710.1	99.573	234	1	0	143	376	8963	9196	2.36e-117	427
isotig01035	SUNJ01014710.1	99.573	234	1	0	143	376	8963	9196	2.36e-117	427
isotig01036	SUNJ01014710.1	99.573	234	1	0	143	376	8963	9196	2.36e-117	427
isotig01037	SUNJ01014710.1	97.938	291	6	0	837	1127	49754	50044	9.9e-141	505
isotig01038	SUNJ01014710.1	99.573	234	1	0	143	376	8963	9196	1.85e-117	427
isotig01039	SUNJ01014710.1	97.619	210	5	0	334	543	55834	56043	1.08e-97	361
isotig01040	SUNJ01014710.1	97.619	210	5	0	334	543	55834	56043	1.08e-97	361
isotig01041	SUNJ01014710.1	97.619	210	5	0	334	543	55834	56043	1.08e-97	361
isotig01042	SUNJ01014710.1	99.573	234	1	0	143	376	8963	9196	1.2e-117	427
isotig01043	SUNJ01008086.1	95.258	485	21	2	1	485	61458	61940	0	767
isotig01044	SUNJ01008086.1	95.258	485	21	2	1	485	61458	61940	0	767
isotig01045	SUNJ01012496.1	97.313	335	9	0	1163	1497	139410	139744	5.48e-160	569
isotig01046	SUNJ01012496.1	97.313	335	9	0	1128	1462	139410	139744	5.37e-160	569
isotig01047	SUNJ01012496.1	97.313	335	9	0	726	1060	139410	139744	4.11e-160	569
isotig01048	SUNJ01012496.1	97.313	335	9	0	691	1025	139410	139744	4e-160	569
isotig01049	SUNJ01012496.1	97.313	335	9	0	585	919	139410	139744	3.66e-160	569
isotig01050	SUNJ01012496.1	97.313	335	9	0	550	884	139410	139744	3.55e-160	569
isotig01051	SUNJ01008086.1	95.258	485	21	2	1	485	61458	61940	0	767
isotig01052	SUNJ01005373.1	99.083	218	2	0	2	219	17101	16884	6.67e-107	392
isotig01053	SUNJ01000950.1	97.857	280	6	0	128	407	129238	129517	9.71e-135	484
isotig01059	SUNJ01003893.1	99.686	318	1	0	542	859	66683	67000	7.06e-164	582
isotig01060	SUNJ01003893.1	99.686	318	1	0	542	859	66683	67000	7.06e-164	582
isotig01061	SUNJ01003893.1	99.49	196	1	0	72	267	81697	81892	1.58e-96	357
isotig01066	SUNJ01001110.1	99.394	330	2	0	868	1197	19805	20134	6.7e-169	599
isotig01067	SUNJ01001110.1	100	372	0	0	1337	1708	20340	20711	0	688
isotig01068	SUNJ01005470.1	97.099	586	11	3	1	582	45656	45073	0	983
isotig01069	SUNJ01005470.1	97.099	586	11	3	1	582	45656	45073	0	983
isotig01083	SUNJ01002285.1	95.524	715	18	13	2	706	117451	116741	0	1131
isotig01084	SUNJ01007072.1	96.022	553	20	2	60	611	3540	4091	0	898
isotig01085	SUNJ01007072.1	94.662	562	19	11	60	620	3540	4091	0	861
isotig01086	SUNJ01002285.1	97.534	365	8	1	231	594	117105	116741	1.35e-176	623
isotig01087	SUNJ01015203.1	98.889	270	2	1	231	499	167561	167292	7.17e-134	481
isotig01088	SUNJ01015203.1	95.699	279	2	10	231	508	167561	167292	1.24e-121	440
isotig01089	SUNJ01015203.1	97.778	315	7	0	206	520	167606	167292	9.42e-153	544
isotig01090	SUNJ01013336.1	98.95	381	2	1	60	438	2326	2706	0	680
isotig01091	SUNJ01015203.1	98.276	290	3	1	86	373	167581	167292	8.67e-142	507
isotig01092	SUNJ01013336.1	96.667	390	3	10	60	448	2326	2706	0	640
isotig01093	SUNJ01015203.1	95.318	299	4	10	86	383	167581	167292	1.52e-129	466
isotig01094	SUNJ01009001.1	99.423	693	3	1	555	1246	123476	122784	0	1256
isotig01095	SUNJ01009001.1	99.423	693	3	1	438	1129	123476	122784	0	1256
isotig01096	SUNJ01009001.1	99.421	691	3	1	555	1244	123476	122786	0	1253
isotig01097	SUNJ01009001.1	99.421	691	3	1	438	1127	123476	122786	0	1253
isotig01098	SUNJ01009001.1	99.346	765	4	1	1	764	123548	122784	0	1384
isotig01099	SUNJ01009001.1	99.345	763	4	1	1	762	123548	122786	0	1380
isotig01100	SUNJ01011132.1	99.495	396	2	0	257	652	286932	287327	0	721
isotig01101	SUNJ01011132.1	99.626	535	2	0	1	535	286793	287327	0	977
isotig01102	SUNJ01011132.1	100	103	0	0	1	103	286793	286895	6.57e-47	191
isotig01103	SUNJ01000901.1	97.059	238	7	0	272	509	7162	6925	1.27e-109	401
isotig01104	SUNJ01000901.1	97.059	238	7	0	272	509	7162	6925	1.27e-109	401
isotig01105	SUNJ01000901.1	97.059	238	7	0	272	509	7162	6925	1.24e-109	401
isotig01106	SUNJ01000901.1	97.059	238	7	0	272	509	7162	6925	1.24e-109	401
isotig01107	SUNJ01000901.1	97.034	236	7	0	272	507	7162	6927	1.48e-108	398
isotig01108	SUNJ01000901.1	97.034	236	7	0	272	507	7162	6927	1.44e-108	398
isotig01109	SUNJ01000901.1	95.61	205	6	2	1	203	2529	2326	3.29e-87	326
isotig01110
isotig01111	SUNJ01007103.1	97.156	422	11	1	468	888	52341	51920	0	712
isotig01112	SUNJ01007103.1	98.707	1083	10	1	63	1141	53002	51920	0	1919
isotig01113	SUNJ01007103.1	97.156	422	11	1	390	810	52341	51920	0	712
isotig01114	SUNJ01015071.1	98.365	367	4	2	266	631	36160	35795	0	643
isotig01115	SUNJ01015071.1	100	201	0	0	266	466	56224	56024	4.2e-101	372
isotig01116	SUNJ01015071.1	99.156	237	1	1	348	583	35881	35645	4.01e-117	425
isotig01117	SUNJ01015071.1	99.485	388	2	0	1	388	56411	56024	0	706
isotig01118	SUNJ01009509.1	99.459	185	1	0	282	466	155865	155681	1.93e-90	337
isotig01119	SUNJ01009509.1	99.678	311	1	0	209	519	155991	155681	1.91e-160	569
isotig01120	SUNJ01009509.1	99.459	185	1	0	275	459	155865	155681	1.9e-90	337
isotig01121	SUNJ01009509.1	99.459	185	1	0	207	391	155865	155681	1.67e-90	337
isotig01122	SUNJ01009509.1	99.705	339	1	0	174	512	156019	155681	5.14e-176	621
isotig01123	SUNJ01009509.1	99.752	404	1	0	41	444	156084	155681	0	741
isotig01124	SUNJ01009509.1	99.459	185	1	0	246	430	155865	155681	1.8e-90	337
isotig01125	SUNJ01009509.1	99.459	185	1	0	101	285	155865	155681	1.3e-90	337
isotig01126	SUNJ01012230.1	99.548	221	1	0	494	714	329063	329283	2.36e-110	403
isotig01127	SUNJ01012230.1	99.548	221	1	0	494	714	329063	329283	2.33e-110	403
isotig01128	SUNJ01012230.1	99.095	221	1	1	494	713	329063	329283	3.95e-108	396
isotig01129	SUNJ01012230.1	99.095	221	1	1	494	713	329063	329283	3.89e-108	396
isotig01130	SUNJ01012230.1	99.548	221	1	0	393	613	329063	329283	2.02e-110	403
isotig01131	SUNJ01012230.1	99.548	221	1	0	393	613	329063	329283	1.99e-110	403
isotig01132	SUNJ01012230.1	99.329	149	1	0	1	149	329135	329283	4.87e-71	270
isotig01133	SUNJ01012230.1	99.329	149	1	0	1	149	329135	329283	4.47e-71	270
isotig01134	SUNJ01003231.1	99.495	198	1	0	231	428	12365	12562	8.3e-98	361
isotig01135	SUNJ01003231.1	99.495	198	1	0	231	428	12365	12562	8.59e-98	361
isotig01136	SUNJ01003231.1	99.5	200	1	0	231	430	12365	12564	6.5e-99	364
isotig01137	SUNJ01003231.1	98.522	203	1	2	231	433	12365	12565	1.09e-96	357
isotig01138	SUNJ01003231.1	99.502	201	1	0	231	431	12365	12565	1.8e-99	366
isotig01139	SUNJ01003231.1	99.495	198	1	0	231	428	12365	12562	8.36e-98	361
isotig01140	SUNJ01003231.1	98.99	198	1	1	231	428	12365	12561	1.38e-95	353
isotig01141	SUNJ01003231.1	98.522	203	3	0	231	433	58850	59052	3.01e-97	359
isotig01142	SUNJ01007402.1	99.644	281	1	0	530	810	6248	5968	1.52e-143	514
isotig01143	SUNJ01007402.1	99.301	286	2	0	6	291	6253	5968	5.78e-145	518
isotig01144	SUNJ01007402.1	99.65	286	1	0	6	291	6253	5968	1.24e-146	523
isotig01145	SUNJ01007402.1	98.958	288	1	1	4	291	6253	5968	7.47e-144	514
isotig01146	SUNJ01007402.1	99.65	286	1	0	3	288	6253	5968	1.23e-146	523
isotig01147	SUNJ01013603.1	98.667	375	2	3	1	373	257598	257971	0	662
isotig01148	SUNJ01013603.1	98.299	529	4	5	1	527	257598	258123	0	922
isotig01150	SUNJ01015469.1	100	952	0	0	902	1853	130484	129533	0	1759
isotig01153	SUNJ01014265.1	98.703	617	7	1	1	616	93356	93972	0	1094
isotig01154	SUNJ01000809.1	92.661	327	2	16	15	322	63310	62987	5.92e-125	451
isotig01155	SUNJ01000809.1	92.049	327	4	16	15	322	63310	62987	1.28e-121	440
isotig01156	SUNJ01000809.1	90.942	276	2	17	15	271	63310	63039	1.97e-94	350
isotig01157	SUNJ01009272.1	99.167	120	1	0	13	132	141021	140902	1.89e-54	217
isotig01158	SUNJ01002967.1	98.108	1374	16	9	4	1373	20974	19607	0	2385
isotig01159	SUNJ01002967.1	97.671	1374	21	10	5	1373	20974	19607	0	2350
isotig01160	SUNJ01002967.1	98.035	1374	17	9	4	1373	20974	19607	0	2379
isotig01161	SUNJ01002967.1	97.598	1374	22	10	5	1373	20974	19607	0	2344
isotig01162	SUNJ01007731.1	92.111	1445	21	81	20	1389	198140	196714	0	1951
isotig01163	SUNJ01007731.1	92.042	1445	22	81	20	1389	198140	196714	0	1945
isotig01164	SUNJ01002967.1	99.407	1011	2	4	122	1132	20613	19607	0	1831
isotig01165	SUNJ01002967.1	99.407	1011	2	4	120	1130	20613	19607	0	1831
isotig01166	SUNJ01002967.1	99.308	1011	3	4	122	1132	20613	19607	0	1825
isotig01167	SUNJ01002967.1	99.308	1011	3	4	120	1130	20613	19607	0	1825
isotig01168	SUNJ01002967.1	96.203	474	14	3	4	475	20973	20502	0	773
isotig01169	SUNJ01002967.1	94.947	475	19	4	5	476	20974	20502	0	739
isotig01178	SUNJ01009881.1	99.608	255	0	1	176	430	35833	36086	6.15e-129	464
isotig01179	SUNJ01009881.1	99.608	255	0	1	143	397	35833	36086	5.65e-129	464
isotig01180	SUNJ01012960.1	98.925	558	3	1	1	558	188958	189512	0	994
isotig01181	SUNJ01012960.1	98.925	558	3	1	1	558	188958	189512	0	994
isotig01182	SUNJ01012960.1	98.925	558	3	1	1	558	188958	189512	0	994
isotig01183	SUNJ01013907.1	99.533	214	0	1	3	216	788598	788386	1.13e-105	388
isotig01184	SUNJ01012960.1	98.925	558	3	1	1	558	188958	189512	0	994
isotig01185	SUNJ01000781.1	100	207	0	0	875	1081	16690	16484	4.64e-104	383
isotig01186	SUNJ01013907.1	99.533	214	0	1	3	216	788598	788386	8.19e-106	388
isotig01187	SUNJ01000781.1	98.352	182	3	0	477	658	39686	39505	2.55e-85	320
isotig01188	SUNJ01013907.1	99.533	214	0	1	3	216	788598	788386	6.68e-106	388
isotig01189	SUNJ01000781.1	100	150	0	0	310	459	46549	46400	1.22e-72	278
isotig01190	SUNJ01012494.1	95.789	190	8	0	85	274	1542	1353	1.06e-81	307
isotig01191	SUNJ01004602.1	98.701	385	5	0	65	449	4610	4994	0	684
isotig01192	SUNJ01004602.1	99.732	373	1	0	371	743	5027	5399	0	684
isotig01193	SUNJ01004602.1	98.701	385	5	0	65	449	4610	4994	0	684
isotig01194	SUNJ01004602.1	99.732	373	1	0	371	743	5027	5399	0	684
isotig01195	SUNJ01004602.1	98.701	385	5	0	65	449	4610	4994	0	684
isotig01196	SUNJ01004602.1	99.732	373	1	0	371	743	5027	5399	0	684
isotig01197	SUNJ01001449.1	99.579	475	1	1	825	1299	58635	58162	0	865
isotig01198	SUNJ01001449.1	99.579	475	1	1	747	1221	58635	58162	0	865
isotig01199	SUNJ01000147.1	100	138	0	0	329	466	113816	113679	5.1e-66	255
isotig01200	SUNJ01005751.1	100	249	0	0	781	1029	31339	31587	3.52e-127	460
isotig01201	SUNJ01015931.1	98.282	291	5	0	1	291	59577	59287	3.51e-142	510
isotig01202	SUNJ01005751.1	100	249	0	0	552	800	31339	31587	3.07e-127	460
isotig01205	SUNJ01014035.1	100	235	0	0	485	719	281792	281558	8.3e-120	435
isotig01206	SUNJ01015931.1	98.282	291	5	0	1	291	59577	59287	1.4e-142	510
isotig01207	SUNJ01014035.1	100	234	0	0	257	490	281791	281558	2e-119	433
isotig01208	SUNJ01008500.1	98.077	312	1	5	841	1151	158013	158320	1.13e-150	538
isotig01209	SUNJ01009900.1	99.656	291	1	0	2	292	202657	202947	4.62e-149	532
isotig01210	SUNJ01009900.1	99.656	291	1	0	2	292	202657	202947	4.54e-149	532
isotig01211	SUNJ01009900.1	99.656	291	1	0	2	292	202657	202947	4.25e-149	532
isotig01212	SUNJ01008500.1	98.077	312	1	5	512	822	158013	158320	8.41e-151	538
isotig01213	SUNJ01007282.1	98.295	176	3	0	3	178	4328	4503	5.99e-82	309
isotig01214	SUNJ01007282.1	98.295	176	3	0	3	178	4328	4503	5.83e-82	309
isotig01215	SUNJ01007282.1	98.295	176	3	0	3	178	4328	4503	5.31e-82	309
isotig01216	SUNJ01008500.1	99.259	135	1	0	228	362	163268	163402	7.64e-63	244
isotig01217	SUNJ01008640.1	99.794	1455	2	1	383	1837	460212	461665	0	2669
isotig01218	SUNJ01008640.1	99.794	1455	2	1	369	1823	460212	461665	0	2669
isotig01219	SUNJ01006945.1	98.392	311	5	0	1	311	198081	198391	7.52e-154	547
isotig01220	SUNJ01006945.1	98.316	297	5	0	1	297	198081	198377	4.43e-146	521
isotig01221	SUNJ01006945.1	98.392	311	5	0	1	311	198081	198391	7.34e-154	547
isotig01222	SUNJ01006945.1	98.316	297	5	0	1	297	198081	198377	4.32e-146	521
isotig01223	SUNJ01006945.1	98.392	311	5	0	1	311	198081	198391	7.66e-154	547
isotig01224	SUNJ01006945.1	98.316	297	5	0	1	297	198081	198377	4.52e-146	521
isotig01225	SUNJ01006945.1	98.63	365	5	0	1	365	198081	198445	0	647
isotig01226	SUNJ01012442.1	100	196	0	0	664	859	264120	264315	5.86e-98	363
isotig01227	SUNJ01005221.1	97.849	279	5	1	1	279	57096	56819	1.5e-133	481
isotig01228	SUNJ01012442.1	98.964	193	1	1	664	856	278090	278281	1.72e-92	344
isotig01229	SUNJ01005221.1	97.849	279	5	1	1	279	57096	56819	1.2e-133	481
isotig01230	SUNJ01012635.1	98.329	359	5	1	170	528	100277	100634	4.18e-178	628
isotig01231	SUNJ01012635.1	96.349	493	16	2	1	493	100144	100634	0	809
isotig01232	SUNJ01004588.1	97.037	270	7	1	1	270	228873	228605	1.94e-125	453
isotig01233	SUNJ01003044.1	96.45	169	5	1	1	169	14950	15117	1.07e-72	278
isotig01234	SUNJ01007509.1	98.897	272	3	0	1	272	129694	129423	1.51e-135	486
isotig01235	SUNJ01012819.1	98.71	465	4	2	1	463	32063	31599	0	824
isotig01236	SUNJ01012819.1	98.28	465	5	3	1	462	32063	31599	0	811
isotig01237	SUNJ01012819.1	98.263	403	6	1	1	403	32063	31662	0	704
isotig01238	SUNJ01012611.1	95.354	495	22	1	51	544	23443	23937	0	785
isotig01239	SUNJ01012819.1	98.06	464	7	2	1	463	31160	30698	0	806
isotig01240	SUNJ01012819.1	96.61	354	12	0	1	354	32063	31710	2.84e-166	588
isotig01241	SUNJ01012819.1	96.045	354	13	1	1	353	32063	31710	2.2e-162	575
isotig01242	SUNJ01012819.1	95.48	354	16	0	1	354	32063	31710	1.33e-159	566
isotig01243	SUNJ01012819.1	97.429	350	8	1	1	350	32063	31715	1.67e-168	595
isotig01248	SUNJ01008944.1	99.552	893	4	0	630	1522	91382	90490	0	1628
isotig01249	SUNJ01009504.1	99.706	1020	3	0	1	1020	1385	366	0	1868
isotig01250	SUNJ01009504.1	99.884	860	1	0	1	860	1385	526	0	1583
isotig01251	SUNJ01001773.1	88.929	551	45	8	229	772	203619	204160	0	665
isotig01252	SUNJ01001773.1	89.455	550	44	6	229	772	203619	204160	0	682
isotig01253	SUNJ01001773.1	89.273	550	44	7	229	771	203619	204160	0	675
isotig01254	SUNJ01001773.1	88.929	551	45	8	229	772	203619	204160	0	665
isotig01255	SUNJ01001773.1	88.829	555	45	9	229	775	203619	204164	0	665
isotig01256	SUNJ01001773.1	89.35	554	44	7	229	775	203619	204164	0	682
isotig01257	SUNJ01001773.1	89.17	554	44	8	229	774	203619	204164	0	676
isotig01258	SUNJ01001773.1	88.829	555	45	9	229	775	203619	204164	0	665
isotig01259	SUNJ01003790.1	98.712	1398	1	3	430	1825	76069	77451	0	2466
isotig01260	SUNJ01003790.1	98.712	1398	1	3	379	1774	76069	77451	0	2466
isotig01261	SUNJ01005700.1	99.08	326	1	2	190	515	193322	192999	6.02e-165	584
isotig01262	SUNJ01005700.1	99.385	325	1	1	189	513	193322	192999	4.64e-166	588
isotig01263	SUNJ01005700.1	98.769	325	1	2	190	512	193322	192999	3.6e-162	575
isotig01264	SUNJ01005700.1	99.074	324	1	1	189	510	193322	192999	7.72e-164	580
isotig01265	SUNJ01003790.1	97.537	203	4	1	236	438	74019	73818	2.38e-93	346
isotig01266	SUNJ01005777.1	98.956	383	3	1	107	489	113069	112688	0	684
isotig01267	SUNJ01005777.1	98.956	383	3	1	107	489	113069	112688	0	684
isotig01268	SUNJ01005777.1	98.956	383	3	1	107	489	113069	112688	0	684
isotig01269	SUNJ01003308.1	98.006	351	4	3	1	350	99765	99417	2.25e-171	606
isotig01270	SUNJ01009943.1	96.216	185	6	1	1	185	133602	133419	7.86e-80	302
isotig01271	SUNJ01009943.1	96.216	185	6	1	1	185	133602	133419	7.87e-80	302
isotig01272	SUNJ01009943.1	96.216	185	6	1	1	185	133602	133419	7.54e-80	302
isotig01273	SUNJ01003347.1	98.052	154	3	0	102	255	263474	263627	4.93e-70	268
isotig01274	SUNJ01000810.1	99.375	320	2	0	1	320	15564	15883	6.48e-164	580
isotig01275	SUNJ01000810.1	99.375	320	2	0	1	320	15564	15883	6.46e-164	580
isotig01276	SUNJ01000810.1	99.375	320	2	0	1	320	15564	15883	6.48e-164	580
isotig01277	SUNJ01000810.1	99.375	320	2	0	1	320	15564	15883	6.46e-164	580
isotig01278	SUNJ01000810.1	98.876	534	4	2	1	532	15564	16097	0	952
isotig01279	SUNJ01000810.1	98.828	256	3	0	1	256	15628	15883	9.73e-127	457
isotig01282	SUNJ01009900.1	99.913	1147	1	0	576	1722	201833	200687	0	2113
isotig01283	SUNJ01009900.1	99.916	1197	1	0	270	1466	201883	200687	0	2206
isotig01285	SUNJ01015521.1	98.447	322	4	1	3	323	101433	101754	3.34e-159	566
isotig01286	SUNJ01015521.1	98.447	322	4	1	3	323	101433	101754	3.18e-159	566
isotig01287	SUNJ01007943.1	98.765	243	1	2	36	276	47414	47172	8.75e-119	431
isotig01288	SUNJ01009900.1	92.308	390	0	28	1	390	201046	200687	6.96e-148	527
isotig01289	SUNJ01001318.1	99.738	382	1	0	1086	1467	52289	51908	0	701
isotig01290	SUNJ01002279.1	98.364	489	5	2	463	949	188025	187538	0	856
isotig01291	SUNJ01011138.1	99.788	472	1	0	463	934	3351	2880	0	867
isotig01292	SUNJ01005321.1	99.593	492	1	1	12	502	55492	55001	0	896
isotig01293	SUNJ01002279.1	98.569	489	4	2	115	601	188025	187538	0	861
isotig01294	SUNJ01011138.1	99.576	472	2	0	115	586	3351	2880	0	861
isotig01295	SUNJ01002474.1	97.5	320	4	3	1	317	31021	31339	5.56e-153	544
isotig01296	SUNJ01015163.1	86.667	180	24	0	378	557	3161	3340	3.38e-49	200
isotig01297	SUNJ01000836.1	97.826	92	1	1	1	92	45829	45919	1.72e-36	158
isotig01298	SUNJ01015163.1	86.667	180	24	0	378	557	3161	3340	3e-49	200
isotig01299	SUNJ01000836.1	97.826	92	1	1	1	92	45829	45919	1.68e-36	158
isotig01300	SUNJ01000836.1	97.826	92	1	1	1	92	45829	45919	1.61e-36	158
isotig01301	SUNJ01015163.1	93.75	80	5	0	200	279	7959	7880	9.69e-26	121
isotig01302	SUNJ01006925.1	99.705	678	2	0	267	944	111223	110546	0	1242
isotig01303	SUNJ01006925.1	99.536	862	4	0	2	863	111407	110546	0	1570
isotig01304	SUNJ01009990.1	92.857	266	15	4	1	262	66522	66257	1.04e-104	383
isotig01305	SUNJ01009990.1	94.361	266	12	3	1	263	66522	66257	2.22e-111	405
isotig01306	SUNJ01006293.1	93.585	265	15	2	2	264	71428	71164	4.83e-108	394
isotig01307	SUNJ01009990.1	93.985	266	15	1	1	265	66522	66257	2.9e-110	401
isotig01308	SUNJ01009990.1	98.502	267	3	1	1	267	66522	66257	7.89e-131	470
isotig01309	SUNJ01009475.1	98.52	811	11	1	1209	2019	53289	52480	0	1430
isotig01310	SUNJ01009475.1	98.52	811	11	1	1039	1849	53289	52480	0	1430
isotig01311	SUNJ01009475.1	98.604	788	10	1	834	1621	53266	52480	0	1393
isotig01312	SUNJ01009475.1	98.604	788	10	1	664	1451	53266	52480	0	1393
isotig01313	SUNJ01012634.1	99.742	387	1	0	94	480	20236	19850	0	710
isotig01314	SUNJ01012634.1	99.742	387	1	0	94	480	20236	19850	0	710
isotig01315	SUNJ01009667.1	86.012	2352	230	83	826	3104	14995	12670	0	2429
isotig01316	SUNJ01002240.1	99.57	698	2	1	434	1130	19228	19925	0	1271
isotig01317	SUNJ01002240.1	99.57	698	2	1	411	1107	19228	19925	0	1271
isotig01318	SUNJ01000738.1	100	412	0	0	376	787	303072	303483	0	761
isotig01319	SUNJ01000738.1	100	412	0	0	330	741	303072	303483	0	761
isotig01320	SUNJ01011132.1	100	123	0	0	3	125	381464	381342	5.27e-58	228
isotig01325	SUNJ01002734.1	98.453	517	5	1	674	1187	44656	45172	0	907
isotig01326	SUNJ01015280.1	99.272	412	3	0	377	788	5934	5523	0	745
isotig01327	SUNJ01000525.1	100	461	0	0	92	552	2240	2700	0	852
isotig01328	SUNJ01000525.1	99.658	292	1	0	884	1175	4917	5208	2.78e-149	534
isotig01329	SUNJ01000525.1	100	461	0	0	92	552	2240	2700	0	852
isotig01330	SUNJ01000525.1	100	274	0	0	92	365	2240	2513	2.97e-141	507
isotig01331	SUNJ01015235.1	94.915	1180	30	7	958	2118	147785	148953	0	1820
isotig01332	SUNJ01008873.1	97.11	1661	18	8	1	1649	18747	17105	0	2774
isotig01333	SUNJ01015752.1	99.188	1231	4	4	111	1341	17366	16142	0	2213
isotig01335	SUNJ01010554.1	100	297	0	0	116	412	101299	101595	2.39e-154	549
isotig01336	SUNJ01008873.1	99.16	238	2	0	147	384	17342	17105	3.43e-118	429
isotig01337	SUNJ01006861.1	98.377	616	10	0	6	621	132924	132309	0	1083
isotig01338	SUNJ01006861.1	98.377	616	10	0	6	621	132924	132309	0	1083
isotig01339	SUNJ01008162.1	89.778	450	35	7	357	797	96510	96063	3.13e-159	566
isotig01340	SUNJ01003756.1	98.347	242	1	3	118	359	108977	108739	6.59e-116	422
isotig01341	SUNJ01008162.1	88.889	450	37	8	252	691	96509	96063	4.55e-152	542
isotig01342	SUNJ01011488.1	93.613	501	27	5	2	499	401341	401839	0	743
isotig01343	SUNJ01012700.1	99.492	197	1	0	1	197	1705	1509	1.25e-96	359
isotig01344	SUNJ01012700.1	99.492	197	1	0	1	197	1705	1509	1.01e-96	359
isotig01346	SUNJ01015658.1	100	197	0	0	613	809	628829	629025	1.25e-98	364
isotig01347	SUNJ01015658.1	98.987	395	4	0	189	583	625626	626020	0	708
isotig01348	SUNJ01015658.1	100	300	0	0	82	381	628726	629025	3.13e-156	555
isotig01349	SUNJ01010876.1	99.538	865	4	0	1	865	284538	283674	0	1576
isotig01350	SUNJ01010876.1	99.538	865	4	0	1	865	284538	283674	0	1576
isotig01351	SUNJ01010876.1	99.568	926	4	0	1	926	284538	283613	0	1688
isotig01352	SUNJ01010876.1	99.567	924	4	0	1	924	284538	283615	0	1685
isotig01353	SUNJ01010876.1	99.501	802	4	0	1	802	284538	283737	0	1459
isotig01354	SUNJ01003920.1	99.182	489	2	1	1096	1584	94106	93620	0	880
isotig01355	SUNJ01003920.1	98.497	599	6	3	714	1312	102303	101708	0	1053
isotig01356	SUNJ01003920.1	99.443	539	2	1	347	885	102459	101922	0	977
isotig01357	SUNJ01003920.1	99.204	754	4	2	347	1100	102459	101708	0	1358
isotig01358	SUNJ01009782.1	96.252	507	16	3	1	505	97257	96752	0	828
isotig01359	SUNJ01012609.1	97.253	364	9	1	3	365	7649	8012	2.93e-174	616
isotig01360	SUNJ01004745.1	93.75	512	13	10	1	494	4680	4170	0	750
isotig01361	SUNJ01009782.1	95.858	507	18	3	1	505	97257	96752	0	817
isotig01362	SUNJ01012609.1	97.253	364	9	1	3	365	7649	8012	2.46e-174	616
isotig01363	SUNJ01003360.1	93.023	516	16	8	1	497	7090	7604	0	736
isotig01364	SUNJ01009782.1	95.703	512	14	5	1	510	97257	96752	0	817
isotig01365	SUNJ01012609.1	97.253	364	9	1	3	365	7649	8012	2.24e-174	616
isotig01366	SUNJ01004745.1	92.788	513	13	11	1	495	4680	4174	0	721
isotig01367	SUNJ01012609.1	96.31	542	18	2	1	540	17310	17851	0	889
isotig01368	SUNJ01012609.1	97.253	364	9	1	3	365	7649	8012	2.06e-174	616
isotig01369	SUNJ01012609.1	92.379	538	19	13	5	524	17318	17851	0	747
isotig01370	SUNJ01008252.1	98.396	374	6	0	1	374	88359	87986	0	658
isotig01371	SUNJ01008252.1	98.396	374	6	0	1	374	88359	87986	0	658
isotig01372	SUNJ01008252.1	98.396	374	6	0	1	374	88359	87986	0	658
isotig01373	SUNJ01008252.1	98.396	374	6	0	1	374	88359	87986	0	658
isotig01374	SUNJ01008252.1	98.396	374	6	0	1	374	88359	87986	0	658
isotig01375	SUNJ01008252.1	95.07	284	12	2	217	499	83264	82982	2.73e-123	446
isotig01376	SUNJ01008252.1	98.396	374	6	0	1	374	88359	87986	0	658
isotig01377	SUNJ01008252.1	95.07	284	12	2	138	420	83264	82982	2.29e-123	446
isotig01378	SUNJ01008252.1	95.341	279	11	2	98	375	83259	82982	2.64e-122	442
isotig01379	SUNJ01008252.1	86.411	287	37	2	254	540	81812	81528	3e-83	313
isotig01380	SUNJ01008252.1	86.411	287	37	2	175	461	81812	81528	2.54e-83	313
isotig01381	SUNJ01014141.1	99.886	877	1	0	1627	2503	36041	35165	0	1615
isotig01382	SUNJ01014141.1	99.886	877	1	0	1627	2503	36041	35165	0	1615
isotig01383	SUNJ01014141.1	99.886	877	1	0	1233	2109	36041	35165	0	1615
isotig01384	SUNJ01014141.1	99.886	877	1	0	1233	2109	36041	35165	0	1615
isotig01385	SUNJ01008748.1	100	282	0	0	127	408	102566	102285	5.21e-146	521
isotig01386	SUNJ01009261.1	98.168	382	4	3	3	382	360784	360404	0	664
isotig01387	SUNJ01009261.1	98.723	235	2	1	331	564	355181	354947	2.33e-114	416
isotig01388	SUNJ01009261.1	93.762	513	9	19	3	492	360784	360272	0	749
isotig01389	SUNJ01009261.1	91.292	356	9	18	110	443	360627	360272	1.77e-129	466
isotig01390	SUNJ01007689.1	99.667	1203	2	2	3	1204	277979	279180	0	2198
isotig01391	SUNJ01009261.1	99.451	910	5	0	1	910	192179	191270	0	1653
isotig01392	SUNJ01007689.1	99.667	1203	2	2	3	1204	277979	279180	0	2198
isotig01393	SUNJ01015999.1	99.702	672	2	0	719	1390	76643	75972	0	1230
isotig01394	SUNJ01015999.1	99.702	672	2	0	692	1363	76643	75972	0	1230
isotig01395	SUNJ01009261.1	99.374	1119	6	1	1	1119	192179	191062	0	2026
isotig01396	SUNJ01005767.1	99.175	727	4	1	566	1292	12860	13584	0	1308
isotig01397	SUNJ01005767.1	99.175	727	4	1	539	1265	12860	13584	0	1308
isotig01398	SUNJ01011881.1	99.534	429	2	0	194	622	20252	20680	0	782
isotig01399	SUNJ01011881.1	99.534	429	2	0	194	622	20252	20680	0	782
isotig01400	SUNJ01011881.1	99.798	494	1	0	1	494	21572	22065	0	907
isotig01401	SUNJ01011881.1	99.798	494	1	0	1	494	21572	22065	0	907
isotig01402	SUNJ01009812.1	99.588	486	2	0	3	488	60665	60180	0	887
isotig01403	SUNJ01009812.1	99.383	486	3	0	3	488	60665	60180	0	881
isotig01404	SUNJ01009812.1	99.187	492	4	0	3	494	60665	60174	0	887
isotig01405	SUNJ01009812.1	98.984	492	5	0	3	494	60665	60174	0	881
isotig01406	SUNJ01011796.1	98.99	198	2	0	14	211	78189	78386	1.19e-95	355
isotig01407	SUNJ01011796.1	99.482	193	1	0	163	355	79447	79639	1.49e-94	351
isotig01408	SUNJ01011796.1	98.99	198	2	0	14	211	78189	78386	7.17e-96	355
isotig01409	SUNJ01011796.1	98.99	198	2	0	14	211	78189	78386	6.53e-96	355
isotig01410	SUNJ01011796.1	99.482	193	1	0	163	355	79447	79639	8.71e-95	351
isotig01411	SUNJ01011796.1	98.99	198	2	0	14	211	78189	78386	6.03e-96	355
isotig01412	SUNJ01011796.1	99.482	193	1	0	163	355	79447	79639	7.89e-95	351
isotig01413	SUNJ01011796.1	99.482	193	1	0	163	355	79447	79639	7.26e-95	351
isotig01414	SUNJ01012803.1	100	205	0	0	291	495	213311	213515	4.52e-103	379
isotig01415	SUNJ01012803.1	100	137	0	0	155	291	213118	213254	2.74e-65	254
isotig01416
isotig01417	SUNJ01012803.1	100	209	0	0	291	499	213311	213519	1.62e-105	387
isotig01418	SUNJ01012803.1	100	211	0	0	291	501	213311	213521	1.26e-106	390
isotig01419	SUNJ01012803.1	100	137	0	0	155	291	213118	213254	1.59e-65	254
isotig01420	SUNJ01012803.1	100	137	0	0	155	291	213118	213254	1.6e-65	254
isotig01421
isotig01422	SUNJ01013832.1	99.306	144	1	0	346	489	6137	5994	1.02e-67	261
isotig01423	SUNJ01013832.1	99.306	144	1	0	327	470	6137	5994	9.8e-68	261
isotig01424	SUNJ01015842.1	100	184	0	0	232	415	12968	13151	1.12e-91	340
isotig01425	SUNJ01013832.1	99.66	294	1	0	232	525	6290	5997	4.42e-151	538
isotig01426	SUNJ01015842.1	100	184	0	0	213	396	12968	13151	1.07e-91	340
isotig01427	SUNJ01015842.1	98.606	287	4	0	4	290	6874	7160	2.98e-142	508
isotig01428	SUNJ01013832.1	99.66	294	1	0	213	506	6290	5997	4.25e-151	538
isotig01429	SUNJ01008388.1	99.637	1379	4	1	809	2187	111798	110421	0	2518
isotig01430	SUNJ01008388.1	99.637	1379	4	1	782	2160	111798	110421	0	2518
isotig01431	SUNJ01008388.1	99.637	1379	4	1	773	2151	111798	110421	0	2518
isotig01432	SUNJ01008388.1	99.637	1379	4	1	746	2124	111798	110421	0	2518
isotig01433	SUNJ01008388.1	99.637	1379	4	1	437	1815	111798	110421	0	2518
isotig01434	SUNJ01001452.1	99.001	1502	6	6	1	1499	255115	256610	0	2682
isotig01435	SUNJ01005230.1	99.517	207	1	0	6	212	89561	89767	6.01e-103	377
isotig01442	SUNJ01002078.1	99.841	628	1	0	1	628	418453	419080	0	1155
isotig01443	SUNJ01010250.1	99.224	1288	4	6	376	1660	5242	3958	0	2318
isotig01444	SUNJ01010250.1	99.224	1288	4	6	324	1608	5242	3958	0	2318
isotig01445	SUNJ01010250.1	99.224	1288	4	6	184	1468	5242	3958	0	2318
isotig01446	SUNJ01010250.1	99.224	1288	4	6	189	1473	5242	3958	0	2318
isotig01447	SUNJ01010250.1	99.224	1288	4	6	181	1465	5242	3958	0	2318
isotig01448	SUNJ01010250.1	99.328	893	2	4	111	1002	4847	3958	0	1613
isotig01449	SUNJ01004894.1	99.287	421	3	0	1898	2318	46256	45836	0	761
isotig01450	SUNJ01004894.1	99.287	421	3	0	1797	2217	46256	45836	0	761
isotig01451	SUNJ01004894.1	99.793	483	1	0	461	943	84660	84178	0	887
isotig01452	SUNJ01004894.1	99.793	483	1	0	360	842	84660	84178	0	887
isotig01453	SUNJ01014361.1	99.286	140	0	1	300	439	144479	144617	6.46e-65	252
isotig01454	SUNJ01014361.1	92.222	90	1	6	43	127	144082	144170	1.72e-26	122
isotig01455	SUNJ01014361.1	100	215	0	0	1	215	144527	144741	2.96e-109	398
isotig01456	SUNJ01005179.1	97.455	393	10	0	2	394	304286	303894	0	671
isotig01457	SUNJ01005179.1	97.455	393	10	0	2	394	304286	303894	0	671
isotig01458	SUNJ01005179.1	97.455	393	10	0	2	394	304286	303894	0	671
isotig01459	SUNJ01010028.1	100	156	0	0	1	156	50700	50545	4.24e-76	289
isotig01460	SUNJ01003173.1	95.167	538	26	0	2	539	4401	3864	0	850
isotig01461	SUNJ01010028.1	100	156	0	0	1	156	50700	50545	4.24e-76	289
isotig01462	SUNJ01010028.1	100	156	0	0	1	156	50700	50545	4.6e-76	289
isotig01463	SUNJ01001783.1	99.151	471	2	2	1	470	47975	47506	0	846
isotig01464	SUNJ01012717.1	97.785	316	1	4	398	707	443568	443883	1.68e-151	540
isotig01465	SUNJ01014309.1	99.051	316	3	0	1	316	124697	125012	6.77e-160	568
isotig01466	SUNJ01001783.1	99.149	470	2	2	1	469	47975	47507	0	845
isotig01467	SUNJ01012717.1	98.661	224	3	0	332	555	437612	437835	8.33e-109	398
isotig01468	SUNJ01012717.1	97.785	316	1	4	127	436	443568	443883	1.01e-151	540
isotig01469	SUNJ01009675.1	99.275	138	1	0	89	226	18733	18870	9.28e-65	250
isotig01470	SUNJ01010880.1	99.107	672	3	1	967	1638	28245	27577	0	1205
isotig01471	SUNJ01010880.1	99.107	672	3	1	967	1638	28245	27577	0	1205
isotig01472	SUNJ01010880.1	99.088	987	6	1	967	1953	28245	27262	0	1770
isotig01473	SUNJ01010880.1	99.556	225	1	0	3	227	67178	66954	1.58e-112	411
isotig01474	SUNJ01003580.1	98.592	213	3	0	1	213	590242	590454	1.48e-102	377
isotig01475	SUNJ01003580.1	98.592	213	3	0	1	213	590242	590454	1.45e-102	377
isotig01478	SUNJ01012319.1	99.655	290	1	0	382	671	91363	91652	1.5e-148	531
isotig01482	SUNJ01011000.1	99.623	1061	4	0	175	1235	99890	98830	0	1938
isotig01483	SUNJ01011340.1	98.986	690	5	2	354	1041	26014	25325	0	1234
isotig01484	SUNJ01011340.1	98.833	857	7	3	354	1207	26014	25158	0	1524
isotig01485	SUNJ01011000.1	99.529	1062	4	1	106	1167	99890	98830	0	1932
isotig01486	SUNJ01011000.1	100	112	0	0	175	286	99890	99779	9.59e-52	207
isotig01487	SUNJ01011000.1	99.628	269	1	0	152	420	99098	98830	2.75e-137	492
isotig01488	SUNJ01003294.1	99.231	390	3	0	1297	1686	68500	68889	0	704
isotig01489	SUNJ01003294.1	99.429	701	4	0	2	702	68189	68889	0	1273
isotig01490	SUNJ01003294.1	99.231	390	3	0	184	573	68500	68889	0	704
isotig01491	SUNJ01003294.1	99.231	390	3	0	149	538	68500	68889	0	704
isotig01492	SUNJ01012332.1	99.561	228	1	0	35	262	198093	197866	1.66e-114	416
isotig01494	SUNJ01001265.1	100	280	0	0	220	499	89274	88995	5.87e-145	518
isotig01496	SUNJ01001265.1	100	146	0	0	225	370	89140	88995	1.35e-70	270
isotig01497	SUNJ01002967.1	99.153	118	1	0	1	118	20496	20613	2.6e-53	213
isotig01499	SUNJ01001295.1	99.692	325	1	0	173	497	172426	172750	2.46e-168	595
isotig01500	SUNJ01001295.1	100	325	0	0	139	463	172426	172750	4.92e-170	601
isotig01501	SUNJ01001295.1	99.692	325	1	0	118	442	172426	172750	2.18e-168	595
isotig01502	SUNJ01001295.1	99.692	325	1	0	106	430	172426	172750	2.12e-168	595
isotig01503	SUNJ01001295.1	100	214	0	0	249	462	172537	172750	2.48e-108	396
isotig01504	SUNJ01003568.1	100	458	0	0	12	469	86151	86608	0	846
isotig01505	SUNJ01003568.1	100	458	0	0	12	469	86151	86608	0	846
isotig01506	SUNJ01005239.1	99.401	167	0	1	90	256	1383	1218	9.16e-80	302
isotig01507	SUNJ01002446.1	89.474	285	7	12	90	366	133313	133044	7.07e-91	339
isotig01508	SUNJ01005239.1	98.824	170	1	1	1	169	1321	1152	7.67e-80	302
isotig01509	SUNJ01001161.1	99.353	773	5	0	4	776	4165	3393	0	1400
isotig01510	SUNJ01001161.1	99.353	773	5	0	4	776	4165	3393	0	1400
isotig01511	SUNJ01001161.1	98.989	890	5	3	4	892	4165	3279	0	1591
isotig01512
isotig01513	SUNJ01002915.1	97.265	585	16	0	169	753	1164	1748	0	992
isotig01514	SUNJ01015663.1	98.81	420	5	0	173	592	314420	314839	0	749
isotig01515	SUNJ01005322.1	99.554	224	1	0	152	375	88021	88244	3.82e-112	409
isotig01516	SUNJ01003985.1	98.058	206	4	0	102	307	347837	347632	3.37e-97	359
isotig01517	SUNJ01010448.1	99.699	997	3	0	1031	2027	88702	89698	0	1825
isotig01518	SUNJ01010448.1	99.699	997	3	0	998	1994	88702	89698	0	1825
isotig01519	SUNJ01010448.1	99.699	997	3	0	997	1993	88702	89698	0	1825
isotig01520	SUNJ01010448.1	99.699	997	3	0	964	1960	88702	89698	0	1825
isotig01521	SUNJ01010448.1	99.761	1254	1	2	406	1659	82110	83361	0	2298
isotig01522	SUNJ01010448.1	99.761	1254	1	2	373	1626	82110	83361	0	2298
isotig01523	SUNJ01010448.1	99.761	1254	1	2	372	1625	82110	83361	0	2298
isotig01524	SUNJ01010448.1	99.761	1254	1	2	339	1592	82110	83361	0	2298
isotig01525	SUNJ01010448.1	99.752	404	1	0	3	406	60577	60980	0	741
isotig01526	SUNJ01010448.1	99.707	341	0	1	373	713	64620	64959	1.63e-176	623
isotig01527	SUNJ01010448.1	99.707	341	0	1	372	712	64620	64959	1.63e-176	623
isotig01528	SUNJ01010448.1	99.707	341	0	1	339	679	64620	64959	1.55e-176	623
isotig01529	SUNJ01004760.1	100	391	0	0	192	582	3729	4119	0	723
isotig01530	SUNJ01004760.1	100	391	0	0	148	538	3729	4119	0	723
isotig01531	SUNJ01004760.1	100	282	0	0	192	473	3729	4010	4.03e-146	521
isotig01532	SUNJ01004760.1	100	278	0	0	192	469	3729	4006	6.71e-144	514
isotig01533	SUNJ01004760.1	100	391	0	0	177	567	3729	4119	0	723
isotig01534	SUNJ01004760.1	100	282	0	0	148	429	3729	4010	3.63e-146	521
isotig01535	SUNJ01004760.1	100	278	0	0	148	425	3729	4006	6.05e-144	514
isotig01536	SUNJ01004760.1	100	282	0	0	177	458	3729	4010	3.89e-146	521
isotig01537	SUNJ01004760.1	100	278	0	0	177	454	3729	4006	6.49e-144	514
isotig01538	SUNJ01009689.1	89.091	220	24	0	721	940	185089	185308	2.62e-71	274
isotig01539	SUNJ01009689.1	89.091	220	24	0	721	940	185089	185308	2.62e-71	274
isotig01540	SUNJ01009689.1	98	150	3	0	575	724	184697	184846	1.98e-67	261
isotig01541	SUNJ01009689.1	96.552	174	5	1	2	175	183031	183203	3.08e-75	287
isotig01542	SUNJ01009689.1	96.571	175	5	1	2	176	183031	183204	8.58e-76	289
isotig01543	SUNJ01009689.1	96.552	174	5	1	2	175	183031	183203	3.08e-75	287
isotig01544	SUNJ01009689.1	96.571	175	5	1	2	176	183031	183204	8.58e-76	289
isotig01545	SUNJ01009689.1	96.552	174	5	1	2	175	183031	183203	2.98e-75	287
isotig01546	SUNJ01009689.1	96.571	175	5	1	2	176	183031	183204	8.3e-76	289
isotig01547	SUNJ01010569.1	99.324	148	1	0	137	284	267362	267215	6.35e-70	268
isotig01548	SUNJ01010569.1	99.324	148	1	0	137	284	267362	267215	6.27e-70	268
isotig01549	SUNJ01010569.1	98.93	187	1	1	3	189	267400	267215	1.79e-89	333
isotig01550	SUNJ01010569.1	98.93	187	1	1	3	189	267400	267215	1.79e-89	333
isotig01551	SUNJ01010569.1	98.93	187	1	1	3	189	267400	267215	1.76e-89	333
isotig01552	SUNJ01010569.1	98.93	187	1	1	3	189	267400	267215	1.76e-89	333
isotig01553	SUNJ01010569.1	99.353	309	2	0	137	445	267362	267054	7.93e-158	560
isotig01554	SUNJ01010569.1	99.138	348	2	1	3	350	267400	267054	2.14e-177	625
isotig01555	SUNJ01010569.1	99.138	348	2	1	3	350	267400	267054	2.14e-177	625
isotig01556	SUNJ01010876.1	98.136	590	9	2	861	1448	69645	69056	0	1027
isotig01557	SUNJ01010876.1	98.541	754	10	1	626	1378	69809	69056	0	1330
isotig01558	SUNJ01010876.1	98.541	754	10	1	599	1351	69809	69056	0	1330
isotig01559	SUNJ01013149.1	99.268	410	2	1	250	659	207088	207496	0	739
isotig01560	SUNJ01010876.1	96.306	758	24	4	140	895	69806	69051	0	1242
isotig01561	SUNJ01010876.1	97.301	667	14	4	204	868	69715	69051	0	1129
isotig01562	SUNJ01010876.1	96.547	753	22	4	140	890	69806	69056	0	1243
isotig01563	SUNJ01010876.1	97.583	662	12	4	204	863	69715	69056	0	1131
isotig01564	SUNJ01008160.1	99.658	292	1	0	70	361	264997	264706	5.4e-150	534
isotig01565	SUNJ01008160.1	100	166	0	0	70	235	264997	264832	1.19e-81	307
isotig01566	SUNJ01008160.1	99.778	450	1	0	70	519	264997	264548	0	826
isotig01567	SUNJ01008160.1	99.401	167	0	1	70	236	264997	264832	5.53e-80	302
isotig01568	SUNJ01008160.1	100	166	0	0	70	235	264997	264832	1.19e-81	307
isotig01569	SUNJ01008160.1	100	251	0	0	234	484	264798	264548	6.98e-129	464
isotig01570	SUNJ01008160.1	100	251	0	0	235	485	264798	264548	6.99e-129	464
isotig01571	SUNJ01008160.1	100	251	0	0	234	484	264798	264548	6.98e-129	464
isotig01576	SUNJ01014013.1	99.449	363	1	1	14	376	223890	224251	0	658
isotig01577	SUNJ01014013.1	99.446	361	1	1	14	373	223890	224250	0	654
isotig01578	SUNJ01014013.1	99.602	251	0	1	60	310	224002	224251	7.5e-127	457
isotig01579	SUNJ01014013.1	99.598	249	0	1	60	307	224002	224250	9.24e-126	453
isotig01580	SUNJ01011967.1	98.748	559	6	1	2	560	20239	20796	0	992
isotig01581	SUNJ01011967.1	98.748	559	6	1	2	560	20239	20796	0	992
isotig01582	SUNJ01006155.1	87.234	94	12	0	441	534	123122	123029	1.51e-21	108
isotig01583	SUNJ01006155.1	87.234	94	12	0	435	528	123122	123029	1.49e-21	108
isotig01584	SUNJ01006155.1	87.234	94	12	0	319	412	123122	123029	1.15e-21	108
isotig01585	SUNJ01006155.1	87.234	94	12	0	313	406	123122	123029	1.13e-21	108
isotig01586	SUNJ01006155.1	87.368	95	12	0	133	227	123123	123029	1.68e-22	110
isotig01587	SUNJ01007669.1	99.588	243	1	0	3	245	6255	6497	1.11e-122	444
isotig01589	SUNJ01007669.1	100	193	0	0	194	386	6529	6721	1.35e-96	357
isotig01590	SUNJ01007669.1	99.358	467	2	1	2	467	6255	6721	0	845
isotig01593	SUNJ01001275.1	98.251	343	2	4	12	353	96552	96213	9.01e-169	597
isotig01594	SUNJ01009983.1	99.399	333	1	1	1	333	254475	254144	2.42e-170	603
isotig01595	SUNJ01009983.1	99.399	333	1	1	1	333	254475	254144	2.31e-170	603
isotig01596	SUNJ01009983.1	99.399	333	1	1	1	333	254475	254144	2.31e-170	603
isotig01597	SUNJ01010029.1	100	203	0	0	1	203	27916	28118	3.36e-102	375
isotig01598	SUNJ01010029.1	100	203	0	0	1	203	27916	28118	3.1e-102	375
isotig01599	SUNJ01010029.1	100	203	0	0	1	203	27916	28118	3.09e-102	375
isotig01600	SUNJ01012707.1	99.301	286	2	0	1	286	18813	18528	7.2e-145	518
isotig01601	SUNJ01012707.1	99.301	286	2	0	1	286	18813	18528	7.16e-145	518
isotig01602	SUNJ01012707.1	99.301	286	2	0	1	286	18813	18528	7.11e-145	518
isotig01603	SUNJ01012707.1	99.659	293	1	0	1	293	18598	18306	1.45e-150	536
isotig01604	SUNJ01012707.1	99.659	293	1	0	1	293	18598	18306	1.44e-150	536
isotig01605	SUNJ01012707.1	99.659	293	1	0	1	293	18598	18306	1.43e-150	536
isotig01606	SUNJ01012707.1	97.895	95	1	1	23	117	11853	11760	1.1e-38	163
isotig01607	SUNJ01008191.1	91.688	385	29	3	3	385	228794	228411	8e-149	531
isotig01608	SUNJ01008191.1	91.688	385	29	3	3	385	228794	228411	7.96e-149	531
isotig01609	SUNJ01004871.1	95.58	181	6	1	244	424	196624	196446	3.92e-76	289
isotig01610	SUNJ01004871.1	95.531	179	7	1	244	421	196624	196446	5.04e-75	285
isotig01611	SUNJ01004871.1	95.58	181	6	1	228	408	196624	196446	3.77e-76	289
isotig01612	SUNJ01004871.1	95.531	179	7	1	228	405	196624	196446	4.83e-75	285
isotig01613	SUNJ01006093.1	90.37	135	12	1	1	135	47195	47062	8.75e-43	176
isotig01614	SUNJ01002048.1	99.608	255	1	0	5	259	928	674	1.75e-129	466
isotig01615	SUNJ01002048.1	99.603	252	1	0	5	256	925	674	8.07e-128	460
isotig01616	SUNJ01002048.1	99.575	471	1	1	5	475	928	459	0	857
isotig01617	SUNJ01002048.1	99.573	468	1	1	5	472	925	459	0	852
isotig01618	SUNJ01002048.1	99.608	255	1	0	5	259	928	674	1.76e-129	466
isotig01619	SUNJ01002048.1	99.603	252	1	0	5	256	925	674	8.11e-128	460
isotig01620	SUNJ01002845.1	95.949	395	2	9	17	398	23601	23994	1.52e-177	628
isotig01621	SUNJ01002845.1	95.949	395	2	9	17	398	23601	23994	1.5e-177	628
isotig01623	SUNJ01002845.1	100	270	0	0	681	950	40738	41007	6.87e-139	499
isotig01626	SUNJ01001345.1	99.8	1000	2	0	1029	2028	16675	15676	0	1836
isotig01628	SUNJ01001345.1	99.8	1000	2	0	1029	2028	16675	15676	0	1836
isotig01629	SUNJ01001345.1	99.532	641	2	1	39	679	70899	70260	0	1166
isotig01632	SUNJ01014612.1	99.664	298	1	0	162	459	159558	159855	1.07e-152	545
isotig01633	SUNJ01014612.1	99.664	298	1	0	162	459	159558	159855	1.06e-152	545
isotig01634	SUNJ01001668.1	100	252	0	0	1441	1692	29126	28875	8.09e-129	466
isotig01635	SUNJ01001668.1	100	252	0	0	1441	1692	29126	28875	8.06e-129	466
isotig01636	SUNJ01006333.1	89.428	1504	120	20	23	1493	890805	889308	0	1860
isotig01637	SUNJ01006333.1	92.417	422	31	1	262	683	889728	889308	7.34e-170	601
isotig01638	SUNJ01009192.1	99.777	896	2	0	825	1720	14872	13977	0	1644
isotig01639	SUNJ01009192.1	99.777	895	2	0	825	1719	14872	13978	0	1642
isotig01640	SUNJ01009192.1	99.698	994	3	0	825	1818	14872	13879	0	1820
isotig01641	SUNJ01008677.1	99.815	1082	2	0	13	1094	23348	22267	0	1988
isotig01642	SUNJ01009080.1	99.6	250	0	1	10	259	35530	35778	5.49e-126	455
isotig01643	SUNJ01012566.1	89.516	248	25	1	10	256	16314	16561	2.09e-83	313
isotig01644	SUNJ01004928.1	100	1014	0	0	4	1017	9757	8744	0	1873
isotig01645	SUNJ01004928.1	99.687	638	2	0	1487	2124	6509	5872	0	1168
isotig01646	SUNJ01004928.1	99.687	638	2	0	913	1550	6509	5872	0	1168
isotig01647	SUNJ01004928.1	100	197	0	0	321	517	11518	11322	1.03e-98	364
isotig01648	SUNJ01008021.1	97.633	169	4	0	1	169	50977	50809	6.59e-77	291
isotig01649	SUNJ01009277.1	99.669	2116	5	2	1	2115	8715	10829	0	3868
isotig01650	SUNJ01009277.1	99.669	2116	5	2	1	2115	8715	10829	0	3868
isotig01651	SUNJ01009157.1	99.38	484	2	1	341	823	736	1219	0	876
isotig01653	SUNJ01009277.1	100	202	0	0	157	358	41068	41269	8.81e-102	374
isotig01654	SUNJ01001792.1	95.082	305	13	1	739	1041	84599	84903	5.53e-133	479
isotig01655	SUNJ01001792.1	95.082	305	13	1	739	1041	84599	84903	5.53e-133	479
isotig01656	SUNJ01001792.1	95.41	305	12	1	739	1041	84599	84903	1.19e-134	484
isotig01657	SUNJ01001792.1	95.082	305	13	1	637	939	84599	84903	4.97e-133	479
isotig01658	SUNJ01001792.1	95.082	305	13	1	637	939	84599	84903	4.97e-133	479
isotig01659	SUNJ01001792.1	95.41	305	12	1	637	939	84599	84903	1.07e-134	484
isotig01660	SUNJ01013160.1	96.683	1447	31	13	1	1446	257256	255826	0	2390
isotig01662	SUNJ01013160.1	99.28	1111	8	0	1	1111	258154	259264	0	2008
isotig01664	SUNJ01013160.1	97.697	304	2	4	479	781	258453	258154	8.71e-145	518
isotig01665
isotig01666	SUNJ01016039.1	99.789	474	1	0	1	474	38784	39257	0	870
isotig01667	SUNJ01016039.1	99.789	474	1	0	1	474	38784	39257	0	870
isotig01668	SUNJ01016039.1	99.789	473	1	0	1	473	38784	39256	0	869
isotig01669	SUNJ01014727.1	100	659	0	0	1	659	56622	57280	0	1218
isotig01670	SUNJ01005736.1	87.296	307	22	1	149	455	48082	48371	5.68e-90	335
isotig01671	SUNJ01009504.1	99.408	169	0	1	213	380	808	640	3.45e-81	305
isotig01672	SUNJ01000576.1	98.462	325	5	0	123	447	41127	41451	2.94e-161	573
isotig01673	SUNJ01000576.1	98.462	325	5	0	123	447	41127	41451	2.3e-161	573
isotig01674	SUNJ01000576.1	98.462	325	5	0	123	447	41127	41451	1.62e-161	573
isotig01675	SUNJ01000576.1	98.503	334	5	0	123	456	41127	41460	1.07e-166	590
isotig01676	SUNJ01000576.1	98.494	332	5	0	123	454	41127	41458	1.38e-165	586
isotig01677	SUNJ01000576.1	98.48	329	5	0	123	451	41127	41455	6.22e-164	580
isotig01678	SUNJ01003691.1	95.928	614	23	1	1	614	194349	194960	0	994
isotig01679	SUNJ01014149.1	97.229	397	11	0	179	575	7148	7544	0	673
isotig01680	SUNJ01003691.1	95.711	443	17	1	1	443	194349	194789	0	712
isotig01681	SUNJ01002014.1	96.25	400	11	4	179	576	2856	2459	0	652
isotig01682	SUNJ01014149.1	97.345	226	6	0	179	404	7148	7373	6.2e-105	385
isotig01683	SUNJ01014149.1	94.944	356	16	2	3	358	7191	7544	8.15e-157	556
isotig01684	SUNJ01004534.1	98.31	355	5	1	101	455	2742	3095	8.51e-176	621
isotig01685	SUNJ01004534.1	98.31	355	5	1	101	455	2742	3095	8.53e-176	621
isotig01686	SUNJ01004534.1	98.485	132	1	1	118	249	6327	6457	7.5e-59	231
isotig01687	SUNJ01004534.1	98.485	132	1	1	118	249	6327	6457	7.53e-59	231
isotig01690	SUNJ01002177.1	99.558	226	1	0	1118	1343	59649	59424	9.4e-113	412
isotig01691	SUNJ01002177.1	98.615	361	5	0	1	361	69346	68986	0	640
isotig01692	SUNJ01002177.1	99.558	226	1	0	306	531	59649	59424	4.84e-113	412
isotig01693	SUNJ01006354.1	99.179	1218	9	1	1355	2572	100893	99677	0	2193
isotig01694	SUNJ01006354.1	99.179	1218	9	1	473	1690	100893	99677	0	2193
isotig01695	SUNJ01006354.1	99.206	504	4	0	2	505	152852	152349	0	909
isotig01696	SUNJ01007152.1	99.324	296	1	1	357	652	345619	345913	7.16e-150	534
isotig01697	SUNJ01007152.1	100	289	0	0	185	473	345625	345913	5.12e-150	534
isotig01698	SUNJ01010221.1	99.404	2013	10	1	1	2011	143997	141985	0	3650
isotig01699	SUNJ01010221.1	99.712	695	2	0	1281	1975	142679	141985	0	1273
isotig01700	SUNJ01013851.1	99.569	232	0	1	293	524	49941	50171	1.11e-115	422
isotig01701	SUNJ01013851.1	98.19	442	2	1	737	1172	56905	57346	0	767
isotig01702	SUNJ01010221.1	99.541	218	1	0	1	218	143997	143780	5.26e-109	398
isotig01703	SUNJ01008086.1	95.308	1769	65	10	6	1773	61444	59693	0	2791
isotig01704	SUNJ01008086.1	95.444	1778	63	10	1	1778	61452	59693	0	2819
isotig01705	SUNJ01005373.1	99.133	346	3	0	159	504	16185	16530	1.61e-176	623
isotig01706	SUNJ01013314.1	99.515	206	1	0	454	659	18201	18406	4.65e-102	375
isotig01707	SUNJ01015036.1	97.166	247	5	2	372	616	289500	289746	2.56e-114	416
isotig01708	SUNJ01012471.1	99.397	663	4	0	6	668	282506	281844	0	1203
isotig01709	SUNJ01012471.1	97.483	596	14	1	1356	1951	227842	227248	0	1016
isotig01710	SUNJ01012471.1	98.919	555	6	0	3	557	278290	277736	0	992
isotig01711	SUNJ01012471.1	98.726	471	6	0	3	473	278290	277820	0	837
isotig01712	SUNJ01012471.1	97.993	299	4	2	112	409	227545	227248	4.41e-145	518
isotig01713	SUNJ01006919.1	99.539	868	4	0	615	1482	32885	33752	0	1581
isotig01714	SUNJ01006919.1	99.302	430	3	0	615	1044	32885	33314	0	778
isotig01715	SUNJ01008725.1	99.84	626	1	0	1	626	65745	65120	0	1151
isotig01716	SUNJ01014233.1	99.5	400	2	0	263	662	153591	153192	0	728
isotig01717	SUNJ01003061.1	98.73	315	3	1	2	315	101323	101009	1.96e-157	558
isotig01718	SUNJ01001835.1	99.076	433	4	0	1	433	283205	283637	0	778
isotig01719	SUNJ01001835.1	99.076	433	4	0	1	433	283205	283637	0	778
isotig01720	SUNJ01013433.1	100	150	0	0	734	883	31515	31366	1.98e-72	278
isotig01721	SUNJ01005544.1	98.992	397	3	1	1	397	291854	292249	0	710
isotig01722	SUNJ01005544.1	98.759	403	4	1	1	403	291854	292255	0	715
isotig01723	SUNJ01003110.1	100	595	0	0	563	1157	52405	51811	0	1099
isotig01724	SUNJ01010277.1	99.368	475	3	0	380	854	164396	163922	0	861
isotig01725	SUNJ01002198.1	96.22	873	27	5	1	871	147293	146425	0	1424
isotig01726	SUNJ01012554.1	96.304	460	14	3	448	906	102510	102967	0	752
isotig01727	SUNJ01010277.1	99.291	282	2	0	1	282	182657	182376	1.04e-142	510
isotig01728	SUNJ01008688.1	99.255	537	4	0	2	538	59520	58984	0	970
isotig01729	SUNJ01008688.1	98.726	314	3	1	705	1018	42149	41837	2.82e-156	556
isotig01730	SUNJ01008688.1	98.726	314	3	1	532	845	42149	41837	2.39e-156	556
isotig01731	SUNJ01008688.1	99.221	642	4	1	1	642	42477	41837	0	1157
isotig01732	SUNJ01001372.1	98.41	503	8	0	6	508	45401	45903	0	885
isotig01733	SUNJ01000389.1	98.059	979	14	5	5	982	61392	60418	0	1698
isotig01734	SUNJ01001099.1	98.364	550	9	0	394	943	243683	243134	0	966
isotig01735	SUNJ01001099.1	98.364	550	9	0	371	920	243683	243134	0	966
isotig01736	SUNJ01001099.1	96.71	699	23	0	6	704	243832	243134	0	1164
isotig01737	SUNJ01002494.1	92.602	392	25	4	5	395	290675	291063	1.03e-157	560
isotig01738	SUNJ01008086.1	99.107	448	1	1	372	819	119896	119452	0	802
isotig01739	SUNJ01008086.1	99.095	442	1	1	164	605	119890	119452	0	791
isotig01741	SUNJ01012899.1	100	180	0	0	454	633	262974	262795	2.72e-89	333
isotig01742	SUNJ01009947.1	96.186	472	13	5	7	476	136400	136868	0	767
isotig01743	SUNJ01009662.1	98.681	379	2	1	784	1159	213291	213669	0	669
isotig01744	SUNJ01013634.1	99.369	317	2	0	406	722	181231	181547	4.71e-162	575
isotig01745	SUNJ01013634.1	99.062	320	2	1	279	597	181228	181547	1.39e-161	573
isotig01746	SUNJ01009662.1	98.462	195	3	0	1	195	159941	159747	8.82e-93	344
isotig01747	SUNJ01013634.1	99.197	249	2	0	111	359	181299	181547	1.43e-124	449
isotig01748	SUNJ01006951.1	99.493	592	2	1	249	840	154032	153442	0	1075
isotig01749	SUNJ01006951.1	99.048	315	2	1	249	563	154032	153719	1.27e-158	564
isotig01750	SUNJ01006951.1	99.381	323	1	1	249	571	154032	153711	8.81e-165	584
isotig01751	SUNJ01006951.1	99.491	393	2	0	16	408	154304	153912	0	715
isotig01752	SUNJ01009913.1	99.632	272	1	0	426	697	35855	36126	1.01e-138	497
isotig01753	SUNJ01009913.1	99.333	450	3	0	145	594	7420	7869	0	815
isotig01754	SUNJ01009913.1	99.569	232	1	0	145	376	7420	7651	1.38e-116	424
isotig01755	SUNJ01009913.1	99.632	272	1	0	239	510	35855	36126	7.27e-139	497
isotig01756	SUNJ01009913.1	99.31	145	1	0	254	398	7570	7714	2.89e-68	263
isotig01757	SUNJ01013630.1	95.484	620	2	1	310	903	163648	164267	0	966
isotig01758	SUNJ01013630.1	99.412	510	2	1	310	818	163648	164157	0	924
isotig01759	SUNJ01015661.1	98.985	197	2	0	192	388	90543	90347	1.24e-95	353
isotig01760	SUNJ01001180.1	100	131	0	0	65	195	44784	44914	2.22e-62	243
isotig01761	SUNJ01003577.1	97.297	185	5	0	1	185	21633	21449	2.59e-84	315
isotig01762	SUNJ01008826.1	99.076	433	3	1	1	432	262143	261711	0	776
isotig01763	SUNJ01008826.1	99.074	432	3	1	1	431	262143	261712	0	774
isotig01764	SUNJ01008826.1	98.218	449	8	0	1	449	257981	257533	0	785
isotig01765	SUNJ01008826.1	98.063	413	7	1	1	413	241116	240705	0	717
isotig01768	SUNJ01014387.1	98.769	1300	12	4	1	1299	46666	47962	0	2309
isotig01772	SUNJ01000035.1	98.512	941	12	2	258	1198	140477	141415	0	1659
isotig01773	SUNJ01000035.1	98.618	941	11	2	258	1198	140477	141415	0	1664
isotig01774	SUNJ01000035.1	98.618	941	11	2	258	1198	140477	141415	0	1664
isotig01775	SUNJ01000035.1	98.723	940	11	1	258	1197	140477	141415	0	1668
isotig01776	SUNJ01000035.1	99.336	753	5	0	258	1010	140477	141229	0	1363
isotig01777	SUNJ01000035.1	99.336	753	5	0	258	1010	140477	141229	0	1363
isotig01778	SUNJ01000289.1	99.335	902	6	0	1271	2172	309682	308781	0	1633
isotig01779	SUNJ01000289.1	99.335	902	6	0	1230	2131	309682	308781	0	1633
isotig01780	SUNJ01002743.1	99.504	1209	6	0	696	1904	9773	8565	0	2200
isotig01781	SUNJ01002743.1	99.504	1209	6	0	655	1863	9773	8565	0	2200
isotig01782	SUNJ01000289.1	99.356	1087	7	0	47	1133	309867	308781	0	1969
isotig01783	SUNJ01002743.1	99.627	268	1	0	295	562	12788	12521	1.61e-136	490
isotig01784	SUNJ01002743.1	99.627	268	1	0	254	521	12788	12521	1.5e-136	490
isotig01785	SUNJ01006674.1	97.756	713	16	0	498	1210	165082	164370	0	1229
isotig01786	SUNJ01006674.1	97.756	713	16	0	462	1174	165082	164370	0	1229
isotig01787	SUNJ01006674.1	97.75	711	16	0	417	1127	165080	164370	0	1225
isotig01788	SUNJ01006674.1	97.75	711	16	0	381	1091	165080	164370	0	1225
isotig01789	SUNJ01006674.1	95.035	282	11	2	1	281	202114	201835	1.37e-121	440
isotig01790	SUNJ01006674.1	95.035	282	11	2	1	281	202114	201835	1.28e-121	440
isotig01791	SUNJ01006674.1	96.438	365	13	0	1	365	202114	201750	1.05e-170	603
isotig01792	SUNJ01008546.1	97.974	691	11	2	469	1156	104	794	0	1195
isotig01793	SUNJ01014698.1	97.921	433	9	0	280	712	109261	109693	0	750
isotig01794	SUNJ01014698.1	97.921	433	9	0	219	651	109261	109693	0	750
isotig01795	SUNJ01014698.1	97.921	433	9	0	217	649	109261	109693	0	750
isotig01796	SUNJ01014698.1	97.647	255	6	0	419	673	109439	109693	6.03e-121	438
isotig01797	SUNJ01014698.1	97.647	255	6	0	358	612	109439	109693	5.47e-121	438
isotig01798	SUNJ01014698.1	97.647	255	6	0	356	610	109439	109693	5.45e-121	438
isotig01799	SUNJ01002155.1	98.644	590	4	2	218	803	389222	388633	0	1042
isotig01800	SUNJ01002155.1	98.644	590	4	2	143	728	389222	388633	0	1042
isotig01801	SUNJ01002155.1	98.254	401	3	2	351	747	389033	388633	0	699
isotig01802	SUNJ01002155.1	98.642	589	4	2	89	673	389221	388633	0	1040
isotig01803	SUNJ01002155.1	98.254	401	3	2	276	672	389033	388633	0	699
isotig01804	SUNJ01002155.1	98.254	401	3	2	221	617	389033	388633	0	699
isotig01805	SUNJ01002155.1	98.442	385	6	0	169	553	363337	362953	0	678
isotig01806	SUNJ01012325.1	98.283	233	4	0	375	607	63689	63921	5.34e-112	409
isotig01807	SUNJ01012325.1	98.741	397	5	0	375	771	63689	64085	0	706
isotig01808	SUNJ01012325.1	98.283	233	4	0	206	438	63689	63921	4.12e-112	409
isotig01809	SUNJ01012325.1	98.741	397	5	0	206	602	63689	64085	0	706
isotig01810	SUNJ01012325.1	98.754	321	4	0	103	423	63601	63921	4.83e-161	571
isotig01811	SUNJ01012325.1	98.969	485	5	0	103	587	63601	64085	0	869
isotig01812	SUNJ01013394.1	94.964	139	7	0	1	139	70123	69985	6e-55	219
isotig01813	SUNJ01008874.1	96.654	1554	46	4	1315	2862	123175	124728	0	2577
isotig01814	SUNJ01008874.1	96.654	1554	46	4	1315	2862	123175	124728	0	2577
isotig01815	SUNJ01008874.1	96.654	1554	46	4	1315	2862	123175	124728	0	2577
isotig01816	SUNJ01008874.1	96.669	1651	49	4	7	1651	123078	124728	0	2739
isotig01817	SUNJ01008874.1	96.669	1651	49	4	7	1651	123078	124728	0	2739
isotig01818	SUNJ01008874.1	96.669	1651	49	4	7	1651	123078	124728	0	2739
isotig01819	SUNJ01010407.1	99.191	1483	11	1	139	1621	9469	7988	0	2671
isotig01820	SUNJ01010407.1	99.191	1483	11	1	139	1621	9469	7988	0	2671
isotig01821	SUNJ01008047.1	99.653	577	2	0	633	1209	233212	233788	0	1055
isotig01822	SUNJ01008047.1	99.653	577	2	0	633	1209	233212	233788	0	1055
isotig01823	SUNJ01008047.1	98.529	544	3	1	1	544	247252	247790	0	955
isotig01824	SUNJ01008047.1	100	183	0	0	25	207	230071	230253	3.93e-91	339
isotig01825	SUNJ01003799.1	99.857	698	1	0	1	698	26071	26768	0	1284
isotig01826	SUNJ01003799.1	99.857	698	1	0	1	698	26071	26768	0	1284
isotig01827	SUNJ01009175.1	99.467	563	1	2	1367	1928	19245	18684	0	1024
isotig01828	SUNJ01009175.1	98.895	724	6	2	2	725	20461	19740	0	1291
isotig01829	SUNJ01003799.1	99.129	689	5	1	359	1047	42064	42751	0	1238
isotig01830	SUNJ01003799.1	100	306	0	0	1	306	26071	26376	1.61e-159	566
isotig01833	SUNJ01013702.1	99.548	884	4	0	532	1415	92677	91794	0	1611
isotig01834	SUNJ01013702.1	99.453	731	4	0	650	1380	92524	91794	0	1328
isotig01835	SUNJ01013702.1	99.548	884	4	0	498	1381	92677	91794	0	1611
isotig01836	SUNJ01013702.1	99.453	731	4	0	616	1346	92524	91794	0	1328
isotig01837	SUNJ01002376.1	98.351	485	6	2	162	645	119720	120203	0	850
isotig01838	SUNJ01002376.1	98.351	485	6	2	162	645	119720	120203	0	850
isotig01839	SUNJ01014535.1	98.802	501	5	1	1539	2039	143995	144494	0	891
isotig01843	SUNJ01000815.1	95.893	1266	49	3	9	1272	42957	41693	0	2047
isotig01844	SUNJ01013157.1	96.533	750	22	4	1233	1982	155263	156008	0	1238
isotig01845	SUNJ01000815.1	95.893	1266	49	3	9	1272	42957	41693	0	2047
isotig01846	SUNJ01000815.1	96.186	708	25	2	522	1228	42399	41693	0	1157
isotig01847	SUNJ01013157.1	96.533	750	22	4	279	1028	155263	156008	0	1238
isotig01848	SUNJ01008813.1	87.748	302	8	4	1	274	84172	83872	3.2e-87	326
isotig01849	SUNJ01003816.1	99.317	293	2	0	989	1281	13946	14238	1.86e-148	531
isotig01850	SUNJ01003816.1	99.317	293	2	0	990	1282	13946	14238	1.86e-148	531
isotig01851	SUNJ01003816.1	99.317	293	2	0	990	1282	13946	14238	1.86e-148	531
isotig01852	SUNJ01003816.1	99.317	293	2	0	766	1058	13946	14238	1.53e-148	531
isotig01853	SUNJ01003816.1	99.317	293	2	0	767	1059	13946	14238	1.53e-148	531
isotig01854	SUNJ01003816.1	99.317	293	2	0	767	1059	13946	14238	1.53e-148	531
isotig01855	SUNJ01000948.1	97.992	1195	20	3	100	1291	41078	39885	0	2071
isotig01856	SUNJ01000948.1	98.326	657	9	2	602	1257	40540	39885	0	1151
isotig01857	SUNJ01000948.1	98.025	1215	21	3	1	1214	41097	39885	0	2108
isotig01858	SUNJ01000948.1	98.326	657	9	2	525	1180	40540	39885	0	1151
isotig01859	SUNJ01000948.1	98.314	771	11	2	117	886	40654	39885	0	1351
isotig01860	SUNJ01000948.1	98.326	657	9	2	197	852	40540	39885	0	1151
isotig01861	SUNJ01010743.1	98.876	267	3	0	890	1156	15437	15703	2.24e-132	477
isotig01862	SUNJ01010743.1	100	123	0	0	993	1115	15581	15703	2.4e-57	228
isotig01863	SUNJ01010743.1	98.54	274	4	0	842	1115	15430	15703	1.29e-134	484
isotig01864	SUNJ01010743.1	100	123	0	0	952	1074	15581	15703	2.31e-57	228
isotig01865	SUNJ01010743.1	98.824	255	3	0	115	369	15449	15703	3.26e-126	455
isotig01866	SUNJ01010743.1	100	123	0	0	206	328	15581	15703	6.84e-58	228
isotig01867	SUNJ01011052.1	92.81	306	3	1	2	307	18838	18552	7.57e-117	425
isotig01868	SUNJ01011052.1	92.834	307	3	1	2	308	18838	18551	2.08e-117	427
isotig01869	SUNJ01011052.1	92.81	306	3	1	2	307	18838	18552	7.14e-117	425
isotig01870	SUNJ01011052.1	92.81	306	3	1	2	307	18838	18552	4.64e-117	425
isotig01871	SUNJ01011052.1	92.834	307	3	1	2	308	18838	18551	1.27e-117	427
isotig01872	SUNJ01011052.1	92.81	306	3	1	2	307	18838	18552	4.22e-117	425
isotig01873	SUNJ01005658.1	95.899	634	15	8	2	628	87816	87187	0	1016
isotig01874	SUNJ01015307.1	98.182	385	6	1	95	479	22113	21730	0	671
isotig01875	SUNJ01005658.1	96.069	636	15	7	2	630	87816	87184	0	1027
isotig01876	SUNJ01005658.1	95.912	636	16	7	2	630	87816	87184	0	1022
isotig01877	SUNJ01012974.1	98.708	387	3	2	93	478	26967	27352	0	686
isotig01878	SUNJ01008764.1	98.429	382	6	0	100	481	77377	76996	0	673
isotig01879	SUNJ01013365.1	96.849	603	19	0	277	879	231438	230836	0	1009
isotig01880	SUNJ01013365.1	96.849	603	19	0	110	712	231438	230836	0	1009
isotig01881	SUNJ01013365.1	100	256	0	0	1	256	276000	275745	1.71e-131	473
isotig01882	SUNJ01006100.1	98.868	265	2	1	436	700	40806	40543	6.13e-131	472
isotig01883	SUNJ01013365.1	100	256	0	0	1	256	276000	275745	1.56e-131	473
isotig01884	SUNJ01013365.1	100	252	0	0	1	252	276000	275749	2.62e-129	466
isotig01885	SUNJ01006024.1	97.627	295	7	0	388	682	104762	105056	1.64e-141	507
isotig01886	SUNJ01006024.1	97.627	295	7	0	388	682	104762	105056	1.64e-141	507
isotig01887	SUNJ01006024.1	97.627	295	7	0	388	682	104762	105056	1.64e-141	507
isotig01888	SUNJ01004506.1	97.087	206	5	1	112	316	158	363	2.09e-93	346
isotig01889	SUNJ01004506.1	96.602	206	6	1	112	316	158	363	9.71e-92	340
isotig01890	SUNJ01004506.1	96.602	206	6	1	112	316	158	363	9.71e-92	340
isotig01891	SUNJ01003513.1	100	271	0	0	3	273	355366	355096	5.6e-140	501
isotig01892	SUNJ01003513.1	100	172	0	0	294	465	354967	354796	5.53e-85	318
isotig01893	SUNJ01003513.1	100	271	0	0	3	273	355366	355096	5.94e-140	501
isotig01894	SUNJ01003513.1	100	264	0	0	233	496	355060	354797	4.25e-136	488
isotig01895	SUNJ01003513.1	100	271	0	0	3	273	355366	355096	5.94e-140	501
isotig01896	SUNJ01003513.1	100	264	0	0	233	496	355060	354797	4.25e-136	488
isotig01897	SUNJ01000391.1	97.207	3151	42	27	632	3758	241540	244668	0	5289
isotig01898	SUNJ01000391.1	96.861	3154	41	30	632	3752	241540	244668	0	5223
isotig01899	SUNJ01000391.1	97.207	3151	42	27	336	3462	241540	244668	0	5289
isotig01900	SUNJ01000391.1	96.861	3154	41	30	336	3456	241540	244668	0	5223
isotig01901	SUNJ01000391.1	99.355	620	3	1	228	846	244049	244668	0	1122
isotig01902	SUNJ01012907.1	97.755	579	12	1	1374	1951	41521	40943	0	996
isotig01904	SUNJ01003117.1	99.597	248	1	0	1417	1664	2757	3004	5.41e-125	453
isotig01905	SUNJ01010109.1	99.222	514	3	1	1	514	42596	42084	0	926
isotig01906	SUNJ01010109.1	99.201	876	7	0	1	876	42596	41721	0	1580
isotig01907	SUNJ01013278.1	99.422	519	2	1	9	527	20974	20457	0	941
isotig01908	SUNJ01008805.1	99.246	1194	8	1	400	1593	632548	633740	0	2154
isotig01909	SUNJ01013278.1	99.229	519	3	1	978	1496	20457	20974	0	935
isotig01910	SUNJ01008805.1	99.245	1192	8	1	122	1313	632550	633740	0	2150
isotig01911	SUNJ01008805.1	95.588	476	17	2	3	478	596668	597139	0	760
isotig01913	SUNJ01013553.1	99.637	826	3	0	460	1285	168991	168166	0	1509
isotig01914	SUNJ01013553.1	99.637	826	3	0	322	1147	168991	168166	0	1509
isotig01915	SUNJ01013553.1	99.637	826	3	0	293	1118	168991	168166	0	1509
isotig01917	SUNJ01000867.1	96.181	419	11	2	3	416	50226	50644	0	680
isotig01918	SUNJ01000867.1	96.181	419	11	2	3	416	50226	50644	0	680
isotig01919	SUNJ01000867.1	96.181	419	11	2	3	416	50226	50644	0	680
isotig01920	SUNJ01000867.1	96.181	419	11	2	3	416	50226	50644	0	680
isotig01921	SUNJ01008944.1	100	222	0	0	1	222	7337	7558	8.89e-113	411
isotig01922	SUNJ01006676.1	98.149	1567	12	17	1	1558	50071	51629	0	2717
isotig01923	SUNJ01004474.1	99.301	572	4	0	1	572	58920	58349	0	1035
isotig01924	SUNJ01006676.1	99.683	631	2	0	1	631	50071	50701	0	1155
isotig01925	SUNJ01008770.1	99.043	209	1	1	49	256	176506	176714	1.36e-101	374
isotig01926	SUNJ01012422.1	100	170	0	0	2	171	162147	162316	6.03e-84	315
isotig01927	SUNJ01003134.1	99.629	808	3	0	1	808	456528	455721	0	1476
isotig01928	SUNJ01003134.1	99.629	809	3	0	1	809	456528	455720	0	1478
isotig01929	SUNJ01015842.1	98.976	586	6	0	1	586	60598	61183	0	1050
isotig01930	SUNJ01001862.1	97.425	233	5	1	135	366	4558	4326	2.18e-108	396
isotig01931	SUNJ01001862.1	98.585	212	3	0	131	342	7802	7591	2.71e-102	375
isotig01932	SUNJ01008658.1	99.518	830	4	0	1	830	26223	27052	0	1511
isotig01933	SUNJ01008658.1	99.407	675	4	0	1	675	10599	11273	0	1225
isotig01934	SUNJ01008658.1	99.408	676	4	0	1	676	10599	11274	0	1227
isotig01935	SUNJ01008658.1	99.361	313	2	0	210	522	26740	27052	7.18e-160	568
isotig01936	SUNJ01008658.1	98.802	167	2	0	156	322	37225	37391	7.13e-79	298
isotig01937	SUNJ01008432.1	98.621	290	1	1	312	598	334615	334326	1.47e-142	510
isotig01938	SUNJ01008432.1	98.621	290	1	1	289	575	334615	334326	1.42e-142	510
isotig01939	SUNJ01008432.1	100	272	0	0	3	274	335001	334730	2.32e-140	503
isotig01940	SUNJ01008432.1	98.148	216	1	1	289	501	334615	334400	1.84e-101	374
isotig01941	SUNJ01008432.1	99.363	157	1	0	83	239	334888	334732	2.71e-75	285
isotig01942	SUNJ01009350.1	95.679	324	12	2	337	660	298666	298987	2.03e-145	520
isotig01943	SUNJ01012511.1	99.573	234	1	0	3	236	61962	61729	1.1e-117	427
isotig01944	SUNJ01012511.1	99.573	234	1	0	3	236	61962	61729	9.17e-118	427
isotig01945	SUNJ01012511.1	99.692	325	1	0	3	327	61962	61638	1.85e-168	595
isotig01946	SUNJ01009350.1	97.079	445	13	0	3	447	298543	298987	0	750
isotig01947	SUNJ01008990.1	96.301	811	29	1	2	812	57555	58364	0	1330
isotig01948	SUNJ01008990.1	97.024	672	19	1	122	793	57694	58364	0	1129
isotig01949	SUNJ01006353.1	94.133	375	21	1	1	375	9147	9520	1.25e-160	569
isotig01950	SUNJ01008808.1	94.468	235	13	0	122	356	76392	76626	2.18e-98	363
isotig01951	SUNJ01003134.1	100	1157	0	0	1139	2295	554284	555440	0	2137
isotig01952	SUNJ01003134.1	100	1157	0	0	1139	2295	554284	555440	0	2137
isotig01953	SUNJ01004478.1	99.421	1555	8	1	4	1557	132368	133922	0	2820
isotig01954	SUNJ01004478.1	99.422	1556	8	1	4	1558	132368	133923	0	2822
isotig01955	SUNJ01014361.1	99.772	878	1	1	247	1124	17901	18777	0	1609
isotig01956	SUNJ01014361.1	99.772	878	1	1	247	1124	17901	18777	0	1609
isotig01957	SUNJ01014361.1	99.772	878	1	1	247	1124	17901	18777	0	1609
isotig01961	SUNJ01013663.1	99.701	334	1	0	77	410	82924	82591	8.01e-173	612
isotig01962	SUNJ01013663.1	99.701	334	1	0	77	410	82924	82591	8.47e-173	612
isotig01963	SUNJ01013663.1	94.27	890	8	30	743	1600	44401	43523	0	1321
isotig01964	SUNJ01006767.1	98.51	537	8	0	827	1363	204510	203974	0	948
isotig01965	SUNJ01006767.1	98.51	537	8	0	827	1363	204510	203974	0	948
isotig01966	SUNJ01006767.1	100	191	0	0	827	1017	204510	204320	3.69e-95	353
isotig01967	SUNJ01006767.1	100	184	0	0	826	1009	201063	200880	2.64e-91	340
isotig01968	SUNJ01011474.1	91.25	160	14	0	298	457	24743	24902	1.94e-54	219
isotig01969	SUNJ01009763.1	91.304	138	11	1	296	433	11170	11306	4.89e-45	187
isotig01970	SUNJ01004815.1	88.816	152	15	2	449	599	8030	7880	7.7e-45	185
isotig01971	SUNJ01004815.1	88.816	152	15	2	441	591	8030	7880	7.59e-45	185
isotig01972	SUNJ01002132.1	100	482	0	0	370	851	186331	185850	0	891
isotig01973	SUNJ01002132.1	100	482	0	0	370	851	186331	185850	0	891
isotig01974	SUNJ01002132.1	99.054	951	7	1	1	949	182994	182044	0	1705
isotig01975	SUNJ01005171.1	99.401	668	3	1	397	1064	256927	256261	0	1210
isotig01976	SUNJ01005171.1	99.401	668	3	1	360	1027	256927	256261	0	1210
isotig01977	SUNJ01005171.1	99.34	606	4	0	1	606	256546	255941	0	1098
isotig01978	SUNJ01005171.1	99.582	239	1	0	187	425	256179	255941	1.34e-120	436
isotig01982	SUNJ01014053.1	98.722	313	3	1	2	314	18350	18661	2.52e-156	555
isotig01984	SUNJ01009411.1	99.661	295	1	0	499	793	105524	105818	1.89e-151	540
isotig01987	SUNJ01006349.1	98.516	539	2	2	14	546	92001	92539	0	946
isotig01989	SUNJ01006349.1	98.33	539	3	2	14	546	92001	92539	0	941
isotig01990	SUNJ01007879.1	99.592	245	1	0	81	325	1767	1523	8.12e-124	448
isotig01991	SUNJ01002807.1	86.957	391	43	6	134	522	100880	100496	2.3e-119	433
isotig01992	SUNJ01007879.1	99.592	245	1	0	81	325	1767	1523	7.95e-124	448
isotig01993	SUNJ01014670.1	97.59	249	1	5	2	249	9270	9026	4.31e-116	422
isotig01994	SUNJ01005927.1	98.015	403	3	3	3	400	57910	57508	0	695
isotig01995	SUNJ01005927.1	91.923	260	1	2	271	510	57767	57508	3.3e-93	346
isotig01996	SUNJ01005927.1	93.548	403	4	4	3	383	57910	57508	6.45e-164	580
isotig01997	SUNJ01005927.1	97.772	404	3	4	3	401	57910	57508	0	691
isotig01998	SUNJ01004794.1	100	553	0	0	279	831	214458	215010	0	1022
isotig01999	SUNJ01005550.1	99.153	118	1	0	9	126	147433	147550	2.67e-53	213
isotig02000	SUNJ01005550.1	99.153	118	1	0	9	126	147433	147550	2.22e-53	213
isotig02001	SUNJ01008091.1	98.777	327	4	0	446	772	42943	43269	3.01e-164	582
isotig02002	SUNJ01008091.1	94.937	237	3	6	8	236	34	269	3.69e-98	363
isotig02003	SUNJ01008091.1	94.937	237	3	6	8	236	34	269	3.54e-98	363
isotig02004	SUNJ01008091.1	98.777	327	4	0	251	577	42943	43269	2.22e-164	582
isotig02005	SUNJ01000598.1	93.434	198	11	2	281	477	49767	49571	3.43e-77	292
isotig02006	SUNJ01000598.1	93.532	201	11	2	251	450	49770	49571	6.93e-79	298
isotig02007	SUNJ01002008.1	90.217	184	16	2	118	301	1935	2116	2.89e-61	239
isotig02008	SUNJ01004729.1	99.522	418	2	0	1207	1624	12070	11653	0	761
isotig02009	SUNJ01004729.1	99.522	418	2	0	1169	1586	12070	11653	0	761
isotig02010	SUNJ01007466.1	99.558	226	1	0	191	416	9750	9975	5.33e-113	412
isotig02011	SUNJ01007466.1	99.479	192	1	0	3	194	28809	28618	4.07e-94	350
isotig02012	SUNJ01004729.1	99.522	418	2	0	667	1084	12070	11653	0	761
isotig02013
isotig02014	SUNJ01000311.1	86.577	447	47	10	575	1019	158925	158490	2.36e-133	481
isotig02015	SUNJ01000311.1	86.577	447	47	10	575	1019	158925	158490	2.35e-133	481
isotig02016	SUNJ01000311.1	100	238	0	0	801	1038	92490	92727	3.37e-121	440
isotig02017	SUNJ01000311.1	100	238	0	0	801	1038	92490	92727	3.36e-121	440
isotig02018	SUNJ01000311.1	95.614	228	8	2	115	341	95604	95830	6.15e-99	364
isotig02019	SUNJ01000311.1	93.392	227	15	0	115	341	95604	95830	1.32e-90	337
isotig02020	SUNJ01014567.1	99.784	462	1	0	1413	1874	89108	88647	0	848
isotig02021	SUNJ01014567.1	99.784	462	1	0	1361	1822	89108	88647	0	848
isotig02022	SUNJ01005945.1	99.324	592	3	1	386	976	3360	2769	0	1070
isotig02023	SUNJ01005945.1	99.324	592	3	1	334	924	3360	2769	0	1070
isotig02024	SUNJ01005945.1	99.526	422	2	0	3	424	3813	3392	0	769
isotig02025	SUNJ01005945.1	99.32	294	2	0	79	372	3685	3392	1.68e-149	532
isotig02026	SUNJ01006415.1	98.284	1224	19	2	459	1682	169224	170445	0	2143
isotig02027	SUNJ01006415.1	98.284	1224	19	2	303	1526	169224	170445	0	2143
isotig02028	SUNJ01008710.1	97.358	265	6	1	6	270	93070	93333	3.08e-124	449
isotig02029	SUNJ01003444.1	98.235	170	3	0	424	593	16384	16215	9.28e-79	298
isotig02030	SUNJ01008710.1	97.358	265	6	1	6	270	93070	93333	2.47e-124	449
isotig02031	SUNJ01001938.1	100	174	0	0	107	280	26362	26535	4.1e-86	322
isotig02032	SUNJ01013537.1	99.625	533	2	0	144	676	178682	179214	0	974
isotig02033	SUNJ01013537.1	99.625	533	2	0	160	692	178682	179214	0	974
isotig02034	SUNJ01013537.1	99.696	329	1	0	420	748	181346	181674	2.27e-170	603
isotig02035	SUNJ01013537.1	99.696	329	1	0	436	764	181346	181674	2.32e-170	603
isotig02036	SUNJ01013537.1	98.286	350	4	2	114	463	178506	178853	2.25e-173	612
isotig02037	SUNJ01013537.1	98.745	478	4	2	2	479	178378	178853	0	848
isotig02038	SUNJ01009719.1	99.333	600	1	1	128	724	8350	8949	0	1083
isotig02039	SUNJ01009719.1	99.833	600	1	0	128	727	8350	8949	0	1103
isotig02040	SUNJ01009719.1	98.916	369	1	1	321	686	8581	8949	0	656
isotig02041	SUNJ01009719.1	99.729	369	1	0	321	689	8581	8949	0	676
isotig02042	SUNJ01009719.1	100	422	0	0	128	549	8350	8771	0	780
isotig02043	SUNJ01009719.1	100	197	0	0	128	324	8350	8546	9.64e-99	364
isotig02044	SUNJ01002228.1	98.157	1519	8	5	3	1513	50272	48766	0	2632
isotig02045	SUNJ01012473.1	99.506	1215	6	0	1	1215	229618	230832	0	2211
isotig02046	SUNJ01002228.1	98.157	1519	8	5	3	1513	50272	48766	0	2632
isotig02047	SUNJ01012473.1	99.506	1215	6	0	1	1215	229618	230832	0	2211
isotig02048	SUNJ01002228.1	99.519	208	1	0	54	261	17717	17510	3.72e-103	379
isotig02050	SUNJ01014559.1	99.858	705	1	0	5	709	156023	155319	0	1297
isotig02052	SUNJ01005319.1	99.708	342	1	0	90	431	202769	203110	1.95e-177	627
isotig02054	SUNJ01011809.1	99.866	749	1	0	388	1136	25970	25222	0	1378
isotig02055	SUNJ01011809.1	99.866	749	1	0	388	1136	25970	25222	0	1378
isotig02056	SUNJ01013440.1	99.284	698	3	1	550	1247	29919	30614	0	1260
isotig02057	SUNJ01013440.1	99.284	698	3	1	334	1031	29919	30614	0	1260
isotig02058	SUNJ01011809.1	99.099	222	1	1	413	634	13791	13571	9.52e-109	398
isotig02059	SUNJ01015694.1	99.383	1134	6	1	4	1137	206195	207327	0	2054
isotig02060	SUNJ01015694.1	99.383	1134	6	1	4	1137	206195	207327	0	2054
isotig02061	SUNJ01013225.1	98.911	643	4	2	1	641	240556	241197	0	1146
isotig02062	SUNJ01013225.1	99.199	1124	4	4	1	1122	240556	241676	0	2021
isotig02063	SUNJ01013225.1	98.911	643	4	2	1	641	240556	241197	0	1146
isotig02068	SUNJ01002777.1	99.209	253	2	0	450	702	275274	275526	2.07e-126	457
isotig02069	SUNJ01014258.1	99.109	449	3	1	1	449	45944	45497	0	806
isotig02070	SUNJ01014258.1	99.109	449	3	1	1	449	45944	45497	0	806
isotig02071	SUNJ01014258.1	99.695	328	1	0	2	329	31764	31437	6.19e-170	601
isotig02072	SUNJ01014258.1	99.111	450	3	1	1	450	45944	45496	0	808
isotig02073	SUNJ01014258.1	99.696	329	1	0	2	330	31764	31436	1.31e-170	603
isotig02074	SUNJ01011870.1	99.12	568	4	1	529	1096	95026	94460	0	1020
isotig02075	SUNJ01011870.1	99.12	568	4	1	233	800	95026	94460	0	1020
isotig02076	SUNJ01011870.1	98.667	225	3	0	529	753	89775	89551	3.17e-109	399
isotig02077	SUNJ01011870.1	98.122	213	3	1	60	272	126156	125945	1.41e-100	370
isotig02078	SUNJ01011870.1	98.667	225	3	0	233	457	89775	89551	1.88e-109	399
isotig02079	SUNJ01009153.1	99.556	450	2	0	317	766	28087	27638	0	821
isotig02084	SUNJ01010358.1	93.147	394	24	2	340	732	29412	29021	4.76e-162	575
isotig02085	SUNJ01003788.1	98.889	360	3	1	2	360	18788	19147	0	641
isotig02086	SUNJ01003788.1	99.59	244	1	0	94	337	18905	19148	2.26e-123	446
isotig02087	SUNJ01003788.1	98.892	361	3	1	2	361	18788	19148	0	643
isotig02088	SUNJ01012478.1	96.825	441	5	1	1	432	270089	269649	0	728
isotig02089	SUNJ01007613.1	100	174	0	0	14	187	22346	22173	4.99e-86	322
isotig02090	SUNJ01007613.1	100	174	0	0	14	187	22346	22173	5.19e-86	322
isotig02091	SUNJ01007613.1	100	137	0	0	328	464	21816	21680	1.58e-65	254
isotig02092	SUNJ01007613.1	99.324	148	1	0	216	363	22002	21855	5.91e-70	268
isotig02093	SUNJ01007613.1	100	124	0	0	379	502	21816	21693	2.88e-58	230
isotig02096	SUNJ01010179.1	100	123	0	0	364	486	12220	12342	1e-57	228
isotig02097	SUNJ01015521.1	90.286	175	1	1	268	426	79140	79314	6.77e-54	215
isotig02098	SUNJ01010179.1	99.55	222	1	0	94	315	12121	12342	2.7e-111	405
isotig02099	SUNJ01000324.1	99.666	898	2	1	723	1620	123814	122918	0	1640
isotig02100	SUNJ01000324.1	99.666	898	2	1	723	1620	123814	122918	0	1640
isotig02101	SUNJ01000324.1	99.666	898	2	1	723	1620	123814	122918	0	1640
isotig02102	SUNJ01000657.1	97.326	2169	31	6	1	2168	163063	165205	0	3659
isotig02105	SUNJ01011401.1	99.678	932	2	1	1279	2210	24343	23413	0	1703
isotig02107	SUNJ01000203.1	99.318	1026	1	2	228	1249	5596	6619	0	1851
isotig02108	SUNJ01000203.1	99.765	851	1	1	1528	2377	7555	8405	0	1559
isotig02109	SUNJ01003574.1	92.41	751	15	30	118	829	20612	19865	0	1033
isotig02110	SUNJ01003574.1	92.41	751	15	30	118	829	20612	19865	0	1033
isotig02111	SUNJ01006904.1	99.717	1412	4	0	1	1412	45464	44053	0	2586
isotig02112	SUNJ01006904.1	99.717	1412	4	0	1	1412	45464	44053	0	2586
isotig02113	SUNJ01014188.1	99.478	766	4	0	1	766	131775	132540	0	1393
isotig02115	SUNJ01010620.1	95.444	2173	91	4	319	2490	74360	76525	0	3458
isotig02116	SUNJ01010620.1	94.805	2233	100	6	319	2549	74360	76578	0	3467
isotig02119	SUNJ01013256.1	99.531	213	1	0	139	351	81836	82048	1.21e-105	388
isotig02120	SUNJ01013256.1	99.531	213	1	0	139	351	81836	82048	1.17e-105	388
isotig02121	SUNJ01013256.1	99.531	213	1	0	139	351	81836	82048	1.18e-105	388
isotig02122	SUNJ01013256.1	99.531	213	1	0	139	351	81836	82048	1.15e-105	388
isotig02123	SUNJ01001013.1	99.619	788	3	0	1	788	106015	105228	0	1439
isotig02124	SUNJ01001013.1	99.619	788	3	0	1	788	106015	105228	0	1439
isotig02125	SUNJ01001013.1	99.619	788	3	0	1	788	106015	105228	0	1439
isotig02126	SUNJ01001013.1	99.429	525	3	0	1	525	106015	105491	0	953
isotig02127	SUNJ01014979.1	94.215	363	21	0	339	701	8907	8545	1.56e-155	555
isotig02128	SUNJ01014979.1	94.215	363	21	0	255	617	8907	8545	1.49e-155	555
isotig02129	SUNJ01006673.1	100	456	0	0	304	759	67884	67429	0	843
isotig02130	SUNJ01014979.1	91.723	447	34	3	2	445	9284	8838	4.63e-175	617
isotig02131	SUNJ01002278.1	98.744	876	9	2	747	1621	140407	141281	0	1555
isotig02132	SUNJ01008678.1	97.926	434	5	4	655	1088	136872	137301	0	749
isotig02133	SUNJ01008678.1	98.372	737	7	5	250	986	136570	137301	0	1290
isotig02134	SUNJ01008678.1	98.596	855	7	5	96	950	136452	137301	0	1507
isotig02135	SUNJ01009690.1	99	500	5	0	731	1230	552300	551801	0	896
isotig02136	SUNJ01009690.1	98.996	498	5	0	579	1076	552298	551801	0	893
isotig02137	SUNJ01009690.1	98.886	359	4	0	220	578	554417	554059	0	641
isotig02138	SUNJ01009690.1	99.17	241	2	0	220	460	555452	555212	5.18e-120	435
isotig02139	SUNJ01003795.1	98.663	673	5	2	226	895	52059	51388	0	1190
isotig02140	SUNJ01003795.1	99.818	549	1	0	14	562	32495	31947	0	1009
isotig02141	SUNJ01003795.1	100	355	0	0	1	355	2495	2141	0	656
isotig02142	SUNJ01003795.1	99.278	277	2	0	254	530	835	559	9.13e-140	501
isotig02143	SUNJ01015802.1	99.156	829	5	2	358	1186	98412	97586	0	1491
isotig02144	SUNJ01015802.1	99.113	451	2	2	358	808	98412	97964	0	809
isotig02145	SUNJ01001434.1	98.913	368	3	1	568	935	56478	56112	0	656
isotig02146	SUNJ01001434.1	99.058	531	5	0	2	532	56642	56112	0	953
isotig02151	SUNJ01004871.1	100	380	0	0	529	908	61115	61494	0	702
isotig02152	SUNJ01004871.1	100	318	0	0	529	846	61115	61432	9.82e-166	588
isotig02153	SUNJ01009817.1	99.502	201	1	0	188	388	97061	97261	3.89e-99	366
isotig02154	SUNJ01009817.1	99.422	173	0	1	1	173	100430	100601	2.54e-83	313
isotig02155	SUNJ01001569.1	99.388	490	3	0	609	1098	75477	74988	0	889
isotig02156	SUNJ01001569.1	99.388	490	3	0	442	931	75477	74988	0	889
isotig02157	SUNJ01001569.1	99.388	490	3	0	324	813	75477	74988	0	889
isotig02158	SUNJ01011016.1	81.982	111	11	4	392	502	22024	22125	6.93e-15	86.1
isotig02159	SUNJ01006546.1	99.519	832	4	0	1	832	365774	366605	0	1515
isotig02160	SUNJ01006546.1	99.519	832	4	0	1	832	365774	366605	0	1515
isotig02161	SUNJ01006546.1	100	270	0	0	55	324	370544	370813	2.03e-139	499
isotig02162	SUNJ01006546.1	100	121	0	0	55	175	370544	370664	9.72e-57	224
isotig02165	SUNJ01004446.1	99.074	216	1	1	65	279	125177	125392	2.2e-105	387
isotig02166	SUNJ01004446.1	99.5	200	1	0	1	200	144160	143961	6.03e-99	364
isotig02167	SUNJ01008446.1	99.827	577	1	0	605	1181	97214	96638	0	1061
isotig02168	SUNJ01008446.1	99.827	577	1	0	611	1187	97214	96638	0	1061
isotig02169	SUNJ01014226.1	98.611	288	1	3	235	521	125849	125564	1.24e-141	507
isotig02170	SUNJ01013153.1	97.015	469	10	2	1	466	31399	30932	0	785
isotig02172	SUNJ01007588.1	99.121	455	4	0	38	492	8071	7617	0	819
isotig02173	SUNJ01007588.1	98.291	234	4	0	223	456	7850	7617	8.67e-113	411
isotig02174	SUNJ01004121.1	96.899	129	4	0	485	613	89928	89800	2.77e-54	217
isotig02175	SUNJ01004582.1	99.494	1384	7	0	1	1384	30645	32028	0	2518
isotig02177	SUNJ01004582.1	99.323	591	4	0	1	591	30645	31235	0	1070
isotig02178	SUNJ01015165.1	99.663	297	1	0	620	916	126436	126732	1.7e-152	544
isotig02179	SUNJ01015165.1	99.663	297	1	0	644	940	126436	126732	1.74e-152	544
isotig02180	SUNJ01015165.1	99.663	297	1	0	622	918	126436	126732	1.7e-152	544
isotig02181	SUNJ01004726.1	92.954	369	16	4	174	534	39568	39934	2.72e-148	529
isotig02182	SUNJ01001700.1	99.435	1062	6	0	1	1062	155482	154421	0	1929
isotig02184	SUNJ01001700.1	99.099	444	4	0	1	444	155482	155039	0	798
isotig02189	SUNJ01010463.1	98.498	466	7	0	1	466	94997	95462	0	822
isotig02190	SUNJ01015625.1	99.558	679	3	0	1039	1717	122711	122033	0	1238
isotig02191	SUNJ01015625.1	99.682	314	1	0	213	526	153036	153349	3.37e-162	575
isotig02192	SUNJ01015625.1	99.669	302	1	0	151	452	151812	151511	1.35e-155	553
isotig02193	SUNJ01015625.1	99.054	423	4	0	2	424	153108	152686	0	760
isotig02198	SUNJ01004236.1	97.866	1406	23	6	28	1432	285059	286458	0	2423
isotig02201	SUNJ01004236.1	95	200	6	3	233	432	285254	285059	9.09e-83	311
isotig02202	SUNJ01002394.1	99.095	1437	12	1	1	1436	85435	86871	0	2580
isotig02203	SUNJ01011929.1	99.7	333	1	0	1	333	57372	57704	1.13e-172	610
isotig02204	SUNJ01002394.1	99.332	449	3	0	1	449	85435	85883	0	813
isotig02205	SUNJ01002394.1	99.408	169	1	0	1	169	85435	85603	6.93e-82	307
isotig02206	SUNJ01002330.1	99.5	1001	5	0	459	1459	476748	477748	0	1821
isotig02207	SUNJ01002330.1	99.588	243	1	0	376	618	476419	476661	1.67e-122	444
isotig02208	SUNJ01013732.1	96.407	167	6	0	240	406	58120	57954	2.93e-72	276
isotig02209	SUNJ01013732.1	96.918	292	8	1	1	292	58244	57954	2.42e-136	488
isotig02210	SUNJ01000112.1	99.437	533	3	0	1009	1541	300462	299930	0	968
isotig02211	SUNJ01011899.1	100	278	0	0	788	1065	154155	153878	1.56e-143	514
isotig02212	SUNJ01005659.1	98.667	300	4	0	3	302	29530	29231	1.41e-149	532
isotig02214	SUNJ01002846.1	95.404	544	13	10	376	910	11276	10736	0	856
isotig02216	SUNJ01002846.1	94.537	421	12	11	1	410	11762	11342	0	640
isotig02217	SUNJ01000863.1	99.427	524	2	1	516	1039	217502	216980	0	950
isotig02218	SUNJ01000863.1	99.291	282	2	0	686	967	217261	216980	1.82e-142	510
isotig02219	SUNJ01000863.1	99.288	281	2	0	142	422	228420	228140	4.41e-142	508
isotig02220	SUNJ01008813.1	100	268	0	0	1	268	41238	40971	1.31e-138	496
isotig02221	SUNJ01015717.1	96.927	358	3	7	1	351	156154	156510	1.49e-167	593
isotig02222	SUNJ01015717.1	96.927	358	3	7	1	351	156154	156510	1.45e-167	593
isotig02223	SUNJ01010032.1	97.968	689	1	1	5	680	2066	2754	0	1182
isotig02224	SUNJ01015717.1	96.936	359	3	7	1	352	156154	156511	2.84e-168	595
isotig02225	SUNJ01014100.1	99.638	1105	3	1	194	1297	54444	53340	0	2017
isotig02226	SUNJ01001440.1	100	399	0	0	143	541	36307	35909	0	737
isotig02227	SUNJ01000724.1	97.368	114	1	2	175	288	2448	2559	4.48e-47	193
isotig02229	SUNJ01003926.1	97.059	374	6	5	197	565	16632	17005	3.62e-177	625
isotig02230	SUNJ01003926.1	97.414	232	2	4	300	529	13059	13288	3.73e-107	392
isotig02231	SUNJ01005447.1	95.802	667	26	2	1	666	128840	129505	0	1075
isotig02232	SUNJ01005447.1	95.352	667	25	4	1	662	128840	129505	0	1055
isotig02233	SUNJ01005447.1	94.76	668	34	1	1	668	128840	129506	0	1038
isotig02234	SUNJ01005447.1	95.808	668	27	1	1	668	128840	129506	0	1077
isotig02235	SUNJ01014317.1	99.306	720	2	2	400	1117	13773	13055	0	1299
isotig02236	SUNJ01014317.1	98.983	295	1	1	1	293	16017	15723	1.03e-147	527
isotig02237	SUNJ01014317.1	97.749	311	2	4	1	309	16017	15710	6.68e-149	531
isotig02238	SUNJ01014317.1	97.749	311	2	4	1	309	16017	15710	5.93e-149	531
isotig02239	SUNJ01010606.1	99.742	388	1	0	1	388	164139	163752	0	712
isotig02240	SUNJ01011379.1	100	320	0	0	43	362	243193	243512	3.87e-167	592
isotig02241	SUNJ01012518.1	98.88	357	4	0	208	564	316898	316542	0	638
isotig02242	SUNJ01015930.1	98.93	561	4	1	2	562	62014	61456	0	1002
isotig02243	SUNJ01015165.1	99.211	380	2	1	15	394	83175	83553	0	684
isotig02244	SUNJ01015165.1	99.211	380	2	1	15	394	83175	83553	0	684
isotig02246	SUNJ01011796.1	98.503	735	9	2	1	734	213166	212433	0	1295
isotig02247	SUNJ01011796.1	98.403	501	6	2	114	613	212932	212433	0	880
isotig02248	SUNJ01011454.1	92.958	497	32	3	2	497	17007	17501	0	721
isotig02249	SUNJ01011454.1	92.54	496	36	1	2	497	17007	17501	0	710
isotig02250	SUNJ01000371.1	99.787	941	2	0	20	960	147722	146782	0	1727
[truncated: 14,553 more rows]
