# Supplementary material for: In silico characterisation of the complete Ly6 protein family in Fasciola gigantica supported through transcriptomics of the newly-excysted juveniles
Source: Mol Omics. 2021 Nov 8;18(1):45–56. doi: 10.1039/d1mo00254f (PMC8763315; doi:10.1039/d1mo00254f)
Supplement: MO-018-D1MO00254F-s002 [file MO-018-D1MO00254F-s002.xlsx]

## Sheet: GO enrichment
GO term ID	GO term category	Enrichment in NEJ transcriptome vs genome	name	Ratio in study	Ratio in population	P value (FDR corrected)	Significant at P < 0.05	Significant at P < 0.001
GO:0006412	Biological Process	e	translation	116/3819	151/6807	0	Yes	Yes
GO:0000398	Biological Process	e	mRNA splicing, via spliceosome	67/3819	82/6807	0	Yes	Yes
GO:0007018	Biological Process	p	microtubule-based movement	16/3819	85/6807	0	Yes	Yes
GO:0036158	Biological Process	p	outer dynein arm assembly	0/3819	20/6807	0	Yes	Yes
GO:0035556	Biological Process	p	intracellular signal transduction	60/3819	160/6807	0	Yes	Yes
GO:0060271	Biological Process	p	cilium morphogenesis	22/3819	75/6807	0	Yes	Yes
GO:0005840	Cellular component	e	ribosome	123/3819	160/6807	0	Yes	Yes
GO:0005739	Cellular component	e	mitochondrion	181/3819	250/6807	0	Yes	Yes
GO:0005759	Cellular component	e	mitochondrial matrix	47/3819	55/6807	0	Yes	Yes
GO:0005930	Cellular component	p	axoneme	5/3819	53/6807	0	Yes	Yes
GO:0005874	Cellular component	p	microtubule	63/3819	183/6807	0	Yes	Yes
GO:0030286	Cellular component	p	dynein complex	36/3819	107/6807	0	Yes	Yes
GO:0003723	Molecular Function	e	RNA binding	273/3819	378/6807	0	Yes	Yes
GO:0003735	Molecular Function	e	structural constituent of ribosome	128/3819	173/6807	0	Yes	Yes
GO:0003777	Molecular Function	p	microtubule motor activity	14/3819	81/6807	0	Yes	Yes
GO:0051959	Molecular Function	p	dynein light intermediate chain binding	11/3819	54/6807	0	Yes	Yes
GO:0016887	Molecular Function	p	ATPase activity	49/3819	143/6807	0	Yes	Yes
GO:0001067	Molecular Function	p	regulatory region nucleic acid binding	26/3819	90/6807	0	Yes	Yes
GO:0045505	Molecular Function	p	dynein intermediate chain binding	12/3819	55/6807	0	Yes	Yes
GO:0008234	Molecular Function	p	cysteine-type peptidase activity	12/3819	51/6807	0	Yes	Yes
GO:0000981	Molecular Function	p	RNA polymerase II transcription factor activity, sequence-specific DNA binding	37/3819	109/6807	0	Yes	Yes
GO:0005681	Cellular component	e	spliceosomal complex	32/3819	35/6807	0.002	Yes	No
GO:0031514	Cellular component	p	motile cilium	24/3819	78/6807	0.002	Yes	No
GO:0005200	Molecular Function	p	structural constituent of cytoskeleton	18/3819	64/6807	0.002	Yes	No
GO:0004175	Molecular Function	p	endopeptidase activity	7/3819	36/6807	0.002	Yes	No
GO:0043565	Molecular Function	p	sequence-specific DNA binding	34/3819	99/6807	0.004	Yes	No
GO:0060285	Biological Process	p	cilium-dependent cell motility	0/3819	13/6807	0.008	Yes	No
GO:0005783	Cellular component	e	endoplasmic reticulum	153/3819	218/6807	0.008	Yes	No
GO:0005829	Cellular component	e	cytosol	448/3819	706/6807	0.01	Yes	No
GO:0007275	Biological Process	p	multicellular organismal development	23/3819	72/6807	0.012	Yes	No
GO:0005576	Cellular component	p	extracellular region	66/3819	164/6807	0.018	Yes	No
GO:0003341	Biological Process	p	cilium movement	3/3819	22/6807	0.022	Yes	No
GO:0098798	Cellular component	e	mitochondrial protein complex	25/3819	27/6807	0.022	Yes	No
GO:0048468	Biological Process	p	cell development	6/3819	30/6807	0.024	Yes	No
GO:0071805	Biological Process	p	potassium ion transmembrane transport	20/3819	64/6807	0.024	Yes	No
GO:0005789	Cellular component	e	endoplasmic reticulum membrane	93/3819	127/6807	0.024	Yes	No
GO:0005743	Cellular component	e	mitochondrial inner membrane	47/3819	58/6807	0.038	Yes	No
GO:0019866	Cellular component	e	organelle inner membrane	29/3819	33/6807	0.072	No	No
GO:0000049	Molecular Function	e	tRNA binding	29/3819	33/6807	0.072	No	No
GO:0005654	Cellular component	e	nucleoplasm	177/3819	263/6807	0.076	No	No
GO:0022900	Biological Process	e	electron transport chain	35/3819	42/6807	0.118	No	No
GO:0061512	Biological Process	p	protein localization to cilium	2/3819	17/6807	0.12	No	No
GO:0005524	Molecular Function	p	ATP binding	565/3819	1105/6807	0.136	No	No
GO:0006468	Biological Process	p	protein phosphorylation	159/3819	341/6807	0.148	No	No
GO:0005509	Molecular Function	p	calcium ion binding	177/3819	376/6807	0.148	No	No
GO:0034220	Biological Process	p	ion transmembrane transport	26/3819	74/6807	0.158	No	No
GO:0000280	Biological Process	p	nuclear division	5/3819	25/6807	0.158	No	No
GO:0005929	Cellular component	p	cilium	18/3819	56/6807	0.166	No	No
GO:0005814	Cellular component	p	centriole	6/3819	28/6807	0.166	No	No
GO:0036159	Biological Process	p	inner dynein arm assembly	1/3819	13/6807	0.176	No	No
GO:0042552	Biological Process	p	myelination	1/3819	13/6807	0.176	No	No
GO:0007368	Biological Process	p	determination of left/right symmetry	10/3819	37/6807	0.19	No	No
GO:0006397	Biological Process	e	mRNA processing	43/3819	54/6807	0.212	No	No
GO:0071011	Cellular component	e	precatalytic spliceosome	17/3819	18/6807	0.24	No	No
GO:0004672	Molecular Function	p	protein kinase activity	97/3819	218/6807	0.24	No	No
GO:0005730	Cellular component	e	nucleolus	94/3819	133/6807	0.25	No	No
GO:0030326	Biological Process	p	embryonic limb morphogenesis	0/3819	9/6807	0.264	No	No
GO:0050808	Biological Process	p	synapse organization	0/3819	9/6807	0.264	No	No
GO:0070679	Molecular Function	p	inositol 1,4,5 trisphosphate binding	0/3819	9/6807	0.264	No	No
GO:0009953	Biological Process	p	dorsal/ventral pattern formation	5/3819	24/6807	0.282	No	No
GO:0001216	Molecular Function	p	bacterial-type RNA polymerase transcriptional activator activity, sequence-specific DNA binding	3/3819	19/6807	0.282	No	No
GO:0035725	Biological Process	p	sodium ion transmembrane transport	10/3819	36/6807	0.284	No	No
GO:0045165	Biological Process	p	cell fate commitment	1/3819	12/6807	0.316	No	No
GO:0030992	Cellular component	p	intraciliary transport particle B	1/3819	12/6807	0.316	No	No
GO:0006457	Biological Process	e	protein folding	62/3819	84/6807	0.358	No	No
GO:0006413	Biological Process	e	translational initiation	63/3819	85/6807	0.358	No	No
GO:0046540	Cellular component	e	U4/U6 x U5 tri-snRNP complex	13/3819	13/6807	0.37	No	No
GO:1990904	Cellular component	e	ribonucleoprotein complex	68/3819	93/6807	0.432	No	No
GO:0007010	Biological Process	p	cytoskeleton organization	34/3819	88/6807	0.458	No	No
GO:0006816	Biological Process	p	calcium ion transport	4/3819	20/6807	0.482	No	No
GO:0008094	Molecular Function	p	DNA-dependent ATPase activity	4/3819	20/6807	0.482	No	No
GO:0007626	Biological Process	p	locomotory behavior	14/3819	44/6807	0.49	No	No
GO:0021782	Biological Process	p	glial cell development	0/3819	8/6807	0.506	No	No
GO:0001570	Biological Process	p	vasculogenesis	0/3819	8/6807	0.506	No	No
GO:0003743	Molecular Function	e	translation initiation factor activity	63/3819	86/6807	0.506	No	No
GO:0006364	Biological Process	e	rRNA processing	33/3819	41/6807	0.51	No	No
GO:0005921	Cellular component	p	gap junction	8/3819	30/6807	0.516	No	No
GO:1902494	Cellular component	e	catalytic complex	21/3819	24/6807	0.528	No	No
GO:0051082	Molecular Function	e	unfolded protein binding	57/3819	77/6807	0.544	No	No
GO:0005774	Cellular component	e	vacuolar membrane	15/3819	16/6807	0.56	No	No
GO:0016616	Molecular Function	p	oxidoreductase activity, acting on the CH-OH group of donors, NAD or NADP as acceptor	1/3819	11/6807	0.584	No	No
GO:0000145	Cellular component	e	exocyst	12/3819	12/6807	0.628	No	No
GO:0006886	Biological Process	e	intracellular protein transport	98/3819	142/6807	0.686	No	No
GO:0007165	Biological Process	p	signal transduction	84/3819	187/6807	0.694	No	No
GO:0043005	Cellular component	p	neuron projection	26/3819	69/6807	0.708	No	No
GO:0036126	Cellular component	p	sperm flagellum	4/3819	19/6807	0.72	No	No
GO:0005216	Molecular Function	p	ion channel activity	8/3819	29/6807	0.738	No	No
GO:0031227	Cellular component	e	intrinsic component of endoplasmic reticulum membrane	18/3819	20/6807	0.742	No	No
GO:0003700	Molecular Function	p	transcription factor activity, sequence-specific DNA binding	87/3819	192/6807	0.754	No	No
GO:0045893	Biological Process	p	positive regulation of transcription, DNA-templated	36/3819	90/6807	0.768	No	No
GO:0022618	Biological Process	e	ribonucleoprotein complex assembly	25/3819	30/6807	0.77	No	No
GO:0006508	Biological Process	p	proteolysis	152/3819	318/6807	0.77	No	No
GO:0004888	Molecular Function	p	transmembrane signaling receptor activity	10/3819	34/6807	0.776	No	No
GO:0015031	Biological Process	e	protein transport	67/3819	94/6807	0.83	No	No
GO:0007168	Biological Process	p	receptor guanylyl cyclase signaling pathway	0/3819	7/6807	0.83	No	No
GO:0005858	Cellular component	p	axonemal dynein complex	0/3819	7/6807	0.83	No	No
GO:0009055	Molecular Function	e	electron carrier activity	31/3819	39/6807	0.83	No	No
GO:0004563	Molecular Function	p	beta-N-acetylhexosaminidase activity	0/3819	7/6807	0.83	No	No
GO:0017046	Molecular Function	p	peptide hormone binding	0/3819	7/6807	0.83	No	No
GO:0031966	Cellular component	e	mitochondrial membrane	10/3819	10/6807	0.836	No	No
GO:0070469	Cellular component	e	respiratory chain	11/3819	11/6807	0.894	No	No
GO:0030324	Biological Process	p	lung development	2/3819	13/6807	0.914	No	No
GO:0044458	Biological Process	p	motile cilium assembly	2/3819	13/6807	0.914	No	No
GO:0097546	Cellular component	p	ciliary base	2/3819	13/6807	0.914	No	No
GO:0018212	Biological Process	p	peptidyl-tyrosine modification	8/3819	28/6807	0.93	No	No
GO:0036064	Cellular component	p	ciliary basal body	9/3819	30/6807	0.962	No	No
GO:0003678	Molecular Function	p	DNA helicase activity	6/3819	23/6807	0.964	No	No
GO:0046907	Biological Process	e	intracellular transport	27/3819	34/6807	0.966	No	No
GO:0034765	Biological Process	p	regulation of ion transmembrane transport	18/3819	50/6807	0.966	No	No
GO:0000139	Cellular component	e	Golgi membrane	56/3819	78/6807	0.966	No	No
GO:0003677	Molecular Function	p	DNA binding	218/3819	439/6807	0.966	No	No
GO:0072657	Biological Process	e	protein localization to membrane	9/3819	9/6807	0.972	No	No
GO:0006446	Biological Process	e	regulation of translational initiation	9/3819	9/6807	0.972	No	No
GO:0030687	Cellular component	e	preribosome, large subunit precursor	9/3819	9/6807	0.972	No	No
GO:0005795	Cellular component	e	Golgi stack	9/3819	9/6807	0.972	No	No
GO:0070588	Biological Process	p	calcium ion transmembrane transport	12/3819	36/6807	0.994	No	No
GO:0030705	Biological Process	p	cytoskeleton-dependent intracellular transport	12/3819	36/6807	0.994	No	No
GO:0007411	Biological Process	p	axon guidance	12/3819	36/6807	0.994	No	No
GO:0006858	Biological Process	p	extracellular transport	1/3819	10/6807	0.994	No	No
GO:0042555	Cellular component	p	MCM complex	1/3819	10/6807	0.994	No	No
GO:0045503	Molecular Function	p	dynein light chain binding	1/3819	10/6807	0.994	No	No
GO:0006270	Biological Process	p	DNA replication initiation	3/3819	15/6807	0.996	No	No
GO:0009898	Cellular component	p	cytoplasmic side of plasma membrane	3/3819	15/6807	0.996	No	No
GO:0051301	Biological Process	e	cell division	65/3819	93/6807	0.998	No	No
GO:0009408	Biological Process	e	response to heat	24/3819	30/6807	0.998	No	No
GO:0031145	Biological Process	e	anaphase-promoting complex-dependent proteasomal ubiquitin-dependent protein catabolic process	12/3819	13/6807	0.998	No	No
GO:0030433	Biological Process	e	ER-associated ubiquitin-dependent protein catabolic process	22/3819	27/6807	0.998	No	No
GO:0001736	Biological Process	p	establishment of planar polarity	0/3819	6/6807	0.998	No	No
GO:0043052	Biological Process	p	thermotaxis	0/3819	6/6807	0.998	No	No
GO:0050908	Biological Process	p	detection of light stimulus involved in visual perception	0/3819	6/6807	0.998	No	No
GO:0016339	Biological Process	p	calcium-dependent cell-cell adhesion via plasma membrane cell adhesion molecules	0/3819	6/6807	0.998	No	No
GO:0090102	Biological Process	p	cochlea development	0/3819	6/6807	0.998	No	No
GO:0002224	Biological Process	p	toll-like receptor signaling pathway	0/3819	6/6807	0.998	No	No
GO:0031175	Biological Process	p	neuron projection development	2/3819	12/6807	0.998	No	No
GO:0006814	Biological Process	p	sodium ion transport	2/3819	12/6807	0.998	No	No
GO:0006811	Biological Process	p	ion transport	11/3819	34/6807	0.998	No	No
GO:0007417	Biological Process	p	central nervous system development	10/3819	31/6807	0.998	No	No
GO:0016607	Cellular component	e	nuclear speck	45/3819	62/6807	0.998	No	No
GO:0030991	Cellular component	p	intraciliary transport particle A	0/3819	6/6807	0.998	No	No
GO:1990351	Cellular component	p	transporter complex	9/3819	29/6807	0.998	No	No
GO:0016324	Cellular component	p	apical plasma membrane	16/3819	44/6807	0.998	No	No
GO:0000062	Molecular Function	e	fatty-acyl-CoA binding	12/3819	13/6807	0.998	No	No
GO:0015079	Molecular Function	p	potassium ion transmembrane transporter activity	0/3819	6/6807	0.998	No	No
GO:0005272	Molecular Function	p	sodium channel activity	6/3819	22/6807	0.998	No	No
GO:0008017	Molecular Function	p	microtubule binding	38/3819	90/6807	0.998	No	No
GO:0008063	Biological Process	e	Toll signaling pathway	14/3819	16/6807	1	No	No
GO:0032007	Biological Process	e	negative regulation of TOR signaling	8/3819	8/6807	1	No	No
GO:0045292	Biological Process	e	mRNA cis splicing, via spliceosome	8/3819	8/6807	1	No	No
GO:0009793	Biological Process	e	embryo development ending in seed dormancy	8/3819	8/6807	1	No	No
GO:1903830	Biological Process	e	magnesium ion transmembrane transport	8/3819	8/6807	1	No	No
GO:0006260	Biological Process	e	DNA replication	48/3819	67/6807	1	No	No
GO:0002181	Biological Process	e	cytoplasmic translation	20/3819	25/6807	1	No	No
GO:0042254	Biological Process	e	ribosome biogenesis	27/3819	35/6807	1	No	No
GO:0061077	Biological Process	e	chaperone-mediated protein folding	7/3819	7/6807	1	No	No
GO:0070979	Biological Process	e	protein K11-linked ubiquitination	7/3819	7/6807	1	No	No
GO:0090382	Biological Process	e	phagosome maturation	7/3819	7/6807	1	No	No
GO:0009060	Biological Process	e	aerobic respiration	7/3819	7/6807	1	No	No
GO:0006888	Biological Process	e	ER to Golgi vesicle-mediated transport	19/3819	24/6807	1	No	No
GO:0055114	Biological Process	e	oxidation-reduction process	225/3819	364/6807	1	No	No
GO:0006631	Biological Process	e	fatty acid metabolic process	10/3819	11/6807	1	No	No
GO:1990542	Biological Process	e	mitochondrial transmembrane transport	10/3819	11/6807	1	No	No
GO:0016226	Biological Process	e	iron-sulfur cluster assembly	15/3819	18/6807	1	No	No
GO:0061025	Biological Process	e	membrane fusion	12/3819	14/6807	1	No	No
GO:0015867	Biological Process	e	ATP transport	24/3819	32/6807	1	No	No
GO:0006417	Biological Process	e	regulation of translation	29/3819	40/6807	1	No	No
GO:0001732	Biological Process	e	formation of cytoplasmic translation initiation complex	6/3819	6/6807	1	No	No
GO:0006122	Biological Process	e	mitochondrial electron transport, ubiquinol to cytochrome c	6/3819	6/6807	1	No	No
GO:0007492	Biological Process	e	endoderm development	6/3819	6/6807	1	No	No
GO:0006450	Biological Process	e	regulation of translational fidelity	6/3819	6/6807	1	No	No
GO:0016556	Biological Process	e	mRNA modification	6/3819	6/6807	1	No	No
GO:0072593	Biological Process	e	reactive oxygen species metabolic process	6/3819	6/6807	1	No	No
GO:0015012	Biological Process	e	heparan sulfate proteoglycan biosynthetic process	6/3819	6/6807	1	No	No
GO:0030150	Biological Process	e	protein import into mitochondrial matrix	6/3819	6/6807	1	No	No
GO:0071466	Biological Process	e	cellular response to xenobiotic stimulus	6/3819	6/6807	1	No	No
GO:0007021	Biological Process	e	tubulin complex assembly	6/3819	6/6807	1	No	No
GO:0031167	Biological Process	e	rRNA methylation	6/3819	6/6807	1	No	No
GO:0006998	Biological Process	e	nuclear envelope organization	6/3819	6/6807	1	No	No
GO:0018231	Biological Process	e	peptidyl-S-diacylglycerol-L-cysteine biosynthetic process from peptidyl-cysteine	13/3819	16/6807	1	No	No
GO:0008033	Biological Process	e	tRNA processing	13/3819	16/6807	1	No	No
GO:0006612	Biological Process	e	protein targeting to membrane	13/3819	16/6807	1	No	No
GO:0034504	Biological Process	e	protein localization to nucleus	13/3819	16/6807	1	No	No
GO:0000027	Biological Process	e	ribosomal large subunit assembly	14/3819	17/6807	1	No	No
GO:0032981	Biological Process	e	mitochondrial respiratory chain complex I assembly	11/3819	13/6807	1	No	No
GO:0000278	Biological Process	p	mitotic cell cycle	32/3819	77/6807	1	No	No
GO:0030182	Biological Process	p	neuron differentiation	4/3819	17/6807	1	No	No
GO:0022402	Biological Process	p	cell cycle process	4/3819	17/6807	1	No	No
GO:0003006	Biological Process	p	developmental process involved in reproduction	4/3819	17/6807	1	No	No
GO:0030317	Biological Process	p	sperm motility	11/3819	33/6807	1	No	No
GO:0042752	Biological Process	p	regulation of circadian rhythm	3/3819	14/6807	1	No	No
GO:0051480	Biological Process	p	regulation of cytosolic calcium ion concentration	3/3819	14/6807	1	No	No
GO:0010720	Biological Process	p	positive regulation of cell development	3/3819	14/6807	1	No	No
GO:0051962	Biological Process	p	positive regulation of nervous system development	3/3819	14/6807	1	No	No
GO:0007422	Biological Process	p	peripheral nervous system development	1/3819	9/6807	1	No	No
GO:0070286	Biological Process	p	axonemal dynein complex assembly	1/3819	9/6807	1	No	No
GO:0007638	Biological Process	p	mechanosensory behavior	1/3819	9/6807	1	No	No
GO:0006278	Biological Process	p	RNA-dependent DNA replication	2/3819	11/6807	1	No	No
GO:0007635	Biological Process	p	chemosensory behavior	2/3819	11/6807	1	No	No
GO:0000281	Biological Process	p	mitotic cytokinesis	6/3819	21/6807	1	No	No
GO:0032508	Biological Process	p	DNA duplex unwinding	19/3819	50/6807	1	No	No
GO:0007186	Biological Process	p	G-protein coupled receptor signaling pathway	73/3819	157/6807	1	No	No
GO:0043153	Biological Process	p	entrainment of circadian clock by photoperiod	0/3819	5/6807	1	No	No
GO:1902299	Biological Process	p	pre-replicative complex assembly involved in cell cycle DNA replication	0/3819	5/6807	1	No	No
GO:0031076	Biological Process	p	embryonic camera-type eye development	0/3819	5/6807	1	No	No
GO:0001658	Biological Process	p	branching involved in ureteric bud morphogenesis	0/3819	5/6807	1	No	No
GO:0040016	Biological Process	p	embryonic cleavage	0/3819	5/6807	1	No	No
GO:0044331	Biological Process	p	cell-cell adhesion mediated by cadherin	0/3819	5/6807	1	No	No
GO:0048562	Biological Process	p	embryonic organ morphogenesis	0/3819	5/6807	1	No	No
GO:0010721	Biological Process	p	negative regulation of cell development	0/3819	5/6807	1	No	No
GO:0006493	Biological Process	p	protein O-linked glycosylation	0/3819	5/6807	1	No	No
GO:0022405	Biological Process	p	hair cycle process	0/3819	5/6807	1	No	No
GO:0051447	Biological Process	p	negative regulation of meiotic cell cycle	0/3819	5/6807	1	No	No
GO:0051961	Biological Process	p	negative regulation of nervous system development	0/3819	5/6807	1	No	No
GO:0006334	Biological Process	p	nucleosome assembly	5/3819	18/6807	1	No	No
GO:0007156	Biological Process	p	homophilic cell adhesion via plasma membrane adhesion molecules	24/3819	59/6807	1	No	No
GO:0007219	Biological Process	p	Notch signaling pathway	7/3819	23/6807	1	No	No
GO:0045214	Biological Process	p	sarcomere organization	4/3819	16/6807	1	No	No
GO:0006357	Biological Process	p	regulation of transcription from RNA polymerase II promoter	92/3819	192/6807	1	No	No
GO:0007017	Biological Process	p	microtubule-based process	52/3819	115/6807	1	No	No
GO:0006182	Biological Process	p	cGMP biosynthetic process	3/3819	13/6807	1	No	No
GO:0045475	Biological Process	p	locomotor rhythm	3/3819	13/6807	1	No	No
GO:0000086	Biological Process	p	G2/M transition of mitotic cell cycle	3/3819	13/6807	1	No	No
GO:0045995	Biological Process	p	regulation of embryonic development	3/3819	13/6807	1	No	No
GO:0048568	Biological Process	p	embryonic organ development	6/3819	20/6807	1	No	No
GO:0048793	Biological Process	p	pronephros development	1/3819	8/6807	1	No	No
GO:0043010	Biological Process	p	camera-type eye development	1/3819	8/6807	1	No	No
GO:0006828	Biological Process	p	manganese ion transport	1/3819	8/6807	1	No	No
GO:0045921	Biological Process	p	positive regulation of exocytosis	1/3819	8/6807	1	No	No
GO:0060976	Biological Process	p	coronary vasculature development	1/3819	8/6807	1	No	No
GO:0051960	Biological Process	p	regulation of nervous system development	1/3819	8/6807	1	No	No
GO:0007606	Biological Process	p	sensory perception of chemical stimulus	1/3819	8/6807	1	No	No
GO:0030534	Biological Process	p	adult behavior	2/3819	10/6807	1	No	No
GO:0019953	Biological Process	p	sexual reproduction	2/3819	10/6807	1	No	No
GO:0007131	Biological Process	p	reciprocal meiotic recombination	2/3819	10/6807	1	No	No
GO:0007212	Biological Process	p	dopamine receptor signaling pathway	2/3819	10/6807	1	No	No
GO:0060294	Biological Process	p	cilium movement involved in cell motility	5/3819	17/6807	1	No	No
GO:0006367	Biological Process	p	transcription initiation from RNA polymerase II promoter	9/3819	26/6807	1	No	No
GO:0045892	Biological Process	p	negative regulation of transcription, DNA-templated	27/3819	64/6807	1	No	No
GO:0007605	Biological Process	p	sensory perception of sound	15/3819	39/6807	1	No	No
GO:0007097	Biological Process	p	nuclear migration	10/3819	28/6807	1	No	No
GO:0043066	Biological Process	p	negative regulation of apoptotic process	22/3819	53/6807	1	No	No
GO:0035162	Biological Process	p	embryonic hemopoiesis	0/3819	4/6807	1	No	No
GO:2000312	Biological Process	p	regulation of kainate selective glutamate receptor activity	0/3819	4/6807	1	No	No
GO:0048644	Biological Process	p	muscle organ morphogenesis	0/3819	4/6807	1	No	No
GO:0046580	Biological Process	p	negative regulation of Ras protein signal transduction	0/3819	4/6807	1	No	No
GO:0006689	Biological Process	p	ganglioside catabolic process	0/3819	4/6807	1	No	No
GO:0044092	Biological Process	p	negative regulation of molecular function	0/3819	4/6807	1	No	No
GO:0055093	Biological Process	p	response to hyperoxia	0/3819	4/6807	1	No	No
GO:0045724	Biological Process	p	positive regulation of cilium assembly	0/3819	4/6807	1	No	No
GO:0048469	Biological Process	p	cell maturation	0/3819	4/6807	1	No	No
GO:2000179	Biological Process	p	positive regulation of neural precursor cell proliferation	0/3819	4/6807	1	No	No
GO:0009157	Biological Process	p	deoxyribonucleoside monophosphate biosynthetic process	0/3819	4/6807	1	No	No
GO:0007446	Biological Process	p	imaginal disc growth	0/3819	4/6807	1	No	No
GO:0040028	Biological Process	p	regulation of vulval development	0/3819	4/6807	1	No	No
GO:0008219	Biological Process	p	cell death	0/3819	4/6807	1	No	No
GO:0035641	Biological Process	p	locomotory exploration behavior	0/3819	4/6807	1	No	No
GO:0048265	Biological Process	p	response to pain	0/3819	4/6807	1	No	No
GO:0010940	Biological Process	p	positive regulation of necrotic cell death	0/3819	4/6807	1	No	No
GO:0030334	Biological Process	p	regulation of cell migration	8/3819	24/6807	1	No	No
GO:0001525	Biological Process	p	angiogenesis	6/3819	19/6807	1	No	No
GO:0006928	Biological Process	p	movement of cell or subcellular component	19/3819	47/6807	1	No	No
GO:0001843	Biological Process	p	neural tube closure	3/3819	12/6807	1	No	No
GO:0030307	Biological Process	p	positive regulation of cell growth	3/3819	12/6807	1	No	No
GO:0022412	Biological Process	p	cellular process involved in reproduction in multicellular organism	3/3819	12/6807	1	No	No
GO:0009653	Biological Process	p	anatomical structure morphogenesis	11/3819	30/6807	1	No	No
GO:0006935	Biological Process	p	chemotaxis	14/3819	36/6807	1	No	No
GO:0015074	Biological Process	p	DNA integration	17/3819	42/6807	1	No	No
GO:0072659	Biological Process	p	protein localization to plasma membrane	7/3819	21/6807	1	No	No
GO:0016477	Biological Process	p	cell migration	12/3819	32/6807	1	No	No
GO:0006885	Biological Process	p	regulation of pH	2/3819	9/6807	1	No	No
GO:0048667	Biological Process	p	cell morphogenesis involved in neuron differentiation	2/3819	9/6807	1	No	No
GO:0042026	Biological Process	p	protein refolding	2/3819	9/6807	1	No	No
GO:0008049	Biological Process	p	male courtship behavior	2/3819	9/6807	1	No	No
GO:0034620	Biological Process	p	cellular response to unfolded protein	2/3819	9/6807	1	No	No
GO:0040040	Biological Process	p	thermosensory behavior	2/3819	9/6807	1	No	No
GO:0031346	Biological Process	p	positive regulation of cell projection organization	2/3819	9/6807	1	No	No
GO:0050877	Biological Process	p	neurological system process	1/3819	7/6807	1	No	No
GO:0046928	Biological Process	p	regulation of neurotransmitter secretion	1/3819	7/6807	1	No	No
GO:0043523	Biological Process	p	regulation of neuron apoptotic process	1/3819	7/6807	1	No	No
GO:0021670	Biological Process	p	lateral ventricle development	1/3819	7/6807	1	No	No
GO:0008544	Biological Process	p	epidermis development	1/3819	7/6807	1	No	No
GO:0048311	Biological Process	p	mitochondrion distribution	1/3819	7/6807	1	No	No
GO:0035721	Biological Process	p	intraciliary retrograde transport	1/3819	7/6807	1	No	No
GO:0015935	Cellular component	e	small ribosomal subunit	14/3819	16/6807	1	No	No
GO:0017101	Cellular component	e	aminoacyl-tRNA synthetase multienzyme complex	8/3819	8/6807	1	No	No
GO:0016592	Cellular component	e	mediator complex	23/3819	29/6807	1	No	No
GO:0016282	Cellular component	e	eukaryotic 43S preinitiation complex	11/3819	12/6807	1	No	No
GO:0005680	Cellular component	e	anaphase-promoting complex	11/3819	12/6807	1	No	No
GO:0000779	Cellular component	e	condensed chromosome, centromeric region	7/3819	7/6807	1	No	No
GO:0005688	Cellular component	e	U6 snRNP	7/3819	7/6807	1	No	No
GO:0031248	Cellular component	e	protein acetyltransferase complex	7/3819	7/6807	1	No	No
GO:0005839	Cellular component	e	proteasome core complex	7/3819	7/6807	1	No	No
GO:0098852	Cellular component	e	lytic vacuole membrane	7/3819	7/6807	1	No	No
GO:0043231	Cellular component	e	intracellular membrane-bounded organelle	71/3819	106/6807	1	No	No
GO:0005635	Cellular component	e	nuclear envelope	23/3819	30/6807	1	No	No
GO:0033290	Cellular component	e	eukaryotic 48S preinitiation complex	10/3819	11/6807	1	No	No
GO:0005852	Cellular component	e	eukaryotic translation initiation factor 3 complex	12/3819	14/6807	1	No	No
GO:0000502	Cellular component	e	proteasome complex	24/3819	32/6807	1	No	No
GO:0032040	Cellular component	e	small-subunit processome	18/3819	23/6807	1	No	No
GO:0034719	Cellular component	e	SMN-Sm protein complex	6/3819	6/6807	1	No	No
GO:0008250	Cellular component	e	oligosaccharyltransferase complex	6/3819	6/6807	1	No	No
GO:0030131	Cellular component	e	clathrin adaptor complex	6/3819	6/6807	1	No	No
GO:0005682	Cellular component	e	U5 snRNP	6/3819	6/6807	1	No	No
GO:0000776	Cellular component	e	kinetochore	16/3819	20/6807	1	No	No
GO:0098588	Cellular component	e	bounding membrane of organelle	39/3819	56/6807	1	No	No
GO:0005581	Cellular component	e	collagen trimer	13/3819	16/6807	1	No	No
GO:0012505	Cellular component	e	endomembrane system	52/3819	77/6807	1	No	No
GO:0005911	Cellular component	p	cell-cell junction	10/3819	30/6807	1	No	No
GO:0034464	Cellular component	p	BBSome	0/3819	5/6807	1	No	No
GO:0031904	Cellular component	p	endosome lumen	0/3819	5/6807	1	No	No
GO:0043679	Cellular component	p	axon terminus	0/3819	5/6807	1	No	No
GO:0008076	Cellular component	p	voltage-gated potassium channel complex	5/3819	18/6807	1	No	No
GO:0005819	Cellular component	p	spindle	11/3819	32/6807	1	No	No
GO:0072357	Cellular component	p	PTW/PP1 phosphatase complex	3/3819	13/6807	1	No	No
GO:0000786	Cellular component	p	nucleosome	10/3819	29/6807	1	No	No
GO:0015630	Cellular component	p	microtubule cytoskeleton	8/3819	25/6807	1	No	No
GO:0097542	Cellular component	p	ciliary tip	1/3819	8/6807	1	No	No
GO:0044297	Cellular component	p	cell body	7/3819	22/6807	1	No	No
GO:0045177	Cellular component	p	apical part of cell	12/3819	33/6807	1	No	No
GO:0005903	Cellular component	p	brush border	4/3819	15/6807	1	No	No
GO:0016010	Cellular component	p	dystrophin-associated glycoprotein complex	0/3819	4/6807	1	No	No
GO:0032809	Cellular component	p	neuronal cell body membrane	0/3819	4/6807	1	No	No
GO:0097440	Cellular component	p	apical dendrite	0/3819	4/6807	1	No	No
GO:0008290	Cellular component	p	F-actin capping protein complex	0/3819	4/6807	1	No	No
GO:0045298	Cellular component	p	tubulin complex	0/3819	4/6807	1	No	No
GO:0043083	Cellular component	p	synaptic cleft	0/3819	4/6807	1	No	No
GO:0005775	Cellular component	p	vacuolar lumen	0/3819	4/6807	1	No	No
GO:0032838	Cellular component	p	cell projection cytoplasm	1/3819	7/6807	1	No	No
GO:0015035	Molecular Function	e	protein disulfide oxidoreductase activity	14/3819	16/6807	1	No	No
GO:0015095	Molecular Function	e	magnesium ion transmembrane transporter activity	8/3819	8/6807	1	No	No
GO:0051537	Molecular Function	e	2 iron, 2 sulfur cluster binding	17/3819	20/6807	1	No	No
GO:0051087	Molecular Function	e	chaperone binding	25/3819	32/6807	1	No	No
GO:0008080	Molecular Function	e	N-acetyltransferase activity	18/3819	22/6807	1	No	No
GO:0004298	Molecular Function	e	threonine-type endopeptidase activity	13/3819	15/6807	1	No	No
GO:0004540	Molecular Function	e	ribonuclease activity	7/3819	7/6807	1	No	No
GO:0048407	Molecular Function	e	platelet-derived growth factor binding	7/3819	7/6807	1	No	No
GO:0061608	Molecular Function	e	nuclear import signal receptor activity	7/3819	7/6807	1	No	No
GO:0051011	Molecular Function	e	microtubule minus-end binding	7/3819	7/6807	1	No	No
GO:0008320	Molecular Function	e	protein transmembrane transporter activity	7/3819	7/6807	1	No	No
GO:0016787	Molecular Function	e	hydrolase activity	100/3819	154/6807	1	No	No
GO:0005484	Molecular Function	e	SNAP receptor activity	15/3819	18/6807	1	No	No
GO:0003899	Molecular Function	e	DNA-directed RNA polymerase activity	21/3819	27/6807	1	No	No
GO:0015078	Molecular Function	e	hydrogen ion transmembrane transporter activity	18/3819	23/6807	1	No	No
GO:0070628	Molecular Function	e	proteasome binding	6/3819	6/6807	1	No	No
GO:0030971	Molecular Function	e	receptor tyrosine kinase binding	6/3819	6/6807	1	No	No
GO:0016779	Molecular Function	e	nucleotidyltransferase activity	16/3819	20/6807	1	No	No
GO:0005347	Molecular Function	e	ATP transmembrane transporter activity	23/3819	31/6807	1	No	No
GO:0004601	Molecular Function	e	peroxidase activity	11/3819	13/6807	1	No	No
GO:0001664	Molecular Function	p	G-protein coupled receptor binding	4/3819	17/6807	1	No	No
GO:0001217	Molecular Function	p	bacterial-type RNA polymerase transcriptional repressor activity, sequence-specific DNA binding	1/3819	9/6807	1	No	No
GO:0005249	Molecular Function	p	voltage-gated potassium channel activity	12/3819	34/6807	1	No	No
GO:0017075	Molecular Function	p	syntaxin-1 binding	0/3819	5/6807	1	No	No
GO:0071837	Molecular Function	p	HMG box domain binding	0/3819	5/6807	1	No	No
GO:0001228	Molecular Function	p	transcriptional activator activity, RNA polymerase II transcription regulatory region sequence-specific binding	7/3819	23/6807	1	No	No
GO:0003690	Molecular Function	p	double-stranded DNA binding	16/3819	42/6807	1	No	No
GO:0030165	Molecular Function	p	PDZ domain binding	4/3819	16/6807	1	No	No
GO:0004383	Molecular Function	p	guanylate cyclase activity	3/3819	13/6807	1	No	No
GO:0045504	Molecular Function	p	dynein heavy chain binding	3/3819	13/6807	1	No	No
GO:0097110	Molecular Function	p	scaffold protein binding	3/3819	13/6807	1	No	No
GO:0008083	Molecular Function	p	growth factor activity	1/3819	8/6807	1	No	No
GO:0001653	Molecular Function	p	peptide receptor activity	9/3819	26/6807	1	No	No
GO:0044877	Molecular Function	p	macromolecular complex binding	40/3819	90/6807	1	No	No
GO:0015108	Molecular Function	p	chloride transmembrane transporter activity	0/3819	4/6807	1	No	No
GO:0043208	Molecular Function	p	glycosphingolipid binding	0/3819	4/6807	1	No	No
GO:0004000	Molecular Function	p	adenosine deaminase activity	0/3819	4/6807	1	No	No
GO:0016286	Molecular Function	p	small conductance calcium-activated potassium channel activity	0/3819	4/6807	1	No	No
GO:0015930	Molecular Function	p	glutamate synthase activity	0/3819	4/6807	1	No	No
GO:0022839	Molecular Function	p	ion gated channel activity	0/3819	4/6807	1	No	No
GO:0004697	Molecular Function	p	protein kinase C activity	0/3819	4/6807	1	No	No
GO:0019136	Molecular Function	p	deoxynucleoside kinase activity	0/3819	4/6807	1	No	No
GO:0004190	Molecular Function	p	aspartic-type endopeptidase activity	16/3819	41/6807	1	No	No
GO:0030552	Molecular Function	p	cAMP binding	2/3819	9/6807	1	No	No
GO:0004712	Molecular Function	p	protein serine/threonine/tyrosine kinase activity	2/3819	9/6807	1	No	No
GO:0004879	Molecular Function	p	RNA polymerase II transcription factor activity, ligand-activated sequence-specific DNA binding	1/3819	7/6807	1	No	No
GO:0070740	Molecular Function	p	tubulin-glutamic acid ligase activity	1/3819	7/6807	1	No	No
GO:0015385	Molecular Function	p	sodium:proton antiporter activity	1/3819	7/6807	1	No	No
GO:0042578	Molecular Function	p	phosphoric ester hydrolase activity	1/3819	7/6807	1	No	No
