# Supplementary material for: In silico characterisation of the complete Ly6 protein family in Fasciola gigantica supported through transcriptomics of the newly-excysted juveniles
Source: Mol Omics. 2021 Nov 8;18(1):45–56. doi: 10.1039/d1mo00254f (PMC8763315; doi:10.1039/d1mo00254f)
Supplement: MO-018-D1MO00254F-s003 [file MO-018-D1MO00254F-s003.xlsx]

## Sheet: Sheet2
Rank	IPS Domain	#Seqs	Isotigs
1	(IPR002048) EF-hand domain	109	00028, 01578, 12591, 01579, 01576, 01577, 07711, 07710, 02420, 07037, 09336, 07441, 11655, 08250, 10044, 02418, 04839, 04838, 02811, 01723, 02417, 09054, 03188, 05244, 10711, 17507, 09605, 15604, 10274, 15320, 09040, 10826, 12729, 09564, 08468, 04152, 06573, 12447, 04153, 06572, 10703, 08196, 12168, 16763, 02809, 14186, 10818, 10939, 02357, 12719, 09432, 06321, 10137, 12430, 00282, 03316, 18493, …
2	(IPR000504) RNA recognition motif domain	102	09184, 08524, 05386, 08377, 12064, 12585, 18045, 05802, 11409, 10959, 04310, 05882, 09722, 14912, 10278, 11125, 00441, 03977, 05518, 04823, 05519, 03978, 09680, 03972, 04822, 04024, 04266, 08866, 14907, 03971, 09444, 04025, 04267, 07267, 11759, 14100, 13252, 13494, 01825, 01826, 01827, 11193, 03847, 03846, 02599, 08219, 08855, 00570, 00571, 08336, 00572, 14177, 01829, 10377, 11183, 09780, 03041, …
3	(IPR000719) Protein kinase domain	98	16151, 05019, 05018, 07168, 08256, 05020, 09217, 05021, 08650, 11770, 11532, 16784, 00136, 17075, 04313, 04676, 06852, 04312, 08763, 11525, 04282, 05093, 05092, 00021, 16654, 03698, 13934, 08990, 10945, 15679, 02517, 02518, 02516, 04379, 10936, 05348, 06797, 04378, 06796, 15302, 10494, 01708, 01709, 13884, 12398, 01897, 01898, 05578, 04243, 09664, 11733, 12306, 15938, 09659, 15935, 11174, 13197, …
4	(IPR017986) WD40-repeat-containing domain	73	10093, 03038, 03235, 08726, 01730, 07119, 09143, 07118, 04365, 09266, 04364, 04048, 09103, 09983, 04372, 08378, 09578, 08333, 09216, 04373, 10126, 10203, 08890, 04293, 10201, 01728, 10914, 03463, 08910, 04353, 04994, 05693, 04360, 04561, 11643, 04560, 05692, 14679, 09804, 12496, 12694, 10230, 01729, 11961, 10111, 10190, 04704, 02642, 02641, 10907, 04352, 09118, 11357, 10987, 09918, 14304, 18423, …
5	(IPR005225) Small GTP-binding protein domain	63	00247, 00248, 00249, 02548, 02549, 00243, 02542, 00244, 02543, 08209, 00245, 05534, 08923, 00246, 05535, 08845, 10849, 02142, 09069, 08721, 00242, 08453, 10245, 11013, 01963, 02139, 01961, 03986, 09099, 01962, 03985, 08515, 04431, 04430, 09213, 05960, 04042, 08322, 02140, 02141, 05492, 08360, 13104, 16572, 09160, 08509, 05356, 04584, 05121, 02250, 09316, 03729, 08816, 00255, 09593, 00250, 08217, …
6	(IPR001841) Zinc finger, RING-type	45	04406, 04628, 02109, 01597, 03037, 09681, 01598, 04305, 01599, 10508, 02120, 03111, 08646, 02121, 02122, 04488, 05970, 08743, 09536, 09438, 15456, 14029, 10586, 13030, 02119, 05846, 09174, 03964, 03963, 05302, 09355, 02155, 02156, 03450, 09888, 09505, 09923, 05030, 09209, 09606, 09608, 10053, 09928, 10073, 15542
7	(IPR013087) Zinc finger C2H2-type	44	01956, 01957, 01955, 07419, 04743, 07418, 08705, 04742, 08968, 04788, 05630, 08411, 09358, 13659, 10722, 14505, 14009, 10448, 10262, 16723, 11213, 15475, 17553, 13059, 17577, 17177, 09050, 00256, 05924, 09152, 09650, 08875, 09598, 10534, 11205, 10433, 08481, 12199, 10096, 01828, 10256, 10498, 10770, 10573
8	(IPR020683) Ankyrin repeat-containing domain	36	02520, 05415, 03895, 10807, 03897, 05414, 03892, 06269, 02143, 07798, 02144, 02145, 06268, 04151, 06376, 13997, 04150, 10845, 13132, 10145, 11014, 02638, 05728, 14041, 06377, 06782, 06783, 08761, 06044, 17228, 15842, 12494, 14055, 10156, 10110, 10353
9	(IPR013026) Tetratricopeptide repeat-containing domain	33	00324, 02405, 04529, 02406, 04528, 02741, 04688, 04500, 09483, 02742, 08603, 09289, 08455, 12625, 10865, 08772, 13613, 08551, 11853, 08770, 05580, 12121, 15232, 02613, 04414, 05543, 05542, 09995, 10556, 04462, 13420, 10530, 10033
10	(IPR001650) Helicase, C-terminal	32	03757, 03756, 03976, 03715, 03714, 03975, 08208, 08667, 10524, 01381, 08530, 01382, 10767, 08470, 09819, 10264, 01644, 01645, 01646, 09252, 09176, 01383, 01384, 09058, 09135, 09531, 09568, 10319, 13649, 14596, 11068, 11343
11	(IPR008139) Saposin B type domain	31	00269, 00325, 00287, 02421, 02422, 02423, 00268, 02424, 09023, 00283, 04981, 01296, 04980, 08348, 00285, 01297, 01298, 00270, 00271, 15257, 00298, 01684, 01685, 01686, 00279, 01687, 00272, 00294, 00273, 00275, 00282
12	(IPR000477) Reverse transcriptase domain	30	00944, 00945, 00946, 00947, 01019, 16051, 06665, 06664, 16406, 14741, 12583, 13699, 14960, 01028, 10280, 01025, 10719, 01026, 01027, 06712, 06998, 01020, 01021, 13845, 13222, 13563, 16657, 16696, 17069, 17346
13	(IPR000608) Ubiquitin-conjugating enzyme E2	29	00526, 01638, 01639, 08908, 00525, 03694, 08227, 02089, 08225, 05441, 09933, 10923, 02091, 10300, 10088, 12563, 16020, 03427, 01640, 09394, 12939, 06016, 06017, 09696, 04037, 09356, 04036, 10714, 16752
14	(IPR001452) SH3 domain	29	14296, 03759, 10070, 13021, 09462, 02720, 03496, 06762, 06763, 08351, 09979, 10024, 02718, 15230, 04438, 05307, 05448, 03169, 05306, 05449, 09296, 05686, 05687, 04598, 09701, 11621, 07770, 10954, 03170
15	(IPR014001) Helicase superfamily 1/2, ATP-binding domain	29	03614, 03757, 03756, 03976, 16292, 03715, 03975, 08208, 04620, 12768, 01381, 08530, 01382, 13519, 10767, 08470, 11670, 09819, 11113, 00258, 01644, 01645, 01646, 01383, 01384, 09058, 09531, 09827, 11068
16	(IPR017452) GPCR, rhodopsin-like, 7TM	28	01932, 01933, 04222, 04223, 09711, 10744, 05042, 10620, 10664, 05043, 07044, 12127, 09714, 17278, 04736, 04737, 06614, 08979, 05589, 15908, 03470, 12658, 09624, 12215, 13729, 05591, 14737, 12275
17	(IPR001781) Zinc finger, LIM-type	28	09081, 01116, 01114, 01115, 04343, 04342, 02981, 01111, 02980, 04297, 04296, 09735, 08370, 12320, 11630, 03109, 09011, 02395, 03760, 08316, 02396, 03761, 04163, 08444, 08664, 04187, 04186, 13445
18	(IPR001623) DnaJ domain	28	08907, 12690, 03217, 05934, 04501, 06603, 06602, 01691, 01692, 04463, 02273, 04450, 08452, 12846, 11077, 10580, 10168, 13115, 03108, 11370, 09232, 09277, 09695, 04462, 01690, 10857, 07095, 07094
19	(IPR004088) K Homology domain, type 1	27	00566, 00567, 00568, 00569, 00562, 00563, 00564, 00565, 00560, 00561, 04192, 12967, 10881, 17038, 00559, 02959, 00555, 00556, 00557, 04958, 00558, 10578, 08341, 08385, 11880, 17306, 17148
20	(IPR001478) PDZ domain	26	09880, 04684, 03055, 08744, 04103, 04685, 08194, 00175, 04909, 04908, 04619, 04618, 07808, 04336, 10619, 08956, 04337, 08712, 05322, 04163, 12536, 04484, 11143, 16833, 10693, 10430
21	(IPR007110) Immunoglobulin-like domain	26	00865, 00866, 05776, 07116, 05178, 03970, 05179, 11613, 11691, 03969, 00875, 08719, 07428, 09275, 10915, 01660, 09797, 10873, 10715, 08086, 00381, 17725, 14991, 15343, 16971, 12772
22	(IPR000859) CUB domain	25	02529, 00749, 00025, 12291, 08604, 02342, 02343, 04031, 09798, 16843, 00757, 00758, 00753, 00754, 00755, 00756, 00750, 00751, 00752, 06442, 01370, 01371, 14057, 12230, 15221
23	(IPR004045) Glutathione S-transferase, N-terminal	24	00119, 01659, 04409, 01655, 00116, 01656, 01657, 01658, 00112, 00123, 00113, 00124, 01654, 05101, 11458, 05100, 08651, 10895, 09504, 11622, 10825, 16655, 11470, 17743
24	(IPR000668) Peptidase C1A, papain C-terminal	23	00979, 01920, 12293, 00023, 09284, 00981, 09010, 08526, 08889, 09497, 03052, 13603, 03054, 16929, 03053, 11903, 11958, 14968, 10175, 01917, 12686, 01918, 01919
25	(IPR000626) Ubiquitin-like domain	22	03426, 14086, 03968, 03428, 03967, 02285, 02286, 02287, 02288, 12207, 14628, 11778, 11910, 02283, 12711, 02284, 10456, 12717, 08494, 11362, 13226, 12255
26	(IPR011545) DEAD/DEAH box helicase domain	21	00258, 01644, 03757, 01645, 03756, 03976, 01646, 04621, 03975, 08208, 01383, 01384, 09531, 04620, 01381, 08530, 01382, 15946, 08470, 09819, 11113
27	(IPR032071) Domain of unknown function DUF4806	21	00166, 01046, 01266, 01047, 01267, 01048, 01268, 00162, 00185, 01043, 00164, 00186, 01044, 00165, 01045, 05286, 00181, 01270, 00182, 01271, 01272
28	(IPR004843) Calcineurin-like phosphoesterase domain, ApaH type	21	02848, 02938, 02849, 09053, 08649, 04767, 16190, 04766, 04145, 04144, 04287, 05057, 09127, 05056, 08267, 13823, 04286, 08582, 02939, 10033, 10583
29	(IPR014044) CAP domain	21	01538, 01539, 01545, 02965, 01546, 01541, 01542, 01543, 01544, 01540, 05198, 05199, 10975, 10345, 10741, 12710, 15757, 05162, 08560, 10581, 12265
30	(IPR003959) ATPase, AAA-type, core	20	08939, 04309, 04308, 05305, 09064, 05304, 11718, 04244, 02100, 03146, 02101, 04245, 09467, 08840, 08982, 05670, 08275, 09914, 08390, 11321
31	(IPR000717) Proteasome component (PCI) domain	20	04639, 04638, 08926, 04589, 04588, 05108, 01620, 02159, 03876, 04800, 08934, 01621, 03875, 04496, 06138, 09411, 09741, 02160, 08553, 12059
32	(IPR001715) Calponin homology domain	18	16001, 04402, 03006, 04403, 04794, 08228, 04785, 04796, 09136, 04784, 04795, 06059, 10029, 12996, 10626, 00461, 12312, 15695
33	(IPR010987) Glutathione S-transferase, C-terminal-like	18	01659, 04409, 01655, 01656, 01657, 01658, 01654, 05101, 11458, 05100, 08651, 10895, 09504, 11248, 11622, 10825, 13122, 11470
34	(IPR013766) Thioredoxin domain	18	04758, 11491, 03945, 04759, 02388, 03368, 08704, 05898, 07558, 06951, 02385, 02386, 02387, 06950, 06484, 12633, 08471, 12135
35	(IPR013098) Immunoglobulin I-set	18	03969, 15450, 00875, 00865, 00866, 06307, 07428, 05776, 17093, 10915, 07116, 03970, 07582, 00381, 17725, 15343, 16971, 12772
36	(IPR000008) C2 domain	18	14080, 08937, 08617, 12907, 08457, 09774, 08313, 03073, 08850, 09414, 10623, 05460, 10554, 08187, 03072, 13528, 15159, 11531
37	(IPR004046) Glutathione S-transferase, C-terminal	17	01659, 04409, 01655, 01656, 01657, 01658, 01654, 05101, 11458, 05100, 08651, 10895, 11248, 11622, 10825, 13122, 11470
38	(IPR020846) Major facilitator superfamily domain	17	02972, 10817, 02971, 08207, 09034, 04299, 09159, 08730, 13208, 04990, 06176, 08760, 12418, 08260, 13079, 14238, 14477
39	(IPR000571) Zinc finger, CCCH-type	16	02976, 02124, 04457, 02125, 04456, 02974, 10959, 13939, 03342, 09640, 02123, 03343, 03041, 03040, 04494, 06390
40	(IPR000980) SH2 domain	16	02718, 02717, 05448, 08309, 03169, 08516, 02720, 05686, 05687, 10236, 08351, 04271, 10954, 03170, 04270, 02719
41	(IPR003439) ABC transporter-like	16	04808, 02657, 13020, 02659, 14393, 02658, 09032, 09440, 02660, 08623, 09146, 10555, 10559, 10074, 13468, 04809
42	(IPR004827) Basic-leucine zipper domain	16	01836, 02646, 02645, 01834, 02554, 02555, 09781, 09342, 01097, 04398, 01098, 01099, 01094, 01095, 01096, 10855
43	(IPR003961) Fibronectin type III	15	01758, 18453, 01757, 09242, 05794, 13933, 08684, 06382, 14747, 17839, 10150, 16288, 12883, 15256, 14740
44	(IPR006186) Serine/threonine-specific protein phosphatase/bis(5-nucleosyl)-tetraphosphatase	15	02938, 09053, 08649, 16190, 04145, 04144, 04287, 05057, 05056, 08267, 04286, 08582, 02939, 10033, 10583
45	(IPR001163) LSM domain, eukaryotic/archaea-type	15	14042, 17185, 02883, 02880, 05862, 02882, 02881, 13978, 14549, 07230, 13541, 15687, 16754, 13496, 15888
46	(IPR001849) Pleckstrin homology domain	15	01505, 06919, 01506, 01508, 06918, 16291, 01504, 08769, 06126, 08841, 10500, 03190, 08490, 16449, 16323
47	(IPR006195) Aminoacyl-tRNA synthetase, class II	15	00038, 02519, 01200, 05316, 05987, 06757, 01201, 05317, 01202, 05986, 06756, 09189, 08864, 12008, 10720
48	(IPR023796) Serpin domain	15	01255, 00013, 01256, 01257, 01258, 01251, 01252, 00010, 01253, 01254, 10752, 15318, 09419, 13155, 12362
49	(IPR000182) GNAT domain	15	13350, 14271, 05734, 05735, 05477, 05761, 05476, 09424, 14517, 05760, 10612, 03180, 11119, 13187, 11222
50	(IPR001584) Integrase, catalytic core	15	00867, 00878, 00868, 00879, 02502, 00600, 00601, 00876, 00602, 00877, 00881, 00880, 16819, 11064, 14678
51	(IPR001932) PPM-type phosphatase domain	15	14054, 04419, 13392, 04418, 02950, 02952, 02951, 09012, 03460, 08991, 10516, 05192, 08371, 10399, 11024
52	(IPR000727) Target SNARE coiled-coil homology domain	14	01824, 08909, 02629, 02631, 08815, 08527, 04473, 10004, 04472, 10966, 11098, 14297, 13247, 11354
53	(IPR000387) Tyrosine specific protein phosphatases domain	13	01516, 01514, 01515, 09153, 09197, 01434, 08525, 04493, 04492, 09612, 09319, 11197, 17435
54	(IPR001245) Serine-threonine/tyrosine-protein kinase, catalytic domain	13	07509, 07508, 04379, 04118, 06115, 04378, 05431, 09301, 07168, 11525, 07452, 10945, 13324
55	(IPR000195) Rab-GTPase-TBC domain	13	02217, 09380, 02218, 09590, 02219, 04204, 04412, 03122, 08930, 04196, 08521, 04197, 15227
56	(IPR003008) Tubulin/FtsZ, GTPase domain	13	00077, 08836, 08019, 09288, 03253, 08018, 04382, 05570, 05571, 08066, 08594, 11812, 15015
57	(IPR009071) High mobility group box domain	12	16262, 01748, 07585, 09997, 01749, 14426, 00210, 04999, 01750, 03214, 09818, 04998
58	(IPR008253) Marvel domain	12	00923, 00913, 00924, 08420, 00914, 00925, 10104, 12105, 08880, 00915, 00926, 00916
59	(IPR041569) AAA ATPase, AAA+ lid domain	12	08982, 08275, 08939, 04309, 04308, 08390, 05304, 04244, 02100, 02101, 04245, 09467
60	(IPR000795) Transcription factor, GTP-binding domain	12	06133, 05232, 06132, 01952, 10416, 00063, 01951, 10140, 02054, 17048, 02055, 09203
61	(IPR014014) RNA helicase, DEAD-box type, Q motif	12	00258, 01381, 08530, 01382, 03756, 03976, 15946, 08470, 08208, 01383, 01384, 04620
62	(IPR001214) SET domain	12	05650, 09865, 05361, 09845, 05360, 01641, 14310, 10172, 05136, 06346, 05137, 05651
63	(IPR018316) Tubulin/FtsZ, 2-layer sandwich domain	12	04382, 05570, 06395, 00078, 02987, 08594, 02986, 11812, 02988, 08836, 09288, 03253
64	(IPR039417) Papain-like cysteine endopeptidase	12	13603, 00979, 11903, 11958, 12293, 14968, 00023, 00981, 08526, 01917, 12686, 01919
65	(IPR001373) Cullin, N-terminal	12	06683, 02979, 03175, 15647, 02978, 02977, 08062, 08999, 03177, 03176, 07764, 14345
66	(IPR041588) Integrase zinc-binding domain	12	00867, 00878, 00868, 00879, 00199, 00830, 00831, 00876, 00877, 00881, 00829, 00880
67	(IPR000340) Dual specificity phosphatase, catalytic domain	11	01516, 04493, 04492, 09612, 08375, 01514, 01515, 11197, 09197, 08525, 17435
68	(IPR021712) Uncharacterised domain UPF0506	11	01677, 01002, 01003, 01674, 01004, 01675, 01676, 01285, 01000, 01286, 01320
69	(IPR000961) AGC-kinase, C-terminal	11	02517, 02518, 01904, 01897, 01898, 02516, 01905, 13688, 01708, 01709, 04312
70	(IPR000299) FERM domain	11	03384, 03383, 15077, 08352, 15958, 05438, 04129, 04128, 04860, 16564, 08226
71	(IPR002928) Myosin tail	11	12525, 08288, 02107, 02108, 11033, 14266, 08291, 04211, 16651, 04210, 04276
72	(IPR019787) Zinc finger, PHD-finger	11	03906, 04110, 16808, 15363, 11582, 15511, 11361, 05235, 01593, 03907, 05236
73	(IPR009038) GOLD domain	10	05144, 14956, 09937, 14150, 04569, 04568, 11141, 05059, 03101, 05058
74	(IPR004364) Aminoacyl-tRNA synthetase, class II (D/K/N)	10	00038, 17231, 01200, 05987, 01201, 16887, 01202, 05986, 09189, 08864
75	(IPR000994) Peptidase M24	10	05132, 05133, 00798, 12446, 02710, 02709, 03672, 04653, 04564, 04652
76	(IPR018979) FERM, N-terminal	10	03384, 03383, 15077, 08352, 15958, 05438, 04129, 04128, 16564, 08226
77	(IPR022775) AP complex, mu/sigma subunit	10	02817, 11489, 02816, 12479, 13308, 11162, 05587, 04741, 08369, 04740
78	(IPR001594) Palmitoyltransferase, DHHC domain	10	01470, 05815, 08561, 11638, 05814, 04512, 04513, 01471, 01472, 01473
79	(IPR015590) Aldehyde dehydrogenase domain	10	06167, 12611, 12519, 09281, 07690, 10778, 13271, 07832, 09574, 13588
80	(IPR001442) Collagen IV, non-collagenous	10	01778, 01779, 09728, 01783, 04446, 01784, 04447, 01780, 01781, 09675
81	(IPR023410) 14-3-3 domain	10	04509, 03837, 04508, 03273, 15405, 03836, 03774, 11256, 04056, 10990
82	(IPR007052) CS domain	9	01226, 01227, 01228, 01229, 09261, 08624, 10035, 06036, 05443
83	(IPR026590) Sirtuin family, catalytic core domain	9	05231, 03153, 05592, 03152, 05230, 05593, 03665, 03154, 10179
84	(IPR001609) Myosin head, motor domain	9	09215, 11469, 05082, 05083, 12868, 15137, 08291, 04276, 12234
85	(IPR013763) Cyclin-like	9	02350, 08232, 04191, 04874, 04190, 08417, 02351, 02352, 02353
86	(IPR001394) Peptidase C19, ubiquitin carboxyl-terminal hydrolase	9	09834, 03091, 05912, 05913, 03090, 08888, 06237, 10443, 04300
87	(IPR005821) Ion transport domain	9	10049, 12842, 04912, 03118, 04913, 07073, 05922, 03117, 11144
88	(IPR006634) TRAM/LAG1/CLN8 homology domain	9	08220, 08264, 09330, 08427, 03034, 03035, 05498, 08577, 14147
89	(IPR000086) NUDIX hydrolase domain	9	06288, 09748, 09805, 02940, 05500, 03696, 09004, 01672, 03695
90	(IPR019748) FERM central domain	9	03384, 03383, 08352, 08240, 05438, 04129, 04128, 04860, 08226
91	(IPR001107) Band 7 domain	9	05918, 05919, 10037, 10072, 14371, 04882, 09156, 12344, 17225
92	(IPR002068) Alpha crystallin/Hsp20 domain	9	08642, 09091, 00787, 04183, 04182, 03797, 08193, 00785, 12467
93	(IPR003891) Initiation factor eIF-4 gamma, MA3	8	01429, 09161, 01431, 01432, 09494, 01433, 08238, 01430
94	(IPR011598) Myc-type, basic helix-loop-helix (bHLH) domain	8	12834, 10292, 11515, 11647, 14051, 03744, 12751, 13730
95	(IPR022755) Zinc finger, double-stranded RNA binding	8	11338, 07198, 04813, 04812, 03345, 10498, 03344, 15884
96	(IPR034737) Translationally controlled tumour protein (TCTP) domain	8	01017, 01007, 01018, 01008, 01009, 01013, 01014, 01010
97	(IPR007123) Gelsolin-like domain	8	13966, 00168, 03687, 09340, 05215, 03952, 05214, 08214
98	(IPR000594) THIF-type NAD/FAD binding fold	8	09182, 11878, 03841, 03840, 18316, 09583, 08621, 09665
99	(IPR002073) 3'5'-cyclic nucleotide phosphodiesterase, catalytic domain	8	06595, 06594, 04835, 04834, 04536, 12395, 08191, 08610
100	(IPR001810) F-box domain	8	02969, 09502, 03337, 03237, 03336, 12510, 05662, 08710
101	(IPR006016) UspA	8	13557, 02756, 11825, 12935, 02757, 11659, 05976, 05977
102	(IPR006073) GTP binding domain	8	00137, 09941, 08277, 05480, 05812, 09364, 12411, 08731
103	(IPR013866) Sphingolipid delta4-desaturase, N-terminal	8	00933, 00934, 00930, 00931, 00932, 00927, 00928, 00929
104	(IPR001487) Bromodomain	8	09317, 10610, 04626, 04627, 05810, 09320, 08448, 10918
105	(IPR000836) Phosphoribosyltransferase domain	8	10952, 14438, 02546, 02547, 09638, 14889, 02545, 03001
106	(IPR005804) Fatty acid desaturase domain	8	00933, 00934, 00930, 00931, 00932, 00927, 00928, 00929
107	(IPR000326) Phosphatidic acid phosphatase type 2/haloperoxidase	8	05143, 14606, 09942, 05790, 05142, 05791, 07419, 10101
108	(IPR028889) Ubiquitin specific protease domain	8	09834, 05912, 05913, 03090, 08888, 06237, 10443, 04300
109	(IPR007125) Histone H2A/H2B/H3	8	14490, 14859, 06970, 12987, 15349, 09542, 12279, 15189
110	(IPR034113) Golgi-associated plant pathogenesis-related protein 1, SCP domain	8	05198, 05199, 10345, 10741, 02965, 05162, 08560, 12265
111	(IPR002130) Cyclophilin-type peptidyl-prolyl cis-trans isomerase domain	8	11349, 08372, 02476, 02473, 10377, 02474, 11287, 02475
112	(IPR013201) Cathepsin propeptide inhibitor domain (I29)	8	11777, 13603, 00979, 01920, 10504, 00981, 08526, 01918
113	(IPR003958) Transcription factor CBF/NF-Y/archaeal histone domain	7	12006, 02315, 10708, 02314, 14352, 13158, 06257
114	(IPR004839) Aminotransferase, class I/classII	7	09503, 12975, 09549, 10514, 14430, 12269, 08545
115	(IPR001148) Alpha carbonic anhydrase domain	7	02668, 02667, 17380, 11928, 15468, 02666, 02665
116	(IPR000198) Rho GTPase-activating protein domain	7	01192, 03096, 08187, 10390, 10538, 01191, 01199
117	(IPR001279) Metallo-beta-lactamase	7	15362, 02425, 02943, 09428, 02428, 10141, 16459
118	(IPR016158) Cullin homology domain	7	02979, 03175, 02978, 02977, 08999, 03176, 14345
119	(IPR005135) Endonuclease/exonuclease/phosphatase	7	09854, 04440, 11606, 14874, 06789, 04441, 12222
120	(IPR000569) HECT domain	7	09501, 09060, 11603, 06339, 09560, 02302, 08742
121	(IPR002939) Chaperone DnaJ, C-terminal	7	03218, 08907, 03217, 05934, 04635, 04634, 09232
122	(IPR002735) Translation initiation factor IF2/IF5	7	00016, 00017, 00078, 00079, 00015, 00075, 00076
123	(IPR006011) Syntaxin, N-terminal domain	7	15351, 02629, 02631, 08815, 06467, 13247, 11354
124	(IPR001763) Rhodanese-like domain	7	05619, 05618, 09182, 04968, 03771, 03773, 03772
125	(IPR037518) MPN domain	7	09754, 11533, 12953, 10478, 09220, 10002, 08568
126	(IPR031675) Serine-threonine protein phosphatase, N-terminal	7	05056, 04286, 08582, 04145, 04144, 04287, 05057
127	(IPR015940) Ubiquitin-associated domain	7	10832, 08919, 10923, 08494, 03968, 05924, 10020
128	(IPR000555) JAB1/MPN/MOV34 metalloenzyme domain	7	09754, 11533, 12953, 10478, 09220, 10002, 08568
129	(IPR001683) Phox homologous domain	7	02294, 02295, 09393, 16002, 02297, 11477, 02298
130	(IPR001164) Arf GTPase activating protein	7	08235, 04690, 12557, 06044, 05903, 05269, 08841
131	(IPR003533) Doublecortin domain	7	01402, 01403, 01404, 01405, 06736, 01400, 01401
132	(IPR000426) Proteasome alpha-subunit, N-terminal domain	7	03371, 13838, 03824, 05515, 05367, 05366, 10892
133	(IPR001236) Lactate/malate dehydrogenase, N-terminal	7	05350, 05351, 02669, 05966, 02671, 02670, 02672
134	(IPR022383) Lactate/malate dehydrogenase, C-terminal	7	05350, 02669, 05966, 02671, 02670, 02672, 05234
135	(IPR001254) Serine proteases, trypsin domain	7	05012, 03658, 03657, 03656, 08878, 05013, 11298
136	(IPR002108) Actin-depolymerising factor homology domain	7	01318, 01319, 12700, 05681, 01317, 08803, 00990
137	(IPR000873) AMP-dependent synthetase/ligase	6	08367, 08400, 09191, 04590, 12847, 00164
138	(IPR041489) PDZ domain 6	6	07808, 04336, 04337, 04909, 03055, 04908
139	(IPR008144) Guanylate kinase-like domain	6	08396, 04859, 04858, 06837, 10041, 10981
140	(IPR018485) Carbohydrate kinase, FGGY, C-terminal	6	10159, 16551, 02612, 02611, 02610, 02609
141	(IPR019749) Band 4.1 domain	6	03384, 03383, 05438, 04129, 04128, 08226
142	(IPR000467) G-patch domain	6	05968, 10361, 09014, 11331, 10012, 10661
143	(IPR020422) Dual specificity protein phosphatase domain	6	04493, 04492, 08375, 01514, 08525, 17435
144	(IPR005036) CBM21 (carbohydrate binding type-21) domain	6	02920, 05318, 05319, 01882, 10839, 01881
145	(IPR001247) Exoribonuclease, phosphorolytic domain 1	6	03838, 03839, 04738, 03139, 07633, 07632
146	(IPR023210) NADP-dependent oxidoreductase domain	6	09149, 12348, 15099, 06162, 06163, 07050
147	(IPR002109) Glutaredoxin	6	11503, 08222, 00352, 02206, 11491, 02207
148	(IPR002223) Pancreatic trypsin inhibitor Kunitz domain	6	16924, 06072, 08817, 03346, 07736, 16852
149	(IPR001496) SOCS box domain	6	08694, 02014, 02015, 02016, 02017, 11224
150	(IPR000971) Globin	6	08593, 06214, 03330, 06215, 13566, 03487
151	(IPR032501) Proteasomal ATPase OB C-terminal domain	6	08982, 03148, 03147, 04244, 03146, 04245
152	(IPR008145) Guanylate kinase/L-type calcium channel beta subunit	6	08396, 04859, 04858, 06837, 10041, 10981
153	(IPR001357) BRCT domain	6	06184, 06528, 06529, 09570, 09124, 12366
154	(IPR003307) W2 domain	6	00016, 00984, 00017, 08607, 00015, 00983
155	(IPR041373) Reverse transcriptase, RNase H-like domain	6	02800, 02801, 11652, 12400, 15134, 12520
156	(IPR000866) Alkyl hydroperoxide reductase subunit C/ Thiol specific antioxidant	6	06484, 04758, 04759, 03368, 03369, 12135
157	(IPR000885) Fibrillar collagen, C-terminal	6	00334, 10615, 10021, 11462, 05587, 05586
158	(IPR001202) WW domain	6	13404, 10659, 17803, 09859, 01724, 12938
159	(IPR017898) Vacuolar protein sorting-associated, VPS28, N-terminal	5	00892, 00893, 00894, 00895, 00891
160	(IPR001876) Zinc finger, RanBP2-type	5	10599, 11759, 11520, 02253, 09971
161	(IPR009040) Ferritin-like diiron domain	5	11668, 05747, 02773, 05746, 02772
162	(IPR000058) Zinc finger, AN1-type	5	16608, 04294, 03643, 03644, 10591
163	(IPR001251) CRAL-TRIO lipid binding domain	5	03084, 10390, 10206, 11261, 10000
164	(IPR013057) Amino acid transporter, transmembrane domain	5	08265, 11095, 05017, 05016, 09478
165	(IPR004161) Translation elongation factor EFTu-like, domain 2	5	05232, 09657, 01952, 12044, 01951
166	(IPR000330) SNF2-related, N-terminal domain	5	12768, 13519, 09827, 11670, 16764
167	(IPR007502) Helicase-associated domain	5	09547, 14340, 00791, 14210, 08667
168	(IPR042855) v-SNARE, coiled-coil homology domain	5	09824, 04845, 08295, 04844, 08665
169	(IPR025304) ALIX V-shaped domain	5	03010, 09956, 14275, 03012, 03011
170	(IPR030379) Septin-type guanine nucleotide-binding (G) domain	5	13758, 09071, 09094, 11999, 10398
171	(IPR024084) Isopropylmalate dehydrogenase-like domain	5	08785, 06909, 08839, 08822, 08303
172	(IPR006202) Neurotransmitter-gated ion-channel ligand-binding domain	5	01923, 01924, 11842, 18080, 16178
173	(IPR000690) Matrin/U1-C, C2H2-type zinc finger	5	11338, 13821, 01724, 13054, 08820
174	(IPR001222) Zinc finger, TFIIS-type	5	07135, 07134, 13362, 13764, 04510
175	(IPR001300) Peptidase C2, calpain, catalytic domain	5	04152, 07025, 07024, 04153, 14183
176	(IPR021790) PTBP1, RNA recognition motif 2-like	5	08377, 01633, 01634, 01635, 01632
177	(IPR001567) Peptidase M3A/M3B catalytic domain	5	06992, 09391, 02168, 09241, 02167
178	(IPR000261) EH domain	5	06151, 01723, 08284, 06150, 09718
179	(IPR000999) Ribonuclease III domain	5	03785, 06489, 03784, 13521, 03783
180	(IPR015415) Vps4 oligomerisation, C-terminal	5	04309, 04308, 05304, 02100, 02101
181	(IPR011764) Biotin carboxylation domain	5	03272, 03271, 08210, 07567, 07566
182	(IPR017899) Vacuolar protein sorting-associated, VPS28, C-terminal	5	00892, 00893, 00894, 00895, 00891
183	(IPR000891) Pyruvate carboxyltransferase	5	02635, 02634, 02636, 02633, 04155
184	(IPR028565) Mu homology domain	5	08586, 04633, 04632, 06657, 08369
185	(IPR000089) Biotin/lipoyl attachment	5	08487, 04154, 08210, 10680, 04786
186	(IPR015413) Methionyl/Leucyl tRNA synthetase	5	17040, 09939, 07985, 11059, 07984
187	(IPR040637) 60S ribosomal protein L10P, insertion domain	5	00019, 04233, 00020, 00021, 00022
188	(IPR008331) Ferritin/DPS protein domain	5	11668, 05747, 02773, 05746, 02772
189	(IPR013155) Methionyl/Valyl/Leucyl/Isoleucyl-tRNA synthetase, anticodon-binding	5	09939, 04855, 04854, 15024, 14246
190	(IPR000845) Nucleoside phosphorylase domain	5	06121, 09292, 03357, 03356, 05458
191	(IPR000595) Cyclic nucleotide-binding domain	5	08480, 04134, 12797, 06014, 04135
192	(IPR004274) FCP1 homology domain	5	13064, 03973, 03974, 14385, 08920
193	(IPR029489) O-GlcNAc transferase, C-terminal	5	02616, 02613, 07273, 02615, 02614
194	(IPR013520) Exonuclease, RNase T/DNA polymerase III	5	04000, 06065, 02623, 02621, 11540
195	(IPR001375) Peptidase S9, prolyl oligopeptidase, catalytic domain	5	11547, 09490, 10867, 04646, 09298
196	(IPR002687) Nop domain	5	11029, 09801, 10517, 04435, 04434
197	(IPR006671) Cyclin, N-terminal	5	02350, 04874, 08417, 02351, 02353
198	(IPR012599) Peptidase C1A, propeptide	5	16929, 09284, 09010, 10175, 08889
199	(IPR004160) Translation elongation factor EFTu/EF1A, C-terminal	5	05232, 02058, 12044, 02055, 09203
200	(IPR041679) DNA2/NAM7 helicase-like, AAA domain	5	03526, 03528, 06128, 11036, 17058
201	(IPR002589) Macro domain	5	11877, 02723, 02722, 02724, 02721
202	(IPR002913) START domain	5	04937, 08255, 04716, 04936, 10958
203	(IPR002553) Clathrin/coatomer adaptor, adaptin-like, N-terminal	5	15409, 01453, 03881, 03880, 10177
204	(IPR031167) OBG-type guanine nucleotide-binding (G) domain	4	08277, 05812, 09364, 08731
205	(IPR007109) Brix domain	4	10528, 04877, 04876, 10663
206	(IPR017455) Zinc finger, FYVE-related	4	13031, 05030, 10845, 03782
207	(IPR005142) eRF1 domain 3	4	01066, 04543, 01067, 04542
208	(IPR027791) Galactosyltransferase, C-terminal	4	05096, 01112, 04327, 04117
209	(IPR013748) Replication factor C, C-terminal	4	04555, 04554, 05486, 05487
210	(IPR004038) Ribosomal protein L7Ae/L30e/S12e/Gadd45	4	07035, 07034, 12691, 14744
211	(IPR023631) Amidase signature domain	4	09920, 04821, 10794, 15331
212	(IPR002125) Cytidine and deoxycytidylate deaminase domain	4	13889, 11926, 11697, 10034
213	(IPR002717) Histone acetyltransferase domain, MYST-type	4	11083, 09571, 05401, 06026
214	(IPR010908) Longin domain	4	09824, 08295, 05105, 05104
215	(IPR001433) Oxidoreductase FAD/NAD(P)-binding	4	11588, 09559, 06113, 15235
216	(IPR000210) BTB/POZ domain	4	08354, 14207, 05424, 11288
217	(IPR019956) Ubiquitin domain	4	12207, 14628, 11910, 12717
218	(IPR007856) Saposin-like type B, region 1	4	01296, 08348, 01297, 01298
219	(IPR032454) Histone H2A, C-terminal domain	4	14490, 06970, 09542, 12279
220	(IPR013216) Methyltransferase type 11	4	11775, 04886, 04887, 05652
221	(IPR018222) Nuclear transport factor 2, eukaryote	4	11407, 02930, 02929, 14808
222	(IPR035078) Phosphoenolpyruvate carboxykinase, GTP-utilising, N-terminal	4	01824, 01821, 01822, 01819
223	(IPR027486) Ribosomal protein S10 domain	4	03115, 03114, 06722, 14777
224	(IPR000194) ATPase, F1/V1/A1 complex, alpha/beta subunit, nucleotide-binding domain	4	08992, 08473, 02105, 07653
225	(IPR002075) Nuclear transport factor 2	4	11407, 02930, 02929, 14808
226	(IPR001565) Synaptotagmin	4	08850, 09414, 11531, 08313
227	(IPR000010) Cystatin domain	4	03962, 03961, 08404, 16268
228	(IPR000644) CBS domain	4	14602, 04464, 11378, 04465
229	(IPR002478) PUA domain	4	11985, 03844, 03843, 08830
230	(IPR002645) STAS domain	4	06494, 13919, 04288, 04289
231	(IPR012990) Sec23/Sec24 beta-sandwich	4	03687, 03686, 03688, 08214
232	(IPR000640) Elongation factor EFG, domain V-like	4	09776, 10862, 01952, 01951
233	(IPR029485) Cationic amino acid transporter, C-terminal	4	08443, 13437, 04902, 12167
234	(IPR011709) Domain of unknown function DUF1605	4	11997, 09547, 00791, 08667
235	(IPR018980) FERM, C-terminal PH-like domain	4	08352, 04129, 04128, 08226
236	(IPR019479) Peroxiredoxin, C-terminal	4	06484, 04758, 04759, 12135
237	(IPR014023) Mononegavirales RNA-directed RNA polymerase catalytic domain	4	08242, 08942, 02909, 02908
238	(IPR015878) S-adenosyl-L-homocysteine hydrolase, NAD binding domain	4	08464, 04427, 08847, 04426
239	(IPR024964) CTLH/CRA C-terminal to LisH motif domain	4	04252, 16391, 10503, 08879
240	(IPR020058) Glutamyl/glutaminyl-tRNA synthetase, class Ib, catalytic domain	4	07155, 07154, 08393, 08943
241	(IPR002014) VHS domain	4	11546, 11171, 13031, 08140
242	(IPR001878) Zinc finger, CCHC-type	4	11084, 14013, 03342, 11443
243	(IPR035684) Arginyl-tRNA synthetase, catalytic core domain	4	03823, 03822, 03821, 12343
244	(IPR000242) PTP type protein phosphatase	4	15593, 09319, 09153, 01434
245	(IPR003395) RecF/RecN/SMC, N-terminal	4	06172, 10054, 01718, 01719
246	(IPR017923) Transcription factor IIS, N-terminal	4	02524, 11192, 11564, 04510
247	(IPR004148) BAR domain	4	09524, 04439, 04438, 09037
248	(IPR001012) UBX domain	4	05924, 08955, 02662, 02661
249	(IPR000306) FYVE zinc finger	4	13031, 05030, 10845, 04756
250	(IPR003594) Histidine kinase/HSP90-like ATPase	4	08861, 09096, 02115, 02116
251	(IPR024958) GRASP55/65 PDZ-like domain	4	07221, 02932, 02934, 02933
252	(IPR002219) Protein kinase C-like, phorbol ester/diacylglycerol-binding domain	4	12073, 04313, 09121, 04312
253	(IPR000095) CRIB domain	4	07278, 04705, 04704, 07279
254	(IPR002314) Aminoacyl-tRNA synthetase, class II (G/ P/ S/T)	4	02174, 10720, 05316, 05317
255	(IPR004217) Tim10-like	4	13691, 06855, 02243, 02244
256	(IPR000463) Cytosolic fatty-acid binding	4	13183, 13946, 13159, 13423
257	(IPR022682) Peptidase C2, calpain, large subunit, domain III	4	04152, 06760, 04153, 09384
258	(IPR005517) Translation elongation factor EFG/EF2, domain IV	4	09776, 10862, 01952, 01951
259	(IPR033464) CSN8/PSMD8/EIF3K	4	02160, 12374, 02159, 06138
260	(IPR002483) PWI domain	4	02151, 02152, 02153, 02154
261	(IPR041615) Desmoplakin, SH3 domain	4	01864, 01861, 01862, 01863
262	(IPR001005) SANT/Myb domain	4	08674, 04450, 13160, 12333
263	(IPR006137) NADH:ubiquinone oxidoreductase-like, 20kDa subunit	4	03412, 03411, 07930, 11686
264	(IPR009025) DNA-directed RNA polymerase, RBP11-like dimerisation domain	4	01604, 01605, 01600, 01603
265	(IPR000270) PB1 domain	4	03056, 03055, 14006, 03057
266	(IPR020454) Diacylglycerol/phorbol-ester binding	4	12073, 04313, 09121, 04312
267	(IPR003029) S1 domain	4	10501, 10940, 12648, 09057
268	(IPR003172) MD-2-related lipid-recognition domain	4	05371, 10968, 13472, 13544
269	(IPR003887) LEM domain	4	01219, 01223, 01224, 01225
270	(IPR024766) Zinc finger, RING-H2-type	4	01597, 01598, 01599, 08743
271	(IPR004192) Cytochrome b-c1 complex subunit Rieske, transmembrane domain	4	03290, 05798, 03289, 03288
272	(IPR014824) Scaffold protein Nfu/NifU, N-terminal	4	02680, 02679, 02678, 02677
273	(IPR001132) SMAD domain, Dwarfin-type	4	06719, 06718, 10933, 12298
274	(IPR016040) NAD(P)-binding domain	4	15022, 08572, 05455, 05454
275	(IPR006571) TLDc domain	4	01309, 01310, 15016, 10055
276	(IPR000953) Chromo/chromo shadow domain	4	03351, 03350, 13859, 10438
277	(IPR013979) Translation initiation factor, beta propellor-like domain	4	15033, 10284, 08989, 08910
278	(IPR001078) 2-oxoacid dehydrogenase acyltransferase, catalytic domain	4	08487, 04786, 09762, 00417
279	(IPR001075) NIF system FeS cluster assembly, NifU, C-terminal	4	02680, 02679, 02678, 02677
280	(IPR002126) Cadherin-like	4	13834, 14646, 02993, 02992
281	(IPR005141) eRF1 domain 2	4	01066, 04543, 01067, 04542
282	(IPR023780) Chromo domain	4	03351, 03350, 13859, 10438
283	(IPR004182) GRAM domain	4	15090, 02583, 02584, 02585
284	(IPR014730) Electron transfer flavoprotein, alpha/beta-subunit, N-terminal	4	02308, 02304, 09879, 02305
285	(IPR002867) IBR domain	4	10910, 09355, 10220, 06686
286	(IPR000253) Forkhead-associated (FHA) domain	4	03191, 09506, 04200, 04201
287	(IPR002319) Phenylalanyl-tRNA synthetase	4	12008, 09328, 06757, 06756
288	(IPR006680) Amidohydrolase-related	4	05980, 12090, 00288, 05981
289	(IPR009075) Acyl-CoA dehydrogenase/oxidase C-terminal	4	03514, 14658, 10194, 11147
290	(IPR003616) Post-SET domain	4	05650, 09845, 05360, 01641
291	(IPR012317) Poly(ADP-ribose) polymerase, catalytic domain	4	09930, 14860, 08995, 11574
292	(IPR000403) Phosphatidylinositol 3-/4-kinase, catalytic domain	4	08791, 01695, 01693, 01694
293	(IPR018957) Zinc finger, C3HC4 RING-type	4	03964, 03963, 02155, 02156
294	(IPR006629) LPS-induced tumour necrosis factor alpha factor	4	06362, 09280, 10805, 02530
295	(IPR007064) Nmd3, N-terminal	4	05419, 06292, 05418, 06293
296	(IPR022096) SBF1/SBF2 domain	4	01837, 10103, 01838, 01839
297	(IPR011765) Peptidase M16, N-terminal	4	08591, 08639, 04232, 12431
298	(IPR027995) Galactosyltransferase, N-terminal	4	05097, 05096, 04327, 04117
299	(IPR001578) Peptidase C12, ubiquitin carboxyl-terminal hydrolase	4	03107, 03106, 00361, 03105
300	(IPR012911) Protein serine/threonine phosphatase 2C, C-terminal	4	14054, 02950, 02952, 02951
301	(IPR000905) Gcp-like domain	3	06287, 06286, 09881
302	(IPR013809) ENTH domain	3	14516, 11578, 12022
303	(IPR004014) Cation-transporting P-type ATPase, N-terminal	3	13428, 14073, 09225
304	(IPR004095) TGS	3	04408, 05812, 08731
305	(IPR033911) Methioninyl-tRNA synthetase core domain	3	17040, 09939, 07984
306	(IPR001709) Flavoprotein pyridine nucleotide cytochrome reductase	3	11588, 09559, 15235
307	(IPR001607) Zinc finger, UBP-type	3	09308, 05767, 14220
308	(IPR014837) EF-hand, Ca insensitive	3	04130, 04131, 10044
309	(IPR032630) P-type ATPase, C-terminal	3	08608, 08415, 05772
310	(IPR000742) EGF-like domain	3	01248, 12284, 09476
311	(IPR023753) FAD/NAD(P)-binding domain	3	08222, 08252, 08315
312	(IPR029004) Ribosomal L28e/Mak16	3	06352, 01101, 01100
313	(IPR034211) PUF60, RNA recognition motif 2	3	01825, 01826, 08336
314	(IPR006097) Glutamate/phenylalanine/leucine/valine dehydrogenase, dimerisation domain	3	02927, 02926, 02928
315	(IPR005636) DTW	3	02072, 02070, 02069
316	(IPR032781) ABC-transporter extension domain	3	02657, 14393, 02658
317	(IPR006020) PTB/PI domain	3	11391, 04229, 03595
318	(IPR000418) Ets domain	3	09600, 09558, 09902
319	(IPR026541) MRG domain	3	02697, 13585, 12541
320	(IPR004012) RUN domain	3	13361, 08571, 08512
321	(IPR000642) Peptidase M41	3	08275, 08390, 09467
322	(IPR000602) Glycoside hydrolase family 38, N-terminal domain	3	05657, 16910, 05656
323	(IPR009056) Cytochrome c-like domain	3	06772, 01744, 08823
324	(IPR017901) C-CAP/cofactor C-like domain	3	00445, 14021, 16900
325	(IPR004154) Anticodon-binding	3	02519, 10222, 12464
326	(IPR006096) Glutamate/phenylalanine/leucine/valine dehydrogenase, C-terminal	3	02927, 02926, 02928
327	(IPR034732) Extended PHD (ePHD) domain	3	16808, 10329, 15841
328	(IPR020575) Heat shock protein Hsp90, N-terminal	3	09096, 02115, 02116
329	(IPR033947) Electron transfer flavoprotein, alpha subunit, N-terminal	3	02308, 02304, 02305
330	(IPR012921) Spen paralogue and orthologue SPOC, C-terminal	3	09821, 03137, 03138
331	(IPR002638) Quinolinate phosphoribosyl transferase, C-terminal	3	03207, 03206, 03205
332	(IPR031162) CBP/p300-type histone acetyltransferase domain	3	07287, 07286, 12957
333	(IPR001104) 3-oxo-5-alpha-steroid 4-dehydrogenase, C-terminal	3	09000, 12830, 08986
334	(IPR019510) Protein kinase A anchor protein, nuclear localisation signal domain	3	05011, 12757, 05010
335	(IPR021151) GINS subunit, domain A	3	11104, 07743, 07742
336	(IPR006575) RWD domain	3	03381, 03380, 12444
337	(IPR010912) Spen paralogue/orthologue C-terminal, metazoa	3	09821, 03137, 03138
338	(IPR006977) Yip1 domain	3	10765, 09249, 09709
339	(IPR007120) DNA-directed RNA polymerase, subunit 2, hybrid-binding domain	3	11956, 12817, 08797
340	(IPR013094) Alpha/beta hydrolase fold-3	3	04592, 04593, 09862
341	(IPR007081) RNA polymerase Rpb1, domain 5	3	10621, 02931, 16215
342	(IPR006148) Glucosamine/galactosamine-6-phosphate isomerase	3	09437, 04765, 04764
343	(IPR000375) Dynamin central domain	3	15781, 07649, 07648
344	(IPR007863) Peptidase M16, C-terminal	3	08591, 08639, 04232
345	(IPR001870) B30.2/SPRY domain	3	10503, 04621, 04620
346	(IPR000156) Ran binding domain	3	00097, 10151, 05642
347	(IPR010357) Domain of unknown function DUF953, thioredoxin-like	3	04603, 11769, 13078
348	(IPR017896) 4Fe-4S ferredoxin-type, iron-sulphur binding domain	3	09952, 10279, 13468
349	(IPR011527) ABC transporter type 1, transmembrane domain	3	11558, 11148, 14498
350	(IPR000772) Ricin B, lectin domain	3	04261, 04260, 08293
351	(IPR001305) Heat shock protein DnaJ, cysteine-rich domain	3	08907, 04635, 04634
352	(IPR001173) Glycosyltransferase 2-like	3	06405, 08293, 06404
353	(IPR015927) Peptidase S24/S26A/S26B/S26C	3	03421, 09961, 03420
354	(IPR032629) Mon2, dimerisation and cyclophilin-binding domain	3	01666, 01667, 01668
355	(IPR006076) FAD dependent oxidoreductase	3	11726, 08915, 08538
356	(IPR001995) Peptidase A2A, retrovirus, catalytic	3	00826, 00827, 00828
357	(IPR006099) Methylmalonyl-CoA mutase, alpha/beta chain, catalytic	3	05583, 05582, 04179
358	(IPR002123) Phospholipid/glycerol acyltransferase	3	13319, 02675, 02676
359	(IPR006900) Sec23/Sec24, helical domain	3	03687, 03686, 08214
360	(IPR014830) Glycolipid transfer protein domain	3	01391, 15149, 09653
361	(IPR005843) Alpha-D-phosphohexomutase, C-terminal	3	04885, 04884, 08467
362	(IPR013272) Vps72/YL1, C-terminal	3	12416, 01738, 01739
363	(IPR001017) Dehydrogenase, E1 component	3	05060, 05061, 09211
364	(IPR041243) STI1 domain	3	08455, 04529, 04528
365	(IPR003010) Carbon-nitrogen hydrolase	3	13844, 08116, 08115
366	(IPR003034) SAP domain	3	02281, 08466, 04917
367	(IPR006595) CTLH, C-terminal LisH motif	3	16391, 10503, 08879
368	(IPR023341) MABP domain	3	04989, 14043, 04988
369	(IPR039542) Endoplasmic reticulum vesicle transporter, N-terminal	3	07821, 07820, 08678
370	(IPR001356) Homeobox domain	3	12705, 09791, 08427
371	(IPR040457) Gamma tubulin complex component, C-terminal	3	16284, 10400, 09095
372	(IPR020067) Frizzled domain	3	09932, 18042, 18555
373	(IPR001736) Phospholipase D/Transphosphatidylase	3	11446, 09670, 13632
374	(IPR029154) 3-hydroxyisobutyrate dehydrogenase, NAD-binding domain	3	04231, 04230, 16100
375	(IPR019559) Cullin protein, neddylation domain	3	03175, 02978, 02977
376	(IPR003165) Piwi domain	3	08595, 15847, 06446
377	(IPR001135) NADH-quinone oxidoreductase, subunit D	3	02355, 02356, 02354
378	(IPR000535) Major sperm protein (MSP) domain	3	06054, 06055, 03025
379	(IPR003131) Potassium channel tetramerisation-type BTB domain	3	08354, 15390, 08689
380	(IPR033922) NAD(P) binding domain of glutamate dehydrogenase	3	02927, 02926, 02928
381	(IPR002558) I/LWEQ domain	3	02061, 09943, 02059
382	(IPR003388) Reticulon	3	04005, 08615, 04004
383	(IPR005123) Oxoglutarate/iron-dependent dioxygenase	3	10738, 08843, 08578
384	(IPR001041) 2Fe-2S ferredoxin-type iron-sulfur binding domain	3	10279, 06063, 06062
385	(IPR011547) SLC26A/SulP transporter domain	3	13919, 04288, 04289
386	(IPR000257) Uroporphyrinogen decarboxylase (URO-D)	3	12997, 07007, 07006
387	(IPR003877) SPRY domain	3	10503, 04621, 04620
388	(IPR013149) Alcohol dehydrogenase, C-terminal	3	10469, 14187, 04970
389	(IPR033391) Fructose-1-6-bisphosphatase class I, N-terminal	3	17573, 04468, 04469
390	(IPR006816) ELMO domain	3	03140, 10631, 03141
391	(IPR006593) Cytochrome b561/ferric reductase transmembrane	3	12616, 04159, 04158
392	(IPR040598) UPF0113, pre-PUA domain	3	03845, 03844, 03843
393	(IPR006196) RNA-binding domain, S1, IF1 type	3	09484, 12570, 13004
394	(IPR023302) Peptidase S9A, N-terminal domain	3	07871, 07870, 11160
395	(IPR008905) Eukaryotic translation initiation factor 3 subunit C, N-terminal domain	3	01623, 01620, 01621
396	(IPR015404) Sorting nexin Vps5-like, C-terminal	3	02294, 02295, 02296
397	(IPR003613) U box domain	3	16052, 16684, 08787
398	(IPR003347) JmjC domain	3	09601, 07064, 07282
399	(IPR001079) Galectin, carbohydrate recognition domain	3	10007, 06515, 06514
400	(IPR005475) Transketolase-like, pyrimidine-binding domain	3	09193, 08324, 09302
401	(IPR022764) Peptidase S54, rhomboid domain	3	08432, 09538, 05838
402	(IPR007379) Tim44-like domain	3	04479, 04478, 08931
403	(IPR004365) OB-fold nucleic acid binding domain, AA-tRNA synthetase-type	3	01200, 01201, 01202
404	(IPR025258) Putative zinc-RING and/or ribbon	3	05694, 11859, 03007
405	(IPR023801) Histone deacetylase domain	3	03173, 03172, 08523
406	(IPR035077) Phosphoenolpyruvate carboxykinase, C-terminal P-loop domain	3	01821, 01822, 01819
407	(IPR005155) UPF0113, PUA domain	3	03845, 03844, 03843
408	(IPR024969) Rpn11/EIF3F, C-terminal	3	09220, 10002, 12555
409	(IPR006029) Neurotransmitter-gated ion-channel transmembrane domain	3	01923, 11842, 07627
410	(IPR002893) Zinc finger, MYND-type	3	16242, 14594, 04333
411	(IPR006630) La-type HTH domain	3	04732, 04521, 04520
412	(IPR007641) RNA polymerase Rpb2, domain 7	3	11956, 12817, 08797
413	(IPR006068) Cation-transporting P-type ATPase, C-terminal	3	08197, 09455, 12134
414	(IPR003103) BAG domain	3	11362, 09165, 12938
415	(IPR002641) Patatin-like phospholipase domain	3	09569, 06979, 06978
416	(IPR018967) Iron sulphur-containing domain, CDGSH-type	3	06816, 12294, 14857
417	(IPR005482) Biotin carboxylase, C-terminal	3	03272, 03271, 08210
418	(IPR004108) Iron hydrogenase, large subunit, C-terminal	3	10491, 06894, 06895
419	(IPR001750) NADH:quinone oxidoreductase/Mrp antiporter, membrane subunit	3	05677, 00635, 05676
420	(IPR006047) Glycosyl hydrolase, family 13, catalytic domain	3	02925, 02924, 08871
421	(IPR006656) Molybdopterin oxidoreductase	3	01060, 01061, 01059
422	(IPR030381) Dynamin-type guanine nucleotide-binding (G) domain	3	15781, 08284, 11330
423	(IPR003653) Ulp1 protease family, C-terminal catalytic domain	3	10972, 05877, 05876
424	(IPR041105) TAR DNA-binding protein 43, N-terminal	3	03977, 03978, 08219
425	(IPR002379) V-ATPase proteolipid subunit C-like domain	3	09954, 07635, 09663
426	(IPR005481) Biotin carboxylase-like, N-terminal domain	3	08210, 07567, 07566
427	(IPR014891) DWNN domain	3	07481, 07480, 06887
428	(IPR014720) Double-stranded RNA-binding domain	3	15225, 14244, 14444
429	(IPR006594) LIS1 homology motif	3	16391, 10503, 03594
430	(IPR002616) tRNA-guanine(15) transglycosylase-like	3	04262, 04263, 12088
431	(IPR011987) ATPase, V1 complex, subunit H, C-terminal	3	02983, 02985, 02984
432	(IPR006561) DZF domain	3	15818, 10877, 09790
433	(IPR021131) Ribosomal protein L18e/L15P	3	13746, 02240, 11138
434	(IPR034209) PUF60, RNA recognition motif 1	3	01825, 01826, 08336
435	(IPR024518) Domain of unknown function DUF3421	3	11868, 12331, 12497
436	(IPR002059) Cold-shock protein, DNA-binding	3	12844, 09366, 15961
437	(IPR016071) Staphylococcal nuclease (SNase-like), OB-fold	3	09644, 13772, 04148
438	(IPR030395) Glycerophosphodiester phosphodiesterase domain	2	08800, 06774
439	(IPR011629) Cobalamin (vitamin B12) biosynthesis CobW-like, C-terminal	2	04947, 04946
440	(IPR016137) RGS domain	2	07516, 11421
441	(IPR041995) Kin17, KOW domain	2	05376, 05377
442	(IPR027370) RING-type zinc-finger, LisH dimerisation motif	2	13030, 09928
443	(IPR010569) Myotubularin-like phosphatase domain	2	08278, 11281
444	(IPR003153) Adaptor protein Cbl, N-terminal helical	2	17530, 16988
445	(IPR006098) Methylmalonyl-CoA mutase, alpha chain, catalytic	2	05583, 05582
446	(IPR041997) Ribosomal Protein L6, KOW domain	2	11363, 04228
447	(IPR012988) Ribosomal protein L30, N-terminal	2	11140, 15761
448	(IPR010339) TIP49, P-loop domain	2	08813, 08786
449	(IPR018121) Seven-in-absentia protein, TRAF-like domain	2	04406, 04407
450	(IPR018497) Peptidase M13, C-terminal domain	2	09978, 15710
451	(IPR009269) NF-kappa-B-activating protein, C-terminal	2	01303, 01302
452	(IPR008251) Chromo shadow domain	2	13859, 10438
453	(IPR014775) L27 domain, C-terminal	2	14577, 10430
454	(IPR001309) Peptidase C14, p20 domain	2	10326, 15671
455	(IPR013154) Alcohol dehydrogenase, N-terminal	2	10469, 04971
456	(IPR006797) PRELI/MSF1 domain	2	09426, 08922
457	(IPR006108) 3-hydroxyacyl-CoA dehydrogenase, C-terminal	2	10455, 11685
458	(IPR008146) Glutamine synthetase, catalytic domain	2	08590, 08423
459	(IPR002871) NIF system FeS cluster assembly, NifU, N-terminal	2	16529, 10383
460	(IPR014929) E2 binding	2	05930, 05931
461	(IPR034261) CNOT4, RNA recognition motif	2	03041, 03040
462	(IPR022742) Serine aminopeptidase, S33	2	10148, 09321
463	(IPR034649) Hsp70-interacting protein, N-terminal	2	04529, 04528
464	(IPR002018) Carboxylesterase, type B	2	10601, 10645
465	(IPR004179) Sec63 domain	2	08452, 06711
466	(IPR003121) SWIB/MDM2 domain	2	03702, 03701
467	(IPR017905) ERV/ALR sulfhydryl oxidase domain	2	04728, 12378
468	(IPR025715) Chromatin target of PRMT1 protein, C-terminal	2	06144, 06145
469	(IPR029054) dUTPase-like	2	16778, 15167
470	(IPR022238) 18S rRNA (guanine(1575)-N(7))-methyltransferase Bud23, C-terminal	2	05653, 05652
471	(IPR024395) CLASP N-terminal domain	2	10821, 10521
472	(IPR039899) BET1, SNARE domain	2	10966, 14297
473	(IPR005811) ATP-citrate lyase/succinyl-CoA ligase	2	08558, 09552
474	(IPR001030) Aconitase/3-isopropylmalate dehydratase large subunit, alpha/beta/alpha domain	2	04347, 04346
475	(IPR024253) Phosducin, thioredoxin-like domain	2	11007, 09586
476	(IPR031662) GTP binding protein, second domain	2	05812, 08731
477	(IPR007862) Adenylate kinase, active site lid domain	2	10052, 09222
478	(IPR003117) cAMP-dependent protein kinase regulatory subunit, dimerization-anchoring domain	2	04134, 04135
479	(IPR021870) Major vault protein, shoulder domain	2	04714, 04715
480	(IPR025786) Mononegavirus L protein 2-O-ribose methyltransferase	2	08218, 08204
481	(IPR013810) Ribosomal protein S5, N-terminal	2	05904, 10706
482	(IPR029148) FACT complex subunit Spt16, N-terminal lobe domain	2	04653, 04652
483	(IPR016030) Cobalamin adenosyltransferase-like	2	03582, 13174
484	(IPR013937) Sorting nexin, C-terminal	2	11712, 14748
485	(IPR007042) SERRATE/Ars2 , C-terminal	2	00064, 08775
486	(IPR004331) SPX domain	2	16747, 02099
487	(IPR035808) Ribosomal protein L7, eukaryotic/archaeal	2	10943, 11140
488	(IPR013549) Domain of unknown function DUF1731	2	04721, 04720
489	(IPR011108) Zn-dependent metallo-hydrolase, RNA specificity domain	2	13944, 09453
490	(IPR003033) SCP2 sterol-binding domain	2	01356, 12016
491	(IPR005018) DOMON domain	2	04159, 04158
492	(IPR012989) SEP domain	2	02662, 02661
493	(IPR001374) R3H domain	2	04393, 04392
494	(IPR001660) Sterile alpha motif domain	2	13451, 06345
495	(IPR033704) dUTPase, trimeric	2	16778, 15167
496	(IPR007829) TM2 domain	2	10728, 11992
497	(IPR025777) GMP synthetase ATP pyrophosphatase domain	2	02190, 02192
498	(IPR003137) PA domain	2	05554, 05555
499	(IPR005140) eRF1 domain 1/Pelota-like	2	04543, 04542
500	(IPR020059) Glutamyl/glutaminyl-tRNA synthetase, class Ib, anti-codon binding domain	2	08393, 08943
501	(IPR002653) Zinc finger, A20-type	2	04294, 10591
502	(IPR001424) Superoxide dismutase, copper/zinc binding domain	2	00149, 12859
503	(IPR029346) Ubiquitin carboxyl-terminal hydrolase, C-terminal	2	05219, 05218
504	(IPR013746) Hydroxymethylglutaryl-coenzyme A synthase C-terminal domain	2	03738, 03740
505	(IPR033658) Glutaredoxin, PICOT-like	2	11503, 11491
506	(IPR005805) Rieske iron-sulphur protein, C-terminal	2	05798, 03288
507	(IPR013209) Lipin/Ned1/Smp2 (LNS2)	2	09767, 10637
508	(IPR002083) MATH/TRAF domain	2	07195, 07194
509	(IPR000834) Peptidase M14, carboxypeptidase A	2	08692, 11618
510	(IPR005900) 6-phosphogluconolactonase, DevB-type	2	04765, 04764
511	(IPR009048) Alpha-macroglobulin, receptor-binding	2	08638, 10310
512	(IPR019181) Anticodon-binding domain	2	04041, 04040
513	(IPR033883) Calpain subdomain III	2	04152, 04153
514	(IPR041951) STARD10, START domain	2	04716, 04936
515	(IPR041715) Class II Histidinyl-tRNA synthetase (HisRS)-like catalytic core domain	2	02519, 02520
516	(IPR033471) DIRP domain	2	04284, 04285
517	(IPR000297) Peptidyl-prolyl cis-trans isomerase, PpiC-type	2	13404, 12860
518	(IPR039429) Serine hydroxymethyltransferase-like domain	2	08496, 13666
519	(IPR000209) Peptidase S8/S53 domain	2	05022, 08337
520	(IPR032095) Saccharopine dehydrogenase, C-terminal	2	00533, 15193
521	(IPR015310) Activator of Hsp90 ATPase, N-terminal	2	04831, 04830
522	(IPR001199) Cytochrome b5-like heme/steroid binding domain	2	08626, 11785
523	(IPR017941) Rieske [2Fe-2S] iron-sulphur domain	2	05798, 03288
524	(IPR002547) tRNA-binding domain	2	10218, 09973
525	(IPR015341) Glycoside hydrolase family 38, central domain	2	05657, 05656
526	(IPR017984) Chromo domain subgroup	2	13859, 10438
527	(IPR001678) SAM-dependent methyltransferase RsmB/NOP2-type	2	00336, 10934
528	(IPR015425) Formin, FH2 domain	2	08195, 11640
529	(IPR003754) Tetrapyrrole biosynthesis, uroporphyrinogen III synthase	2	04929, 04928
530	(IPR028939) Pyrroline-5-carboxylate reductase, catalytic, N-terminal	2	06153, 06152
531	(IPR008909) DALR anticodon binding	2	03821, 07972
532	(IPR007741) Ribosomal protein/NADH dehydrogenase domain	2	12629, 03546
533	(IPR007651) Lipin, N-terminal	2	03815, 03817
534	(IPR001194) cDENN domain	2	16513, 07612
535	(IPR023572) Archease domain	2	02761, 02760
536	(IPR007196) CCR4-Not complex component, Not1, C-terminal	2	10009, 08764
537	(IPR007275) YTH domain	2	10700, 08412
538	(IPR003609) PAN/Apple domain	2	05362, 00311
539	(IPR002498) Phosphatidylinositol-4-phosphate 5-kinase, core	2	12149, 10993
540	(IPR004871) Cleavage/polyadenylation specificity factor, A subunit, C-terminal	2	08213, 10459
541	(IPR040990) Domain of unknown function DUF5600	2	01723, 08284
542	(IPR019473) Transcription factor TFIID, subunit 8, C-terminal	2	06120, 06121
543	(IPR015917) Peptidase C14A, caspase catalytic domain	2	10326, 15671
544	(IPR005835) Nucleotidyl transferase domain	2	08311, 08601
545	(IPR020617) Thiolase, C-terminal	2	13842, 09577
546	(IPR018612) Domain of unknown function DUF2040	2	05046, 05047
547	(IPR007638) Glutaminyl-tRNA synthetase, class Ib, non-specific RNA-binding domain 2	2	07155, 07154
548	(IPR005797) Cytochrome b/b6, N-terminal	2	16680, 00652
549	(IPR002713) FF domain	2	04582, 04209
550	(IPR022673) Hexokinase, C-terminal	2	04853, 04852
551	(IPR025954) DBC1/CARP1 catalytically inactive NUDIX hydrolase domain	2	08466, 00454
552	(IPR039430) Thymidylate kinase-like domain	2	11206, 14765
553	(IPR022158) Inositol phosphatase	2	12592, 16625
554	(IPR034753) hSac2 domain	2	12592, 16625
555	(IPR007135) Autophagy-related protein 3	2	04596, 04597
556	(IPR033916) Npc2 like, ML domain	2	10968, 13544
557	(IPR004099) Pyridine nucleotide-disulphide oxidoreductase, dimerisation domain	2	08222, 08252
558	(IPR013578) Peptidase M16C associated	2	03706, 03707
559	(IPR003619) MAD homology 1, Dwarfin-type	2	05288, 05289
560	(IPR039551) Choline/carnitine acyltransferase domain	2	04938, 12211
561	(IPR016082) Ribosomal protein L30, ferredoxin-like fold domain	2	08806, 11140
562	(IPR004009) Myosin, N-terminal, SH3-like	2	11469, 12234
563	(IPR002138) Peptidase C14, caspase non-catalytic subunit p10	2	10326, 10662
564	(IPR020040) Ribosomal protein L6, alpha-beta domain	2	04039, 04038
565	(IPR015405) NADH-quinone oxidoreductase, chain G, C-terminal	2	01060, 01059
566	(IPR025696) rRNA-processing arch domain	2	05404, 05405
567	(IPR002792) TRAM domain	2	13096, 03204
568	(IPR007588) Zinc finger, FLYWCH-type	2	02905, 02904
569	(IPR005818) Linker histone H1/H5, domain H15	2	05837, 05836
570	(IPR013791) RNA 3'-terminal phosphate cyclase, insert domain	2	09083, 12012
571	(IPR039667) Dolichyldiphosphatase, PAP2 domain	2	05790, 05791
572	(IPR007034) Ribosome biogenesis protein BMS1/TSR1, C-terminal	2	09988, 10769
573	(IPR013632) DNA recombination and repair protein Rad51-like, C-terminal	2	05516, 05517
574	(IPR022712) Beta-Casp domain	2	13944, 09453
575	(IPR039192) Glycogen synthase kinase 3, catalytic domain	2	05093, 05092
576	(IPR002999) Tudor domain	2	04148, 02500
577	(IPR022800) Spt4/RpoE2 zinc finger	2	05187, 05186
578	(IPR012974) NOP5, N-terminal	2	04435, 04434
579	(IPR019383) Golgin subfamily A member 7/ERF4	2	06196, 14529
580	(IPR000159) Ras-associating (RA) domain	2	10358, 13207
581	(IPR001766) Fork head domain	2	10092, 08676
582	(IPR007714) CFA20 domain	2	06502, 11163
583	(IPR031973) Deltamethrin resistance protein prag01	2	06398, 06399
584	(IPR009771) Ribosome control protein 1	2	04264, 04265
585	(IPR007867) Glucose-methanol-choline oxidoreductase, C-terminal	2	00179, 07268
586	(IPR039008) Intermediate filament, rod domain	2	08539, 06844
587	(IPR041048) RuvB-like, AAA-lid domain	2	08813, 08786
588	(IPR005849) Galactose-1-phosphate uridyl transferase, N-terminal	2	10308, 11849
589	(IPR006933) HAP1, N-terminal	2	06276, 06277
590	(IPR004100) ATPase, F1/V1/A1 complex, alpha/beta subunit, N-terminal domain	2	08473, 02105
591	(IPR041431) Mvd1, C-terminal	2	05446, 05447
592	(IPR019577) SPARC/Testican, calcium-binding domain	2	09595, 12168
593	(IPR003495) CobW/HypB/UreG, nucleotide-binding domain	2	04947, 04946
594	(IPR013170) mRNA splicing factor Cwf21 domain	2	03429, 03430
595	(IPR011761) ATP-grasp fold	2	03271, 08210
596	(IPR018785) Cysteine-rich domain, DPF-motif	2	04011, 04010
597	(IPR034012) Pol II subunit B9, C-terminal zinc ribbon	2	07135, 07134
598	(IPR000909) Phosphatidylinositol-specific phospholipase C, X domain	2	03865, 03864
599	(IPR013719) Domain of unknown function DUF1747	2	08272, 10740
600	(IPR006925) Vps16, C-terminal	2	06694, 06695
601	(IPR016009) tRNA methyltransferase TRMD/TRM10-type domain	2	09457, 10835
602	(IPR014038) Translation elongation factor EF1B, beta/delta subunit, guanine nucleotide exchange domain	2	00463, 10410
603	(IPR015894) Guanylate-binding protein, N-terminal	2	08541, 12600
604	(IPR014731) Electron transfer flavoprotein, alpha subunit, C-terminal	2	02306, 02307
605	(IPR018955) Branched-chain alpha-ketoacid dehydrogenase kinase/Pyruvate dehydrogenase kinase, N-terminal	2	03649, 04216
606	(IPR019147) Suppressor of white apricot, N-terminal domain	2	15375, 06468
607	(IPR028564) tRNA methyltransferase TRM10-type domain	2	09457, 10835
608	(IPR041330) KN17, SH3-like C-terminal domain	2	05376, 05388
609	(IPR030386) GB1/RHD3-type guanine nucleotide-binding (G) domain	2	08541, 12600
610	(IPR006677) tRNA intron endonuclease, catalytic domain-like	2	03485, 03484
611	(IPR001537) tRNA/rRNA methyltransferase, SpoU type	2	09692, 11595
612	(IPR010652) Domain of unknown function DUF1232	2	02155, 02156
613	(IPR003607) HD/PDEase domain	2	04536, 12395
614	(IPR009081) Phosphopantetheine binding ACP domain	2	12974, 14327
615	(IPR041993) G-patch domain and KOW motifs-containing protein, KOW 1	2	05389, 05388
616	(IPR001772) Kinase associated domain 1 (KA1)	2	02674, 02673
617	(IPR005576) RNA polymerase Rpb7-like , N-terminal	2	10501, 10629
618	(IPR031336) Cell division control protein 73, C-terminal	2	00276, 00277
619	(IPR000897) Signal recognition particle, SRP54 subunit, GTPase domain	2	04164, 03313
620	(IPR023611) Ribosomal protein S23/S25, mitochondrial	2	06764, 06765
621	(IPR019103) Aspartic peptidase, DDI1-type	2	03968, 03967
622	(IPR007707) Transforming acidic coiled-coil-containing protein, C-terminal	2	12517, 10473
623	(IPR023798) Ribosomal protein S7 domain	2	11050, 12060
624	(IPR041095) Elongation Factor G, domain II	2	01952, 01951
625	(IPR014886) La protein, RNA-binding domain	2	04732, 04733
626	(IPR000863) Sulfotransferase domain	2	10733, 10050
627	(IPR002906) Ribosomal protein S27a	2	00847, 00841
628	(IPR000073) Alpha/beta hydrolase fold-1	2	09439, 04762
629	(IPR001879) GPCR, family 2, extracellular hormone receptor domain	2	13219, 10609
630	(IPR000536) Nuclear hormone receptor, ligand-binding domain	2	15071, 12473
631	(IPR004910) Yippee/Mis18/Cereblon	2	13810, 08306
632	(IPR013085) U1-C, C2H2-type zinc finger	2	13821, 01724
633	(IPR019443) FMP27, C-terminal	2	06539, 06538
634	(IPR000192) Aminotransferase class V domain	2	04194, 04380
635	(IPR025257) Domain of unknown function DUF4205	2	17139, 08425
636	(IPR006114) 6-phosphogluconate dehydrogenase, C-terminal	2	03067, 03066
637	(IPR022577) Tubulin-specific chaperone D, C-terminal	2	07173, 07172
638	(IPR006317) Ubiquinol-cytochrome c reductase, iron-sulphur subunit	2	05798, 03288
639	(IPR006155) Josephin domain	2	03392, 10668
640	(IPR009449) GDP/GTP exchange factor Sec2, N-terminal	2	04570, 04571
641	(IPR037516) Tripartite DENN domain	2	16513, 07612
642	(IPR005607) BSD domain	2	13107, 08962
643	(IPR040676) Domain of unknown function DUF5641	2	05860, 05861
644	(IPR007085) DNA/pantothenate metabolism flavoprotein, C-terminal	2	05330, 05331
645	(IPR023451) Thymidylate synthase/dCMP hydroxymethylase domain	2	04015, 04014
646	(IPR004172) L27 domain	2	14577, 10430
647	(IPR022052) Histone-binding protein RBBP4, N-terminal	2	11615, 08726
648	(IPR005479) Carbamoyl-phosphate synthetase large subunit-like, ATP-binding domain	2	03271, 08210
649	(IPR007886) Alanine dehydrogenase/pyridine nucleotide transhydrogenase, N-terminal	2	10689, 13425
650	(IPR002719) Retinoblastoma-associated protein, B-box	2	04191, 04190
651	(IPR041406) COP9 signalosome complex subunit 4, helix turn helix domain	2	03876, 03875
652	(IPR011063) tRNA(Ile)-lysidine/2-thiocytidine synthase, N-terminal	2	05491, 05490
653	(IPR011128) Glycerol-3-phosphate dehydrogenase, NAD-dependent, N-terminal	2	05669, 12246
654	(IPR006769) Calcium uniporter protein, C-terminal	2	03400, 09335
655	(IPR006145) Pseudouridine synthase, RsuA/RluA	2	10291, 02239
656	(IPR015021) Domain of unknown function DUF1907	2	16219, 12365
657	(IPR022023) U1 small nuclear ribonucleoprotein of 70kDa N-terminal	2	05518, 05519
658	(IPR000023) Phosphofructokinase domain	2	01714, 01713
659	(IPR010504) Arfaptin homology (AH) domain	2	08435, 10693
660	(IPR000315) B-box-type zinc finger	2	09928, 03781
661	(IPR003379) Carboxylase, conserved domain	2	04154, 04155
662	(IPR033925) Rad51/DMC1/RadA	2	05516, 05517
663	(IPR004853) Sugar phosphate transporter domain	2	11507, 08555
664	(IPR013583) Phosphoribosyltransferase C-terminal	2	09656, 08937
665	(IPR011611) Carbohydrate kinase PfkB	2	09527, 02079
666	(IPR006568) PSP, proline-rich	2	08658, 04474
667	(IPR000237) GRIP domain	2	13756, 10351
668	(IPR024159) Adaptor protein Cbl, PTB domain	2	17530, 16988
669	(IPR008336) DNA topoisomerase I, DNA binding, eukaryotic-type	2	01315, 12839
670	(IPR001180) Citron homology (CNH) domain	2	09413, 10672
671	(IPR006176) 3-hydroxyacyl-CoA dehydrogenase, NAD binding	2	18097, 11685
672	(IPR000819) Peptidase M17, leucyl aminopeptidase, C-terminal	2	08859, 05524
673	(IPR019451) RNA polymerase II assembly factor Rtp1, C-terminal	2	05075, 05074
674	(IPR000928) SNAP-25 domain	2	04473, 04472
675	(IPR020587) DNA recombination and repair protein RecA, monomer-monomer interface	2	05516, 05517
676	(IPR040455) Atg6, BARA domain	2	03801, 03800
677	(IPR007699) SGS domain	2	01226, 01227
678	(IPR003119) Saposin A-type domain	2	09023, 08348
679	(IPR012592) PROCN domain	2	03591, 03592
680	(IPR032442) Cytoplasmic tRNA 2-thiolation protein 1, C-terminal	2	05491, 05490
681	(IPR024771) SUZ domain	2	01975, 01976
682	(IPR005122) Uracil-DNA glycosylase-like	2	11326, 11063
683	(IPR001950) SUI1 domain	2	09921, 01250
684	(IPR021563) Rab interacting lysosomal protein, dimerization domain	2	05529, 05528
685	(IPR033248) Transketolase, C-terminal domain	2	09193, 09302
686	(IPR008580) PPPDE putative peptidase domain	2	04648, 04649
687	(IPR039530) RNA-directed RNA polymerase L methyltransferase domain, rhabdovirus	2	08218, 08204
688	(IPR032368) UCH-binding domain	2	04959, 08921
689	(IPR003185) Proteasome activator PA28, N-terminal domain	2	05697, 05696
690	(IPR001223) Glycoside hydrolase family 18, catalytic domain	2	04549, 04548
691	(IPR000352) Peptide chain release factor class I	2	06917, 11840
692	(IPR006767) Cwf19-like protein, C-terminal domain-2	2	09877, 10219
693	(IPR006768) Cwf19-like, C-terminal domain-1	2	09877, 10219
694	(IPR001608) Alanine racemase, N-terminal	2	05068, 05069
695	(IPR031775) cGMP-dependent protein kinase, interacting domain	2	05406, 05407
696	(IPR023797) RNA 3'-terminal phosphate cyclase domain	2	09083, 12012
697	(IPR020588) DNA recombination and repair protein RecA-like, ATP-binding domain	2	05516, 05517
698	(IPR004521) Uncharacterised domain CHP00451	2	11985, 08830
699	(IPR020097) Pseudouridine synthase I, TruA, alpha/beta domain	2	11238, 08844
700	(IPR013019) MAD homology, MH1	2	05288, 05289
701	(IPR001632) G-protein, beta subunit	2	14679, 04704
702	(IPR014811) Argonaute, linker 1 domain	2	06649, 10408
703	(IPR033745) Mitochondria fission protein Fis1, cytosolic domain	2	02405, 02406
704	(IPR003140) Phospholipase/carboxylesterase/thioesterase	2	04467, 04466
705	(IPR012936) Endoplasmic reticulum vesicle transporter, C-terminal	2	08557, 08678
706	(IPR005326) Plectin/S10, N-terminal	2	06907, 17399
707	(IPR006121) Heavy metal-associated domain, HMA	2	07880, 14485
708	(IPR000361) FeS cluster biogenesis	2	07624, 10783
709	(IPR031984) Solute carrier family 3 member 2, N-terminal domain	2	03856, 03857
710	(IPR005324) Ribosomal protein S5, C-terminal	2	05904, 10706
711	(IPR020829) Glyceraldehyde 3-phosphate dehydrogenase, catalytic domain	2	03984, 03983
712	(IPR034744) RH2 domain	2	05529, 05528
713	(IPR000433) Zinc finger, ZZ-type	2	09207, 10020
714	(IPR015016) Splicing factor 3B subunit 1	2	14428, 13827
715	(IPR027789) Syndecan/Neurexin domain	2	05006, 05007
716	(IPR004826) Basic leucine zipper domain, Maf-type	2	09911, 09342
717	(IPR005846) Alpha-D-phosphohexomutase, alpha/beta/alpha domain III	2	04884, 08467
718	(IPR007185) DNA polymerase alpha/delta/epsilon, subunit B	2	05154, 09006
719	(IPR041577) Reverse transcriptase/retrotransposon-derived protein, RNase H-like domain	2	14294, 15480
720	(IPR018998) EndoU ribonuclease, C-terminal	2	15171, 17959
721	(IPR018965) Ubiquitin-activating enzyme E1, C-terminal	2	11283, 08621
722	(IPR007529) Zinc finger, HIT-type	2	12976, 04458
723	(IPR019498) MENTAL domain	2	02465, 02466
724	(IPR010400) PITH domain	2	11439, 08826
725	(IPR000938) CAP Gly-rich domain	2	08673, 10456
726	(IPR016180) Ribosomal protein L10e/L16	2	11953, 10716
727	(IPR034884) Mitochondrial cytochrome c oxidase subunit VIc/VIIs	2	02495, 02496
728	(IPR025723) Anion-transporting ATPase-like domain	2	16135, 09268
729	(IPR021715) Pre-mRNA-splicing factor SLU7 domain	2	08554, 14399
730	(IPR022669) Ribosomal protein L2, C-terminal	2	11027, 11176
731	(IPR014892) Replication protein A, C-terminal	2	04973, 04972
732	(IPR004328) BRO1 domain	2	09713, 15934
733	(IPR034148) NCBP2, RNA recognition motif	2	04823, 04822
734	(IPR019474) Ubiquitin conjugation factor E4, core	2	00261, 08787
735	(IPR015847) Exoribonuclease, phosphorolytic domain 2	2	03838, 03839
736	(IPR034922) RNA exonuclease 1-like, exonuclease domain	2	02623, 02621
737	(IPR004647) Fe-S hydro-lyase, tartrate dehydratase beta-type, catalytic domain	2	04544, 14321
738	(IPR026888) Acetyl-CoA hydrolase/transferase C-terminal domain	2	04198, 04199
739	(IPR024610) Inhibitor of growth protein, N-terminal histone-binding	2	11582, 15852
740	(IPR019461) Autophagy-related protein 3, C-terminal	2	04596, 04597
741	(IPR015338) Glycosyl transferase 64 domain	2	12598, 11919
742	(IPR019197) Biotin-protein ligase, N-terminal	2	06265, 06264
743	(IPR000566) Lipocalin/cytosolic fatty-acid binding domain	2	13946, 13159
744	(IPR025313) Domain of unknown function DUF4217	2	08208, 11068
745	(IPR007474) ApaG domain	2	04873, 04872
746	(IPR002942) RNA-binding S4 domain	2	00326, 13258
747	(IPR020860) MIRO domain	2	16607, 08798
748	(IPR019131) Cortactin-binding protein-2, N-terminal	2	07779, 07778
749	(IPR037523) Vicinal oxygen chelate (VOC) domain	2	00046, 09618
750	(IPR012961) ATP-dependent RNA helicase Ski2, C-terminal	2	15979, 05404
751	(IPR001494) Importin-beta, N-terminal domain	2	05870, 05871
752	(IPR003618) Transcription elongation factor S-II, central domain	1	4510
753	(IPR040706) MYST, zinc finger domain	1	9571
754	(IPR010473) Formin, GTPase-binding domain	1	12864
755	(IPR002720) Retinoblastoma-associated protein, A-box	1	4191
756	(IPR022672) Hexokinase, N-terminal	1	6246
757	(IPR015211) Peptidase M1, leukotriene A4 hydrolase/aminopeptidase C-terminal	1	8737
758	(IPR029347) Raptor, N-terminal CASPase-like domain	1	17121
759	(IPR030484) Serine/threonine-protein kinase Rio2	1	989
760	(IPR032819) tRNA pseudouridylate synthase B, C-terminal	1	8830
761	(IPR014881) Nin one binding (NOB1) Zn-ribbon-like	1	2210
762	(IPR019010) Eukaryotic translation initiation factor 3 subunit E, N-terminal	1	8553
763	(IPR032028) Cleavage stimulation factor subunit 1, dimerisation domain	1	8910
764	(IPR022735) bMERB domain	1	11972
765	(IPR013749) Pyridoxamine kinase/Phosphomethylpyrimidine kinase	1	11308
766	(IPR022164) Kinesin-like	1	13765
767	(IPR040233) Domain of unknown function DUF2052	1	16116
768	(IPR002872) Proline dehydrogenase domain	1	8620
769	(IPR006131) Aspartate/ornithine carbamoyltransferase, Asp/Orn-binding domain	1	9200
770	(IPR011021) Arrestin-like, N-terminal	1	9575
771	(IPR000519) P-type trefoil domain	1	14319
772	(IPR032198) E2F transcription factor, CC-MB domain	1	11864
773	(IPR013636) Domain of unknown function DUF1741	1	8570
774	(IPR001268) NADH:ubiquinone oxidoreductase, 30kDa subunit	1	6192
775	(IPR011430) Down-regulated-in-metastasis protein	1	17334
776	(IPR012955) CASP, C-terminal	1	9953
777	(IPR011421) BCNT-C domain	1	11954
778	(IPR021983) PRP8 domain IV core	1	8568
779	(IPR040661) Leucine zipper with capping helix domain	1	11405
780	(IPR032425) Talin, N-terminal F0 domain	1	5438
781	(IPR028146) Glucosidase II beta subunit, N-terminal	1	8757
782	(IPR013122) Polycystin cation channel, PKD1/PKD2	1	17714
783	(IPR032305) GTP-binding protein, middle domain	1	9941
784	(IPR031774) SF3A3 domain	1	8820
785	(IPR018289) MULE transposase domain	1	13284
786	(IPR010776) Homologous-pairing protein 2, winged helix domain	1	11405
787	(IPR032443) RAWUL domain	1	9608
788	(IPR024977) Anaphase-promoting complex subunit 4, WD40 domain	1	3235
789	(IPR014039) Translation elongation factor EFTs/EF1B, dimerisation	1	9294
790	(IPR041623) NOG1, N-terminal helical domain	1	8277
791	(IPR005147) tRNA synthetase, B5-domain	1	10874
792	(IPR029190) Ribosomal RNA-processing protein 14/surfeit locus protein 6, C-terminal domain	1	6204
793	(IPR000697) WH1/EVH1 domain	1	16701
794	(IPR024954) SSRP1 domain	1	8272
795	(IPR025069) Cleavage and polyadenylation specificity factor 2, C-terminal	1	8745
796	(IPR000700) PAS-associated, C-terminal	1	12492
797	(IPR015195) SLIDE domain	1	9895
798	(IPR013957) U4/U6.U5 small nuclear ribonucleoprotein 27kDa protein	1	4092
799	(IPR000432) DNA mismatch repair protein MutS, C-terminal	1	11218
800	(IPR007705) Vesicle transport v-SNARE, N-terminal	1	8549
801	(IPR002716) PIN domain	1	5400
802	(IPR022676) Myristoyl-CoA:protein N-myristoyltransferase, N-terminal	1	4897
803	(IPR008147) Glutamine synthetase, beta-Grasp domain	1	8423
804	(IPR017926) Glutamine amidotransferase	1	9447
805	(IPR040663) DNA polymerase delta subunit, OB-fold domain	1	9006
806	(IPR002300) Aminoacyl-tRNA synthetase, class Ia	1	12112
807	(IPR007644) RNA polymerase, beta subunit, protrusion	1	13922
808	(IPR000421) Coagulation factor 5/8 C-terminal domain	1	12919
809	(IPR039467) Transcription factor TFIIIB component B'', Myb domain	1	12333
810	(IPR008913) Zinc finger, CHY-type	1	8310
811	(IPR021720) Malectin domain	1	10091
812	(IPR041525) Nicotinate/nicotinamide phosphoribosyltransferase	1	10170
813	(IPR035248) PRMT5, oligomerisation domain	1	6900
814	(IPR028034) CCDC81, HU domain 1	1	15995
815	(IPR003888) FY-rich, N-terminal	1	14975
816	(IPR022049) FAM69, protein-kinase domain	1	9678
817	(IPR002004) Polyadenylate-binding protein/Hyperplastic disc protein	1	10040
818	(IPR025755) 60S ribosomal protein L4, C-terminal domain	1	748
819	(IPR041988) Ribosomal Protein L26/L24, KOW domain	1	9432
820	(IPR012617) Apoptosis-antagonizing transcription factor, C-terminal	1	7920
821	(IPR013507) DNA mismatch repair protein, S5 domain 2-like	1	11690
822	(IPR029307) INTS6/SAGE1/DDX26B/CT45, C-terminal	1	11680
823	(IPR001346) Interferon regulatory factor DNA-binding domain	1	9110
824	(IPR010935) SMCs flexible hinge	1	9788
825	(IPR038738) Nedd8-like ubiquitin	1	11910
826	(IPR040662) Transcription factor Tfb2, C-terminal domain	1	14702
827	(IPR015866) Serine-tRNA synthetase, type1, N-terminal	1	11939
828	(IPR001179) FKBP-type peptidyl-prolyl cis-trans isomerase domain	1	324
829	(IPR000867) Insulin-like growth factor-binding protein, IGFBP	1	9275
830	(IPR001510) Zinc finger, PARP-type	1	13560
831	(IPR013106) Immunoglobulin V-set domain	1	10873
832	(IPR040497) Glucosyltransferase 24, catalytic domain	1	4399
833	(IPR011531) Bicarbonate transporter, C-terminal	1	12241
834	(IPR033732) ATP synthase, F1 complex, alpha subunit nucleotide-binding domain	1	8473
835	(IPR031595) Protein-only RNase P, C-terminal	1	10712
836	(IPR006887) Domain of unknown function DUF625	1	12093
837	(IPR013577) Lethal giant larvae homologue 2	1	17737
838	(IPR031717) Multifunctional 2-oxoglutarate metabolism enzyme, C-terminal	1	8324
839	(IPR003350) CUT domain	1	16545
840	(IPR012913) Protein OS9-like	1	9030
841	(IPR041872) Methionyl-tRNA synthetase, anticodon-binding domain	1	9939
842	(IPR024675) Eukaryotic translation initiation factor 3 subunit G, N-terminal	1	127
843	(IPR013843) Ribosomal protein S4e, N-terminal	1	326
844	(IPR013167) Conserved oligomeric Golgi complex, subunit 4	1	3916
845	(IPR041233) Alpha galactosidase, C-terminal beta sandwich domain	1	8906
846	(IPR001936) Ras GTPase-activating domain	1	10726
847	(IPR004015) SKI-interacting protein SKIP, SNW domain	1	8485
848	(IPR010961) Tetrapyrrole biosynthesis, 5-aminolevulinic acid synthase	1	9549
849	(IPR041198) GGA, N-GAT domain	1	11171
850	(IPR007365) Transferrin receptor-like, dimerisation domain	1	10878
851	(IPR025733) Iron/zinc purple acid phosphatase-like C-terminal domain	1	9127
852	(IPR041170) RING/Ubox-like zinc-binding domain	1	13380
853	(IPR018978) Ribosome maturation protein SBDS, C-terminal	1	5090
854	(IPR007667) Hypoxia induced protein, domain	1	3309
855	(IPR037749) Extended synaptotagmin, C2B domain	1	8457
856	(IPR012960) Dyskerin-like	1	8830
857	(IPR005845) Alpha-D-phosphohexomutase, alpha/beta/alpha domain II	1	8467
858	(IPR029099) Ribose-phosphate pyrophosphokinase, N-terminal domain	1	3001
859	(IPR029123) Splicing factor RBM39, linker	1	9780
860	(IPR000327) POU-specific domain	1	9791
861	(IPR013180) Beta-catenin-like protein 1, N-terminal	1	6212
862	(IPR007051) CHORD domain	1	8624
863	(IPR034158) SF3B4, RNA recognition motif 1	1	17702
864	(IPR006153) Cation/H+ exchanger	1	8660
865	(IPR018863) Fragile site-associated protein, C-terminal	1	14359
866	(IPR015174) MIF4G-like, type 2	1	8635
867	(IPR000949) ELM2 domain	1	12184
868	(IPR002877) Ribosomal RNA methyltransferase FtsJ domain	1	14742
869	(IPR005043) Exportin-2, C-terminal	1	9674
870	(IPR035373) Alpha galactosidase A, C-terminal beta-sandwich domain	1	9436
871	(IPR032436) Nucleolar pre-ribosomal-associated protein 1, C-terminal domain	1	6244
872	(IPR006116) 2-5-oligoadenylate synthetase, N-terminal	1	15818
873	(IPR011899) Glutaredoxin, eukaryotic/virial	1	8222
874	(IPR013137) Zinc finger, TFIIB-type	1	8232
875	(IPR025136) Domain of unknown function DUF4071	1	13488
876	(IPR021966) Splicing factor SF3a60 binding domain	1	8820
877	(IPR006086) XPG-I domain	1	3735
878	(IPR037431) RNA exonuclease 4, DEDDh 3'-5' exonuclease domain	1	4000
879	(IPR015096) Far upstream element-binding protein, C-terminal	1	4958
880	(IPR004102) Poly(ADP-ribose) polymerase, regulatory domain	1	11574
881	(IPR009688) Domain of unknown function DUF1279	1	11600
882	(IPR003228) Transcription initiation factor TFIID subunit 12 domain	1	16206
883	(IPR019554) Soluble ligand binding domain	1	45
884	(IPR012932) Vitamin K epoxide reductase	1	11858
885	(IPR006640) SprT-like	1	11151
886	(IPR010714) Coatomer, alpha subunit, C-terminal	1	9199
887	(IPR012959) CPL domain	1	9403
888	(IPR032420) Ubiquitin-activating enzyme E1, four-helix bundle	1	9665
889	(IPR031160) F-BAR domain	1	13858
890	(IPR023379) BART domain	1	18241
891	(IPR000573) Aconitase A/isopropylmalate dehydratase small subunit, swivel domain	1	4346
892	(IPR011124) Zinc finger, CW-type	1	4576
893	(IPR031310) Ribosomal protein L5, N-terminal	1	12822
894	(IPR012972) NLE	1	12179
895	(IPR013786) Acyl-CoA dehydrogenase/oxidase, N-terminal	1	7218
896	(IPR001365) Adenosine/AMP deaminase domain	1	8972
897	(IPR034775) Splicing factor ELAV/Hu, RNA recognition motif 1	1	3818
898	(IPR021819) Far11/STRP, C-terminal	1	5566
899	(IPR011524) SARAH domain	1	9368
900	(IPR016093) MIR motif	1	10397
901	(IPR013874) Cdc37, Hsp90 binding	1	8365
902	(IPR013586) 26S proteasome regulatory subunit, C-terminal	1	4496
903	(IPR041811) RAD23A/RAD23B, UBA1 domain	1	8494
904	(IPR001208) MCM domain	1	11048
905	(IPR007012) Poly(A) polymerase, central domain	1	9745
906	(IPR035417) FACT complex subunit POB3-like, N-terminal PH domain	1	8272
907	(IPR039515) NOT4, modified RING finger, HC subclass (C4C4-type)	1	3040
908	(IPR013718) COQ9	1	4706
909	(IPR040750) eIF3 subunit M, C-terminal helix domain	1	9411
910	(IPR007949) SDA1 domain	1	9964
911	(IPR022141) Plasma membrane calcium transporting P-type ATPase, C-terminal	1	12134
912	(IPR021893) Protein of unknown function DUF3504	1	8376
913	(IPR006091) Acyl-CoA oxidase/dehydrogenase, central domain	1	14211
914	(IPR000061) SWAP/Surp	1	13992
915	(IPR001509) NAD-dependent epimerase/dehydratase	1	4721
916	(IPR006693) Partial AB-hydrolase lipase domain	1	4763
917	(IPR000323) Copper type II, ascorbate-dependent monooxygenase, N-terminal	1	586
918	(IPR019467) Histone acetyl transferase HAT1 N-terminal	1	12798
919	(IPR005824) KOW	1	326
920	(IPR015399) Domain of unknown function DUF1977, DnaJ-like	1	3108
921	(IPR021865) Peptidase G2, IMC autoproteolytic cleavage domain	1	13419
922	(IPR019273) Lunapark domain	1	8556
923	(IPR001054) Adenylyl cyclase class-3/4/guanylyl cyclase	1	16140
924	(IPR003892) Ubiquitin system component CUE	1	10554
925	(IPR006895) Zinc finger, Sec23/Sec24-type	1	16682
926	(IPR000722) RNA polymerase, alpha subunit	1	16275
927	(IPR013750) GHMP kinase, C-terminal domain	1	11748
928	(IPR006787) Pinin/SDK	1	8542
929	(IPR006075) Aspartyl/Glutamyl-tRNA(Gln) amidotransferase, subunit B/E, catalytic	1	10161
930	(IPR017884) SANT domain	1	9895
931	(IPR007871) Methyltransferase TRM13	1	11906
932	(IPR006132) Aspartate/ornithine carbamoyltransferase, carbamoyl-P binding	1	9200
933	(IPR012983) PHR	1	12124
934	(IPR032362) Ferlin, C-terminal domain	1	9067
935	(IPR041792) Purple acid phosphatase, metallophosphatase domain	1	9127
936	(IPR041418) SAM domain	1	9115
937	(IPR041174) Krr1, KH1 domain	1	5384
938	(IPR010733) Domain of unknown function DUF1308	1	9959
939	(IPR040618) Pre-nudix hydrolase domain	1	9004
940	(IPR003265) HhH-GPD domain	1	13014
941	(IPR006070) YrdC-like domain	1	12986
942	(IPR040790) Kindlin-2, N-terminal	1	10200
943	(IPR007708) Lariat debranching enzyme, C-terminal	1	11086
944	(IPR017892) Protein kinase, C-terminal	1	4312
945	(IPR012957) CHD, C-terminal 2	1	8695
946	(IPR038922) Huntingtin-interacting protein K, UBA-like domain	1	13584
947	(IPR011678) ER membrane protein complex subunit 1, C-terminal	1	8905
948	(IPR006809) TAFII28-like protein	1	12138
949	(IPR013819) Lipoxygenase, C-terminal	1	1701
950	(IPR024989) Major facilitator superfamily associated domain	1	9034
951	(IPR022418) Porphobilinogen deaminase, C-terminal	1	10207
952	(IPR011263) DNA-directed RNA polymerase, RpoA/D/Rpb3-type	1	11017
953	(IPR025986) RNA-polymerase II-associated protein 3-like, C-terminal domain	1	8772
954	(IPR013992) Adenylate cyclase-associated CAP, N-terminal	1	445
955	(IPR022310) NAD/GMP synthase	1	5264
956	(IPR011259) Ezrin/radixin/moesin, C-terminal	1	8226
957	(IPR033647) AAR2, N-terminal	1	5228
958	(IPR025239) Domain of unknown function DUF4187	1	17118
959	(IPR025202) Phospholipase D-like domain	1	13632
960	(IPR006921) Interferon-related developmental regulator, C-terminal	1	37
961	(IPR028231) Transcription elongation factor Spt6, YqgF domain	1	16395
962	(IPR022648) Proliferating cell nuclear antigen, PCNA, N-terminal	1	11066
963	(IPR015865) Riboflavin kinase domain, bacterial/eukaryotic	1	12688
964	(IPR039481) Exocyst complex component EXOC2/Sec5, N-terminal domain	1	11010
965	(IPR034932) BRAP2, RNA recognition motif	1	15175
966	(IPR032640) AMP-activated protein kinase, glycogen-binding domain	1	14172
967	(IPR017916) Steadiness box (SB) domain	1	8747
968	(IPR035655) 116kDa U5 small nuclear ribonucleoprotein component, C-terminal	1	9776
969	(IPR010795) Prenylcysteine lyase	1	9452
970	(IPR019175) Prp31 C-terminal	1	11029
971	(IPR007835) MOFRL domain	1	5182
972	(IPR011146) HIT-like domain	1	11817
973	(IPR015939) Fumarate reductase/succinate dehydrogenase flavoprotein-like, C-terminal	1	4612
974	(IPR011074) CRAL/TRIO, N-terminal domain	1	11261
975	(IPR008493) Domain of unknown function DUF775	1	10324
976	(IPR013111) EGF-like domain, extracellular	1	5868
977	(IPR024743) Dynein heavy chain, coiled coil stalk	1	8394
978	(IPR012942) SRR1-like domain	1	5914
979	(IPR021718) Pre-mRNA 3'-end-processing endonuclease polyadenylation factor C-term	1	9453
980	(IPR035420) Spt6, SH2 domain	1	10236
981	(IPR032384) Kinesin-like protein Kif23, Arf6-interacting domain	1	17740
982	(IPR024571) ERAP1-like C-terminal domain	1	9372
983	(IPR011234) Fumarylacetoacetase-like, C-terminal	1	9894
984	(IPR003812) Fido domain	1	10470
985	(IPR013847) POU domain	1	9791
986	(IPR012919) SUN domain	1	8811
987	(IPR031488) WD repeat protein mio, zinc-ribbon like domain	1	6156
988	(IPR034192) SREK1, RNA recognition motif 2	1	10067
989	(IPR000313) PWWP domain	1	13418
990	(IPR007642) RNA polymerase Rpb2, domain 2	1	14287
991	(IPR013912) Adenylate cyclase-associated CAP, C-terminal	1	445
992	(IPR006115) 6-phosphogluconate dehydrogenase, NADP-binding	1	3066
993	(IPR043194) Glyoxalase domain-containing protein 4, C-terminal	1	9618
994	(IPR002501) Pseudouridine synthase II, N-terminal	1	8830
995	(IPR004358) Signal transduction histidine kinase-related protein, C-terminal	1	8861
996	(IPR018999) RNA helicase UPF1, UPF2-interacting domain	1	17861
997	(IPR025934) NudC N-terminal domain	1	10035
998	(IPR011722) Hemimethylated DNA-binding domain	1	4872
999	(IPR027799) Replication termination factor 2, RING-finger	1	10649
1000	(IPR035518) Dolichyl-phosphate beta-glucosyltransferase	1	10241
1001	(IPR032815) Peptidase S8, pro-domain	1	17232
1002	(IPR041412) Xrn1, helical domain	1	210
1003	(IPR034104) Sm-like protein Lsm1	1	14042
1004	(IPR019497) Sorting nexin protein, WASP-binding domain	1	9514
1005	(IPR012588) Exosome-associated factor Rrp6, N-terminal	1	7264
1006	(IPR034750) CULT domain	1	8306
1007	(IPR034014) Pol III subunit C11, C-terminal zinc ribbon	1	13764
1008	(IPR006166) ERCC4 domain	1	6370
1009	(IPR041672) Bap31/Bap29 cytoplasmic coiled-coil domain	1	10051
1010	(IPR031633) DNA replication complex GINS protein SLD5, C-terminal	1	15197
1011	(IPR003114) Phox-associated domain	1	15844
1012	(IPR029036) Pyrroline-5-carboxylate reductase, dimerisation domain	1	6152
1013	(IPR032374) SGTA, homodimerisation domain	1	9289
1014	(IPR041432) Ubiquitinyl hydrolase, variant UBP zinc finger	1	10962
1015	(IPR007527) Zinc finger, SWIM-type	1	14908
1016	(IPR019447) DNA/RNA-binding protein Kin17, conserved domain	1	5376
1017	(IPR009764) Ovarian carcinoma immunoreactive antigen domain	1	11042
1018	(IPR031313) SAPK-interacting protein 1, Pleckstrin-homology domain	1	8904
1019	(IPR002706) DNA-repair protein Xrcc1, N-terminal	1	13298
1020	(IPR035706) Dynein heavy chain, ATP-binding dynein motor region	1	8394
1021	(IPR008152) Clathrin adaptor, alpha/beta/gamma-adaptin, appendage, Ig-like subdomain	1	8519
1022	(IPR021869) Ribonuclease Zc3h12a-like, NYN domain	1	11751
1023	(IPR003380) SKI/SNO/DAC domain	1	17716
1024	(IPR008269) Peptidase S16, Lon proteolytic domain	1	11301
1025	(IPR013150) Transcription factor TFIIB, cyclin-like domain	1	8232
1026	(IPR015351) RBP-J/Cbf11/Cbf12, DNA binding	1	14843
1027	(IPR001627) Sema domain	1	15130
1028	(IPR023115) Translation initiation factor IF- 2, domain 3	1	63
1029	(IPR024161) Zinc finger, nanos-type	1	11060
1030	(IPR012958) CHD, N-terminal	1	16862
1031	(IPR013594) Dynein heavy chain, domain-1	1	10994
1032	(IPR006159) Methylmalonyl-CoA mutase, C-terminal	1	4179
1033	(IPR032705) Origin recognition complex subunit 4, C-terminal	1	9028
1034	(IPR015256) Translation initiation factor 2, gamma subunit, C-terminal	1	9657
1035	(IPR001739) Methyl-CpG DNA binding	1	2536
1036	(IPR013886) PI31 proteasome regulator, C-terminal	1	11105
1037	(IPR019401) Zinc finger, CHCC-type	1	15359
1038	(IPR007698) Alanine dehydrogenase/pyridine nucleotide transhydrogenase, NAD(H)-binding domain	1	13836
1039	(IPR010304) Survival motor neuron	1	2500
1040	(IPR032106) 2-oxoglutarate dehydrogenase E1 component, N-terminal domain	1	6577
1041	(IPR015151) Beta-adaptin appendage, C-terminal subdomain	1	8519
1042	(IPR013123) RNA 2-O ribose methyltransferase, substrate binding	1	9692
1043	(IPR033770) Exosome complex exonuclease RRP44, S1 domain	1	10750
1044	(IPR013721) STAG	1	18088
1045	(IPR010506) DMAP1-binding domain	1	13182
1046	(IPR033411) Ribonuclease, PIN domain	1	2210
1047	(IPR013235) PPP domain	1	10033
1048	(IPR014906) Pre-mRNA processing factor 4 (PRP4)-like	1	8969
1049	(IPR010674) Nucleolar GTP-binding protein 1, Rossman-fold domain	1	8277
1050	(IPR021852) Domain of unknown function DUF3456	1	15481
1051	(IPR011417) AP180 N-terminal homology (ANTH) domain	1	12022
1052	(IPR024626) Kri1-like, C-terminal	1	12110
1053	(IPR002655) Acyl-CoA oxidase, C-terminal	1	6422
1054	(IPR024586) DnaJ-like protein C11, C-terminal	1	12309
1055	(IPR018972) Sas10 C-terminal domain	1	10255
1056	(IPR022768) Fascin domain	1	12742
1057	(IPR011682) Glycosyl hydrolase family 38, C-terminal	1	8881
1058	(IPR034743) RH1 domain	1	12481
1059	(IPR041366) Pre-PUA domain	1	11985
1060	(IPR033931) PDK1-type, PH domain	1	8383
1061	(IPR032438) ERCC3/RAD25/XPB helicase, C-terminal domain	1	11343
1062	(IPR010666) Zinc finger, GRF-type	1	11443
1063	(IPR003582) ShKT domain	1	17643
1064	(IPR027353) NET domain	1	10760
1065	(IPR032714) Zinc finger protein DZIP1, N-terminal	1	2133
1066	(IPR006683) Thioesterase domain	1	3638
1067	(IPR014767) Diaphanous autoregulatory (DAD) domain	1	10553
1068	(IPR001975) Ribosomal protein L40e	1	14628
1069	(IPR031341) Ribosomal RNA small subunit methyltransferase F, N-terminal	1	336
1070	(IPR024605) NAD(P) transhydrogenase, alpha subunit, C-terminal	1	16131
1071	(IPR002733) AMMECR1 domain	1	8345
1072	(IPR041285) MID domain of medPIWI	1	129
1073	(IPR013625) Tensin/EPS8 phosphotyrosine-binding domain	1	15641
1074	(IPR034215) RBM42, RNA recognition motif	1	12002
1075	(IPR002937) Amine oxidase	1	10525
1076	(IPR032282) Hydroxyacylglutathione hydrolase, C-terminal domain	1	10141
1077	(IPR022783) GC-rich sequence DNA-binding factor-like domain	1	4610
1078	(IPR032154) Coatomer subunit gamma, C-terminal	1	8755
1079	(IPR034646) UbiB domain, ADCK3-like	1	11843
1080	(IPR032108) CLIP1, zinc knuckle	1	9210
1081	(IPR007324) Sugar-binding domain, putative	1	3948
1082	(IPR026480) Arginine N-methyltransferase 2-like domain	1	10145
1083	(IPR034103) Sm-like protein Lsm8	1	17185
1084	(IPR001791) Laminin G domain	1	8131
1085	(IPR006963) Molybdopterin oxidoreductase, 4Fe-4S domain	1	1061
1086	(IPR000788) Ribonucleotide reductase large subunit, C-terminal	1	13042
1087	(IPR031314) Deoxynucleoside kinase domain	1	8932
1088	(IPR021846) NFACT protein, C-terminal	1	11424
1089	(IPR014810) Fcf2 pre-rRNA processing, C-terminal	1	11324
1090	(IPR007854) Pre-mRNA polyadenylation factor Fip1 domain	1	4572
1091	(IPR019143) JNK/Rab-associated protein-1, N-terminal	1	12481
1092	(IPR000118) Granulin	1	8857
1093	(IPR033744) RBM8, RNA recognition motif	1	12585
1094	(IPR011023) Nop2p	1	336
1095	(IPR001926) Pyridoxal-phosphate dependent enzyme	1	8445
1096	(IPR027450) Alpha-ketoglutarate-dependent dioxygenase AlkB-like	1	10738
1097	(IPR008015) GMP phosphodiesterase, delta subunit	1	16502
1098	(IPR003164) Clathrin adaptor, alpha-adaptin, appendage, C-terminal subdomain	1	9322
1099	(IPR014877) Exportin-1, C-terminal	1	8312
1100	(IPR019331) FAM192A/Fyv6, N-terminal	1	11020
1101	(IPR012541) DBP10, C-terminal	1	5625
1102	(IPR040911) Exostosin, GT47 domain	1	14842
1103	(IPR004942) Roadblock/LAMTOR2 domain	1	12527
1104	(IPR006549) HAD-superfamily hydrolase,subfamily IIIA	1	806
1105	(IPR007287) Sof1-like protein	1	9983
1106	(IPR001529) DNA-directed RNA polymerase, M/15kDa subunit	1	7134
1107	(IPR020070) Ribosomal protein L9, N-terminal	1	10901
1108	(IPR007472) N-end rule aminoacyl transferase, C-terminal	1	11245
1109	(IPR007320) Programmed cell death protein 2, C-terminal	1	10182
1110	(IPR033656) Histidyl-anticodon-binding	1	2519
1111	(IPR032790) Glycogen debranching enzyme, C-terminal	1	10211
1112	(IPR011679) Endoplasmic reticulum resident protein 29, C-terminal	1	9198
1113	(IPR035009) SR140, RNA recognition motif	1	10178
1114	(IPR035676) SH2 adaptor protein C, SH2 domain	1	8309
1115	(IPR007148) Small-subunit processome, Utp12	1	3005
1116	(IPR015914) Purple acid phosphatase, N-terminal	1	7534
1117	(IPR006909) Rad21/Rec8-like protein, C-terminal, eukaryotic	1	9515
1118	(IPR028091) FAM91, N-terminal domain	1	13302
1119	(IPR011422) BRCA1-associated 2	1	15175
1120	(IPR016090) Phospholipase A2 domain	1	10105
1121	(IPR019542) Enhancer of polycomb-like, N-terminal	1	8735
1122	(IPR009073) Co-chaperone HscB, C-terminal oligomerisation domain	1	10168
1123	(IPR014883) VRR-NUC domain	1	9530
1124	(IPR020476) NUDIX hydrolase	1	9748
1125	(IPR005121) Ferrodoxin-fold anticodon-binding domain	1	9328
1126	(IPR000409) BEACH domain	1	11163
1127	(IPR022159) Tuftelin interacting protein, N-terminal domain	1	12654
1128	(IPR005052) Legume-like lectin	1	8476
1129	(IPR004167) Peripheral subunit-binding domain	1	8487
1130	(IPR034653) SPF45, RNA recognition motif	1	10361
1131	(IPR041507) Peptidase C12, C-terminal domain	1	361
1132	(IPR018617) Ima1, N-terminal domain	1	14771
1133	(IPR001912) Ribosomal protein S4/S9, N-terminal	1	13258
1134	(IPR040450) TFIIF beta subunit, HTH domain	1	12031
1135	(IPR034330) Glutathione S-transferases, class Zeta , C-terminal	1	10895
1136	(IPR025607) Ribosomal protein L5 eukaryotic/L18 archaeal, C-terminal	1	10282
1137	(IPR039432) SRP9 domain	1	7478
1138	(IPR010655) Pre-mRNA cleavage complex subunit Clp1, C-terminal	1	10763
1139	(IPR018149) Lysyl-tRNA synthetase, class II, C-terminal	1	8864
1140	(IPR031161) Peptidase family M60 domain	1	10373
1141	(IPR022649) Proliferating cell nuclear antigen, PCNA, C-terminal	1	11066
1142	(IPR001158) DIX domain	1	18052
1143	(IPR041212) Vta1, C-terminal	1	8867
1144	(IPR020783) Ribosomal protein L11, C-terminal	1	3062
1145	(IPR008532) NFACT, RNA-binding domain	1	9944
1146	(IPR022056) CpG binding protein, C-terminal	1	12735
1147	(IPR021600) Transcription factor TFIIE alpha subunit, C-terminal	1	10360
1148	(IPR003186) Proteasome activator PA28, C-terminal domain	1	5696
1149	(IPR034751) Yippee domain	1	13810
1150	(IPR034746) POTRA domain	1	8450
1151	(IPR013883) Transcription factor Iwr1 domain	1	14513
1152	(IPR031790) Nitric oxide synthase-interacting protein, zinc-finger	1	13608
1153	(IPR005617) Groucho/TLE, N-terminal Q-rich domain	1	2227
1154	(IPR013548) Plexin, cytoplasmic RasGAP domain	1	6916
1155	(IPR004971) mRNA (guanine-N(7))-methyltransferase domain	1	9727
1156	(IPR009755) Regulator of MON1-CCZ1 complex, C-terminal	1	10235
1157	(IPR012309) DNA ligase, ATP-dependent, C-terminal	1	6456
1158	(IPR016072) SKP1 component, dimerisation	1	10563
1159	(IPR032319) Polyribonucleotide 5'-hydroxyl-kinase Clp1, P-loop domain	1	10763
1160	(IPR010750) SGF29 tudor-like domain	1	4391
1161	(IPR004457) Zinc finger, ZPR1-type	1	9840
1162	(IPR019495) Exosome complex component CSL4, C-terminal	1	5920
1163	(IPR040464) Inositol 1,3,4-trisphosphate 5/6-kinase, ATP-grasp domain	1	4562
1164	(IPR003130) Dynamin GTPase effector	1	9080
1165	(IPR003781) CoA-binding	1	9552
1166	(IPR006048) Alpha-amylase/branching enzyme, C-terminal all beta	1	2924
1167	(IPR025110) AMP-binding enzyme, C-terminal domain	1	8400
1168	(IPR022417) Porphobilinogen deaminase, N-terminal	1	13482
1169	(IPR014786) Anaphase-promoting complex subunit 2, C-terminal	1	8999
1170	(IPR002156) Ribonuclease H domain	1	11602
1171	(IPR002884) P domain	1	8337
1172	(IPR002931) Transglutaminase-like	1	10593
1173	(IPR007330) MIT	1	2100
1174	(IPR040909) E3 ubiquitin-protein ligase CHFR, cysteine rich domain with multizinc binding	1	5846
1175	(IPR033648) AAR2, C-terminal	1	5228
1176	(IPR018143) Folate receptor-like	1	10609
1177	(IPR019489) Clp ATPase, C-terminal	1	8840
1178	(IPR006158) Cobalamin (vitamin B12)-binding domain	1	4179
1179	(IPR041619) Nicotinate phosphoribosyltransferase C-terminal domain	1	11135
1180	(IPR008138) Saposin B type, region 2	1	8348
1181	(IPR034300) NADP transhydrogenase beta-like domain	1	8528
1182	(IPR015155) PLAA family ubiquitin binding domain	1	8463
1183	(IPR010918) PurM-like, C-terminal domain	1	9825
1184	(IPR035105) Deoxycytidylate deaminase domain	1	11926
1185	(IPR033871) Sm-like protein LSm5	1	16754
1186	(IPR012973) NOG, C-terminal	1	8277
1187	(IPR003169) GYF domain	1	15088
1188	(IPR001754) Orotidine 5'-phosphate decarboxylase domain	1	10382
1189	(IPR024790) Anaphase-promoting complex subunit 4 long domain	1	2579
1190	(IPR023362) PH-BEACH domain	1	17106
1191	(IPR019136) Transcription factor IIIC subunit 5, HTH domain	1	9186
1192	(IPR033720) Elongation factor Tu, domain 2	1	5232
1193	(IPR041265) Propionyl-coenzyme A carboxylase, BT domain	1	8210
1194	(IPR001093) IMP dehydrogenase/GMP reductase	1	4217
1195	(IPR004646) Fe-S hydro-lyase, tartrate dehydratase alpha-type, catalytic domain	1	4544
1196	(IPR013855) Cdc37, N-terminal domain	1	8365
1197	(IPR015143) L27-1	1	5322
1198	(IPR037851) ADAP, PH domain 2	1	8841
1199	(IPR031549) Abnormal spindle-like microcephaly-associated protein, ASH domain	1	10847
1200	(IPR041982) Ribosomal protein S4, KOW domain	1	326
1201	(IPR017981) GPCR, family 2-like	1	14140
1202	(IPR001060) FCH domain	1	13858
1203	(IPR013932) TATA-binding protein interacting (TIP20)	1	5392
1204	(IPR023573) Ribosomal protein 50S-L18Ae/60S-L20/60S-L18A	1	13186
1205	(IPR019575) NADH-ubiquinone oxidoreductase 51kDa subunit, iron-sulphur binding domain	1	45
1206	(IPR035371) Nrap protein, domain 6	1	11591
1207	(IPR012945) Tubulin binding cofactor C-like domain	1	14021
1208	(IPR013915) Pre-mRNA-splicing factor 19	1	16052
1209	(IPR019468) Adenylosuccinate lyase C-terminal	1	11635
1210	(IPR028098) Glycosyltransferase subfamily 4-like, N-terminal domain	1	4291
1211	(IPR021757) Ribosomal protein L46, N-terminal	1	14491
1212	(IPR014741) Adaptor protein Cbl, EF hand-like	1	16988
1213	(IPR002579) Peptide methionine sulphoxide reductase MrsB	1	4771
1214	(IPR032378) ZC3H15/TMA46 family, C-terminal	1	9924
1215	(IPR021786) Pre-mRNA splicing factor component Cdc5p/Cef1	1	8965
1216	(IPR040896) 26S proteasome regulatory subunit RPN5, C-terminal domain	1	8926
1217	(IPR006573) Neuralized homology repeat (NHR) domain	1	10061
1218	(IPR002818) DJ-1/PfpI	1	12126
1219	(IPR034101) Sm-like protein Lsm4	1	7230
1220	(IPR012492) Protein RED, C-terminal	1	8949
1221	(IPR034363) eIF3B, RNA recognition motif	1	14177
1222	(IPR032450) SMARCC, N-terminal	1	13204
1223	(IPR037871) Phafin, PH domain	1	6126
1224	(IPR000488) Death domain	1	2143
1225	(IPR011494) TUP1-like enhancer of split	1	12146
1226	(IPR024548) Copper type II ascorbate-dependent monooxygenase, C-terminal	1	586
1227	(IPR040745) Ankyrin, UPA domain	1	6841
1228	(IPR022628) S-adenosylmethionine synthetase, N-terminal	1	8533
1229	(IPR041698) Methyltransferase domain 25	1	12923
1230	(IPR002775) DNA/RNA-binding protein Alba-like	1	4012
1231	(IPR013822) Signal recognition particle SRP54, helical bundle	1	4164
1232	(IPR041616) Phenylalanyl tRNA synthetase beta chain, core domain	1	10874
1233	(IPR025223) S1-like RNA binding domain	1	8466
1234	(IPR013857) NADH:ubiquinone oxidoreductase intermediate-associated protein 30	1	13266
1235	(IPR012577) NIPSNAP	1	8976
1236	(IPR025192) Succinate dehydogenase/fumarate reductase N-terminal	1	10279
1237	(IPR001322) Lamin tail domain	1	8539
1238	(IPR033729) Serine-tRNA ligase catalytic core domain	1	10720
1239	(IPR032570) Splicing factor 1, helix-hairpin domain	1	11880
1240	(IPR019464) RNA polymerase II elongation factor ELL, N-terminal	1	8206
1241	(IPR041093) DIS3-like exonuclease 2, C-terminal	1	10212
1242	(IPR001895) Ras guanine-nucleotide exchange factors catalytic domain	1	6238
1243	(IPR011762) Acetyl-coenzyme A carboxyltransferase, N-terminal	1	13297
1244	(IPR013697) DNA polymerase epsilon, catalytic subunit A, C-terminal	1	15057
1245	(IPR016054) Ly-6 antigen/uPA receptor-like	1	18073
1246	(IPR027007) DHR-1 domain	1	17896
1247	(IPR032193) CCR4-NOT transcription complex subunit 1, TTP binding domain	1	9822
1248	(IPR013873) Cdc37, C-terminal	1	8365
1249	(IPR008333) Flavoprotein pyridine nucleotide cytochrome reductase-like, FAD-binding domain	1	9559
1250	(IPR035075) PRMT5 arginine-N-methyltransferase	1	15319
1251	(IPR019544) Tetratricopeptide, SHNi-TPR domain	1	10865
1252	(IPR005798) Cytochrome b/b6, C-terminal	1	652
1253	(IPR028159) RPA-interacting protein, C-terminal domain	1	9061
1254	(IPR004044) K Homology domain, type 2	1	11678
1255	(IPR006551) Polynucleotide 3'-phosphatase	1	806
1256	(IPR000219) Dbl homology (DH) domain	1	14696
1257	(IPR032456) CAAX prenyl protease 1, N-terminal	1	8801
1258	(IPR011685) LETM1-like	1	13103
1259	(IPR014012) Helicase/SANT-associated domain	1	11440
1260	(IPR041433) 26S proteasome non-ATPase regulatory subunit RPN1, C-terminal	1	9138
1261	(IPR005467) Histidine kinase domain	1	8861
1262	(IPR001962) Asparagine synthase	1	13262
1263	(IPR019832) Manganese/iron superoxide dismutase, C-terminal	1	11519
1264	(IPR020546) ATP synthase, F1 complex, delta/epsilon subunit, N-terminal	1	12382
1265	(IPR000184) Bacterial surface antigen (D15)	1	8450
1266	(IPR007180) Domain of unknown function DUF382	1	4474
1267	(IPR039431) Vta1/callose synthase, N-terminal	1	8867
1268	(IPR014031) Beta-ketoacyl synthase, C-terminal	1	11275
1269	(IPR025761) FFD box	1	9047
1270	(IPR032678) tRNA synthetases class I, catalytic domain	1	17184
1271	(IPR013599) TRAM1-like protein	1	8577
1272	(IPR031692) EH domain-containing protein, N-terminal	1	8284
1273	(IPR035482) Phosphoglucose isomerase, SIS domain 2	1	9899
1274	(IPR000793) ATP synthase, alpha subunit, C-terminal	1	8473
1275	(IPR022091) TATA element modulatory factor 1, TATA binding	1	11592
1276	(IPR001206) Diacylglycerol kinase, catalytic domain	1	7095
1277	(IPR000014) PAS domain	1	12492
1278	(IPR025834) Topoisomerase I C-terminal domain	1	1315
1279	(IPR034110) LSM domain containing 1	1	15888
1280	(IPR004443) YjeF N-terminal domain	1	1743
1281	(IPR014851) BCS1, N-terminal	1	5670
1282	(IPR003100) PAZ domain	1	10408
1283	(IPR019160) Exocyst complex component Sec3, C-terminal	1	12085
1284	(IPR001466) Beta-lactamase-related	1	9171
1285	(IPR003123) VPS9 domain	1	10801
1286	(IPR028275) Clustered mitochondria protein, N-terminal	1	14572
1287	(IPR010598) D-glucuronyl C5-epimerase, C-terminal	1	14778
1288	(IPR013040) Coatomer, gamma subunit, appendage, Ig-like subdomain	1	8755
1289	(IPR018027) Asn/Gln amidotransferase	1	10161
1290	(IPR021661) TRF2-interacting telomeric protein/Rap1, C-terminal	1	14539
1291	(IPR015163) Cdc6, C-terminal	1	9946
1292	(IPR035425) CENP-T/Histone H4, histone fold	1	24
1293	(IPR023616) Cytochrome c oxidase-like, subunit I domain	1	186
1294	(IPR041692) HHH domain 9	1	13076
1295	(IPR029446) Coatomer beta subunit, appendage platform domain	1	8575
1296	(IPR035585) Serine/arginine-rich splicing factor SRSF4-like, RNA recognition motif 1	1	9680
1297	(IPR039187) Strawberry notch, AAA domain	1	14372
1298	(IPR023340) UMA domain	1	4988
1299	(IPR006555) ATP-dependent helicase, C-terminal	1	986
1300	(IPR021859) XRN2-binding (XTBD) domain	1	16678
1301	(IPR040459) MJ1316 RNA cyclic group end recognition domain	1	4077
1302	(IPR033121) Peptidase family A1 domain	1	8831
1303	(IPR022666) Ribosomal Proteins L2, RNA binding domain	1	11027
1304	(IPR034907) Nucleoside diphosphate kinase-like domain	1	13073
1305	(IPR000868) Isochorismatase-like	1	11633
1306	(IPR032270) AMPK, C-terminal adenylate sensor domain	1	740
1307	(IPR007701) Interferon-related developmental regulator, N-terminal	1	37
1308	(IPR035018) Spt6, SH2 domain, C terminus	1	10236
1309	(IPR041985) Ribosomal protein L14, KOW motif	1	6638
1310	(IPR015348) Clathrin, heavy chain, linker, core motif	1	13621
1311	(IPR005148) Arginyl tRNA synthetase N-terminal domain	1	12343
1312	(IPR034333) Glutathione S-transferases, class Zeta , N-terminal	1	10895
1313	(IPR004147) UbiB domain	1	13093
1314	(IPR022630) S-adenosylmethionine synthetase, C-terminal	1	8533
1315	(IPR002429) Cytochrome c oxidase subunit II-like C-terminal	1	553
1316	(IPR037291) Domain of unknown function DUF4139	1	12476
1317	(IPR004953) EB1, C-terminal	1	5089
1318	(IPR000738) WHEP-TRS domain	1	5316
1319	(IPR019610) Iron sulphur domain-containing, mitoNEET, N-terminal	1	14857
1320	(IPR028077) Ubiquitin/SUMO-activating enzyme ubiquitin-like domain	1	12848
1321	(IPR030397) SEPARIN core domain	1	11249
1322	(IPR020602) GTP cyclohydrolase I domain	1	13447
1323	(IPR035587) DUS-like, FMN-binding domain	1	9912
1324	(IPR003156) DHHA1 domain	1	9465
1325	(IPR002730) Ribonuclease P/MRP, subunit p29	1	12007
1326	(IPR019471) Interferon regulatory factor-3	1	9110
1327	(IPR013238) RNA polymerase III, subunit Rpc25	1	10629
1328	(IPR003173) Transcriptional coactivator p15 (PC4)	1	17221
1329	(IPR018392) LysM domain	1	4295
1330	(IPR015649) Schwannomin interacting protein 1, C-terminal	1	3987
1331	(IPR005645) Serine hydrolase FSH	1	11290
1332	(IPR012952) BING4, C-terminal domain	1	14528
1333	(IPR024602) Conserved oligomeric Golgi complex, subunit 2, N-terminal	1	18285
1334	(IPR010441) CH-like domain in sperm protein	1	12202
1335	(IPR011320) Ribonuclease H1, N-terminal	1	11602
1336	(IPR000783) RNA polymerase, subunit H/Rpb5 C-terminal	1	12072
1337	(IPR007758) Nucleoporin, NSP1-like, C-terminal	1	4394
1338	(IPR013729) Multiprotein bridging factor 1, N-terminal	1	4100
1339	(IPR004098) Prp18	1	8969
1340	(IPR006674) HD domain	1	7046
1341	(IPR004837) Sodium/calcium exchanger membrane region	1	12351
1342	(IPR041709) Elongation factor Tu (EF-Tu), GTP-binding domain	1	5232
1343	(IPR003864) Calcium-dependent channel, 7TM region, putative phosphate	1	11031
1344	(IPR013725) DNA replication factor RFC1, C-terminal	1	12036
1345	(IPR007209) RNase L inhibitor RLI, possible metal-binding domain	1	13468
1346	(IPR041991) Eukaryotic Ribosomal Protein L27, KOW domain	1	18230
1347	(IPR000857) MyTH4 domain	1	4861
1348	(IPR017927) FAD-binding domain, ferredoxin reductase-type	1	9559
1349	(IPR001628) Zinc finger, nuclear hormone receptor-type	1	10423
1350	(IPR031656) Alpha-glycerophosphate oxidase, C-terminal	1	8468
1351	(IPR013923) Autophagy-related protein 16	1	16512
1352	(IPR001304) C-type lectin-like	1	13301
1353	(IPR015260) Syntaxin 6, N-terminal	1	14351
1354	(IPR004939) APC10/DOC domain	1	14767
1355	(IPR004125) Signal recognition particle, SRP54 subunit, M-domain	1	4164
1356	(IPR000582) Acyl-CoA-binding protein, ACBP	1	3924
1357	(IPR033979) MINDY deubiquitinase domain	1	10472
1358	(IPR034130) RNA-binding protein Musashi homologue, RNA recognition motif 1	1	5802
1359	(IPR011710) Coatomer beta subunit, C-terminal	1	8575
1360	(IPR004152) GAT domain	1	11171
1361	(IPR007853) Zinc finger, DNL-type	1	4976
1362	(IPR025609) Lsm14-like, N-terminal	1	14047
1363	(IPR031953) mRNA-decapping enzyme, C-terminal	1	8498
1364	(IPR007872) DPH-type metal-binding domain	1	13115
1365	(IPR010468) Hormone-sensitive lipase, N-terminal	1	15055
1366	(IPR024160) Bin3-type S-adenosyl-L-methionine binding domain	1	9828
1367	(IPR035019) Spt6, SH2 domain, N terminus	1	10236
1368	(IPR041789) ERM family, FERM domain C-lobe	1	8226
1369	(IPR034201) RNPS1, RNA recognition motif	1	13252
1370	(IPR013717) PIG-P	1	11447
1371	(IPR002784) Ribosomal protein L14e domain	1	6638
1372	(IPR015360) XPC-binding domain	1	8494
1373	(IPR002044) Carbohydrate binding module family 20	1	11472
1374	(IPR039496) CCDC92/74, coiled-coil domain	1	7288
1375	(IPR013010) Zinc finger, SIAH-type	1	4406
1376	(IPR010675) RNA methyltransferase bin3, C-terminal	1	9828
1377	(IPR040961) Cop9 signalosome subunit 5 C-terminal domain	1	10478
1378	(IPR015898) G-protein gamma-like domain	1	12345
1379	(IPR005844) Alpha-D-phosphohexomutase, alpha/beta/alpha domain I	1	8467
1380	(IPR013029) YchF, C-terminal domain	1	9364
1381	(IPR010541) Domain of unknown function DUF1115	1	5262
1382	(IPR006083) Phosphoribulokinase/uridine kinase	1	3208
1383	(IPR041808) CUE domain-containing protein 3, CUE domain	1	10554
1384	(IPR013934) Small-subunit processome, Utp13	1	10111
1385	(IPR007207) CCR4-Not complex component, Not N-terminal domain	1	17327
1386	(IPR019194) Transcription elognation factor Eaf, N-terminal	1	8802
1387	(IPR021148) Polysaccharide biosynthesis domain	1	12578
1388	(IPR010844) Occludin homology domain	1	8206
1389	(IPR009462) Domain of unknown function DUF1086	1	8695
1390	(IPR005097) Saccharopine dehydrogenase, NADP binding domain	1	15193
1391	(IPR019774) Aromatic amino acid hydroxylase, C-terminal	1	8672
1392	(IPR019380) Casein kinase substrate, phosphoprotein PP28	1	9178
1393	(IPR005176) Potentiating neddylation domain	1	9235
1394	(IPR003124) WH2 domain	1	14858
1395	(IPR019601) Oxoglutarate/iron-dependent oxygenase, C-terminal degradation domain	1	11460
1396	(IPR005720) Dihydroorotate dehydrogenase domain	1	9922
1397	(IPR024974) Sde2, N-terminal ubiquitin domain	1	195
1398	(IPR024654) Calcineurin-like phosphoesterase domain, lpxH-type	1	298
1399	(IPR034143) snRNP70, RNA recognition motif	1	5518
1400	(IPR001915) Peptidase M48	1	8801
1401	(IPR037768) Copine, C2B domain	1	13528
1402	(IPR013024) Gamma-glutamyl cyclotransferase-like	1	11626
1403	(IPR011760) Pseudouridine synthase, TruD, insertion domain	1	13558
1404	(IPR001387) Cro/C1-type helix-turn-helix domain	1	4100
1405	(IPR034102) Small nuclear ribonucleoprotein D1	1	13496
1406	(IPR034105) Sm-like protein Lsm3	1	14549
1407	(IPR027911) Domain of unknown function DUF4604	1	12434
1408	(IPR008847) Suppressor of forked	1	5512
1409	(IPR000494) Receptor L-domain	1	10565
1410	(IPR019561) Translocon Sec61/SecY, plug domain	1	8438
1411	(IPR007717) Nuclear pore localisation protein NPL4, C-terminal	1	5066
1412	(IPR014898) Zinc finger, C2H2, LYAR-type	1	9627
1413	(IPR011576) Pyridoxamine 5'-phosphate oxidase, putative	1	11850
1414	(IPR035490) GlmS/FrlB, SIS domain 2	1	9855
1415	(IPR041667) Cupin-like domain 8	1	7064
1416	(IPR029257) Rab3GAP regulatory subunit, C-terminal	1	5784
1417	(IPR012984) PROCT domain	1	8568
1418	(IPR019180) Oxidoreductase-like, N-terminal	1	15690
1419	(IPR021643) Mediator complex, subunit Med13, N-terminal, metazoa/fungi	1	16442
1420	(IPR032631) P-type ATPase, N-terminal	1	13769
1421	(IPR019339) CBF1-interacting co-repressor CIR, N-terminal domain	1	9274
1422	(IPR032451) SMARCC, C-terminal	1	9043
1423	(IPR001839) Transforming growth factor-beta, C-terminal	1	10572
1424	(IPR013234) PIGA, GPI anchor biosynthesis	1	4290
1425	(IPR019539) Galactokinase galactose-binding domain	1	8500
1426	(IPR006085) XPG N-terminal	1	6965
1427	(IPR019580) Pre-mRNA-processing-splicing factor 8, U6-snRNA-binding	1	15092
1428	(IPR013099) Potassium channel domain	1	10653
1429	(IPR015285) RIO2 kinase winged helix domain, N-terminal	1	991
1430	(IPR040793) CDH1/2, SANT-Helical linker 1	1	8290
1431	(IPR011538) NADH-ubiquinone oxidoreductase 51kDa subunit, FMN-binding domain	1	45
1432	(IPR013650) ATP-grasp fold, succinyl-CoA synthetase-type	1	8558
1433	(IPR001498) Impact, N-terminal	1	171
1434	(IPR032377) STAR protein, homodimerisation region	1	16745
1435	(IPR001662) Elongation factor 1B gamma, C-terminal	1	8651
1436	(IPR017930) Myb domain	1	13160
1437	(IPR028097) FAM91, C-terminal domain	1	9059
1438	(IPR028124) Small acidic protein-like domain	1	9173
1439	(IPR022412) Quinolinate phosphoribosyl transferase, N-terminal	1	14923
1440	(IPR035680) Hydroxyacylglutathione hydrolase, MBL domain	1	10141
1441	(IPR011262) DNA-directed RNA polymerase, insert domain	1	11017
1442	(IPR007080) RNA polymerase Rpb1, domain 1	1	13071
1443	(IPR006884) Fzo/mitofusin HR2 domain	1	8563
1444	(IPR002791) Domain of unknown function DUF89	1	13060
1445	(IPR002035) von Willebrand factor, type A	1	6384
1446	(IPR032792) Glycogen debranching enzyme, glucanotransferase domain	1	14927
1447	(IPR032277) 40S ribosomal protein S4, C-terminal domain	1	326
1448	(IPR021977) D domain of beta-TrCP	1	6046
1449	(IPR007865) Aminopeptidase P, N-terminal	1	4564
1450	(IPR041442) PIH1D1/2/3, CS-like domain	1	12665
1451	(IPR012419) Cas1p 10 TM acyl transferase domain	1	11217
1452	(IPR019008) Domain of unknown function DUF2012	1	9180
1453	(IPR016073) SKP1 component, POZ domain	1	10563
1454	(IPR005850) Galactose-1-phosphate uridyl transferase, C-terminal	1	10308
1455	(IPR041562) MCM, AAA-lid domain	1	11048
1456	(IPR006569) CID domain	1	8928
1457	(IPR005633) Ribosomal protein L23/L25, N-terminal	1	1349
1458	(IPR013876) TFIIH p62 subunit, N-terminal	1	13107
1459	(IPR031964) Caspase recruitment domain	1	13963
1460	(IPR020616) Thiolase, N-terminal	1	9577
1461	(IPR005612) CCAAT-binding factor	1	13272
1462	(IPR004887) Glutathione synthase, substrate-binding domain	1	9521
1463	(IPR000572) Oxidoreductase, molybdopterin-binding domain	1	17977
1464	(IPR006786) Pinin/SDK/MemA protein	1	8542
1465	(IPR000534) Semialdehyde dehydrogenase, NAD-binding	1	10463
1466	(IPR010432) RDD	1	9137
1467	(IPR003953) FAD-dependent oxidoreductase 2, FAD binding domain	1	4612
1468	(IPR008278) 4'-phosphopantetheinyl transferase domain	1	13780
1469	(IPR041306) NSD, Cys-His rich domain	1	11730
1470	(IPR022629) S-adenosylmethionine synthetase, central domain	1	8533
1471	(IPR019831) Manganese/iron superoxide dismutase, N-terminal	1	11519
1472	(IPR040463) BAP29/BAP31, transmembrane domain	1	10051
1473	(IPR013162) CD80-like, immunoglobulin C2-set	1	5825
1474	(IPR014782) Peptidase M1, membrane alanine aminopeptidase	1	8737
1475	(IPR025260) Domain of unknown function DUF4208	1	8290
1476	(IPR037683) Rmd5, degenerated RING (dRING) finger	1	4252
1477	(IPR033948) Electron transfer flavoprotein, beta subunit, N-terminal	1	9879
1478	(IPR013500) DNA topoisomerase I, catalytic core, eukaryotic-type	1	1315
1479	(IPR007846) RNA-recognition motif (RRM) Nup35-type domain	1	8916
1480	(IPR013535) PUL domain	1	8463
1481	(IPR013846) mRNA capping enzyme, C-terminal	1	13307
1482	(IPR024678) Serine/threonine-protein kinase OSR1/WNK, CCT domain	1	3654
1483	(IPR003097) Sulfite reductase [NADPH] flavoprotein alpha-component-like, FAD-binding	1	16237
1484	(IPR034182) Kexin/furin catalytic domain	1	8337
1485	(IPR025969) Abscisic acid G-protein coupled receptor-like domain	1	12708
1486	(IPR001347) Sugar isomerase (SIS)	1	9855
1487	(IPR006692) Coatomer, WD associated region	1	8327
1488	(IPR031309) Ribosomal protein L5, C-terminal	1	12822
1489	(IPR002500) Phosphoadenosine phosphosulphate reductase	1	13058
1490	(IPR015353) Rubisco LSMT, substrate-binding domain	1	10172
1491	(IPR027012) Enkurin domain	1	10569
1492	(IPR006911) Armadillo repeat-containing domain	1	9408
1493	(IPR019564) Mitochondrial outer membrane transport complex Sam37/metaxin, N-terminal domain	1	12498
1494	(IPR034784) PDIP3, RNA recognition motif	1	4310
1495	(IPR041228) Dynein heavy chain, C-terminal domain	1	8506
1496	(IPR031657) Replication protein A, OB domain	1	9204
1497	(IPR041706) YchF, N-terminal	1	9364
1498	(IPR024975) Domain of unknown function DUF3883	1	10986
1499	(IPR041705) VapC-like Sll0205 protein, PIN domain	1	16804
1500	(IPR004367) Cyclin, C-terminal domain	1	2352
1501	(IPR025768) TFG box	1	9047
1502	(IPR006207) Cystine knot, C-terminal	1	14088
1503	(IPR027350) Glycosyltransferase family 23 (GT23) domain	1	14793
1504	(IPR006204) GHMP kinase N-terminal domain	1	8500
1505	(IPR009730) Micro-fibrillar-associated protein 1, C-terminal	1	8810
1506	(IPR019783) Ribosome maturation protein SBDS, N-terminal	1	5090
1507	(IPR019535) Little elongation complex subunit 2 , C-terminal	1	9779
1508	(IPR036607) Glucosidase 2 subunit beta-like	1	8757
1509	(IPR022581) Spt5 transcription elongation factor, N-terminal	1	7052
1510	(IPR011084) DNA repair metallo-beta-lactamase	1	5620
1511	(IPR012916) RED-like, N-terminal	1	8949
1512	(IPR013955) Replication factor A, C-terminal	1	9204
1513	(IPR019574) NADH:ubiquinone oxidoreductase, subunit G, iron-sulphur binding	1	17804
1514	(IPR004170) WWE domain	1	3037
1515	(IPR002715) Nascent polypeptide-associated complex NAC domain	1	11509
1516	(IPR001792) Acylphosphatase-like domain	1	6421
1517	(IPR019481) Transcription factor TFIIIC, triple barrel domain	1	9672
1518	(IPR034733) Acetyl-CoA carboxylase	1	13297
1519	(IPR042128) NuoE domain	1	6198
1520	(IPR013845) Ribosomal protein S4e, central region	1	326
1521	(IPR021841) Vacuolar protein 14 C-terminal Fig4-binding domain	1	2299
1522	(IPR001303) Class II aldolase/adducin N-terminal	1	7409
1523	(IPR035825) Alpha Spectrin, SH3 domain	1	3496
1524	(IPR018961) DnaJ homologue, subfamily C, member 28, conserved domain	1	8428
1525	(IPR013525) ABC-2 type transporter	1	15813
1526	(IPR018996) Man1/Src1, C-terminal	1	8221
1527	(IPR032706) Transcription elongation factor Spt6, helix-hairpin-helix motif	1	16395
1528	(IPR005788) Disulphide isomerase	1	8471
1529	(IPR002539) MaoC-like dehydratase domain	1	12465
1530	(IPR034240) eIF3G, RNA recognition motif	1	127
1531	(IPR040986) Sulfhydryl oxidase, flavin adenine dinucleotide (FAD) binding domain	1	4728
1532	(IPR015022) Microtubule-associated serine/threonine-protein kinase, domain	1	5716
1533	(IPR041477) Domain of unknown function DUF5577	1	13451
1534	(IPR034004) Pol I subunit A12, C-terminal zinc ribbon	1	13362
1535	(IPR031330) Glycoside hydrolase 35, catalytic domain	1	8274
1536	(IPR001296) Glycosyl transferase, family 1	1	10592
1537	(IPR032003) Ribosome-associated complex head domain	1	8674
1538	(IPR018484) Carbohydrate kinase, FGGY, N-terminal	1	14209
1539	(IPR009851) Modifier of rudimentary, Modr	1	9435
1540	(IPR019572) Ubiquitin-activating enzyme, catalytic cysteine domain	1	8621
1541	(IPR001351) Ribosomal protein S3, C-terminal	1	11678
1542	(IPR025884) Methyl-CpG binding protein 2/3, C-terminal domain	1	2536
1543	(IPR030394) HflX-type guanine nucleotide-binding (G) domain	1	9941
1544	(IPR017852) GPI ethanolamine phosphate transferase 1, C-terminal	1	291
1545	(IPR018307) AVL9/DENND6 domain	1	11279
1546	(IPR024598) Domain of unknown function DUF3449	1	8820
1547	(IPR019576) Pyridoxine 5'-phosphate oxidase, dimerisation, C-terminal	1	11850
1548	(IPR041540) Vms1-associating treble clef domain	1	17006
1549	(IPR001098) DNA-directed DNA polymerase, family A, palm domain	1	11347
1550	(IPR035240) SprT-like, zinc ribbon domain	1	11151
1551	(IPR005189) Focal adhesion kinase, targeting (FAT) domain	1	9385
1552	(IPR001674) GMP synthase, C-terminal	1	2190
1553	(IPR007319) Small-subunit processome, Utp21	1	10751
1554	(IPR010303) CREB-binding protein/p300, atypical RING domain	1	10610
1555	(IPR020850) GTPase effector domain	1	9080
1556	(IPR003889) FY-rich, C-terminal	1	14975
1557	(IPR001796) Dihydrofolate reductase domain	1	11802
1558	(IPR034857) TFG, PB1 domain	1	14006
1559	(IPR015795) Pyruvate kinase, C-terminal	1	8918
1560	(IPR039517) C6orf106, UBA-like domain	1	13501
1561	(IPR026854) Vacuolar protein sorting-associated protein 13, N-terminal domain	1	15226
1562	(IPR018940) Elongation factor 1 beta central acidic region, eukaryote	1	10410
1563	(IPR032803) PLD-like domain	1	11446
